# Supplementary material for: Dysregulated immunity in PID patients with low GARP expression on Tregs due to mutations in LRRC32
Source: PubMed Central journal article supplement (PMC8245512; doi:10.1038/s41423-021-00701-z), 2021-05-31
Supplement: 41423_2021_701_MOESM4_ESM.pdf [file 41423_2021_701_MOESM4_ESM.pdf]

| SeqID   | ProbeID        | GeneName       | Description                                     |
|---------|----------------|----------------|-------------------------------------------------|
| 2271329 | A_55_P2031466  | Lrrc32         | Mus musculus leucine rich repeat containing 32  |
| 2271288 | A_55_P1985422  | LOC100044227   | Q811B0_MOUSE (Q811B0) Erythroid different       |
| 2292890 | A_55_P2034481  | Erdr1          | Mus musculus erythroid differentiation regulat  |
| 2290610 | A_51_P349213   | Fcrl1          | Mus musculus Fc receptor-like 1 (Fcrl1), transc |
| 2298425 | A_51_P501844   | Cyp26b1        | Mus musculus cytochrome P450, family 26, su     |
| 2264815 | A_55_P2062133  | Etv3           | Mus musculus ets variant gene 3 (Etv3), trans   |
| 2295558 | A_30_P01027087 | A_30_P01027087 | lincRNA:chr3:79069438-79073704 reverse st       |
| 2285809 | A_55_P2016166  | Wfdc2          | Mus musculus WAP four-disulfide core domain     |
| 2306135 | A_30_P01021230 | A_30_P01021230 | lincRNA:chr3:37659958-37665945 forward st       |
| 2264323 | A_52_P512427   | 2510049J12Rik  | Mus musculus RIKEN cDNA 2510049J12 gen          |
| 2310774 | A_55_P2107775  | Apol9a         | Mus musculus apolipoprotein L 9a (Apol9a), t    |
| 2286413 | A_66_P128761   | E430029J22Rik  | Mus musculus pyrin domain containing 3 (Pyr     |
| 2276525 | A_55_P1953341  | Wfdc2          | Mus musculus WAP four-disulfide core domain     |
| 2261113 | A_55_P1967286  | Gm1409         | immunoglobulin kappa variable 5-39 [Source:     |
| 2286414 | A_30_P01025525 | A_30_P01025525 | lincRNA:chr3:37659958-37665945 forward st       |
| 2275136 | A_55_P2144686  | Dmbt1          | Mus musculus deleted in malignant brain tumo    |
| 2259608 | A_55_P2023637  | Prg4           | Mus musculus proteoglycan 4 (megakaryocyte      |
| 2282501 | A_55_P2110136  | Arhgap29       | Mus musculus Rho GTPase activating protein      |
| 2263575 | A_55_P2043367  | Apol9a         | Mus musculus apolipoprotein L 9a (Apol9a), t    |
| 2306577 | A_66_P110633   | Apol9b         | Mus musculus apolipoprotein L 9b (Apol9b), t    |
| 2304380 | A_30_P01024788 | A_30_P01024788 | lincRNA:chr3:79069438-79073704 reverse st       |
| 2307570 | A_55_P2181222  | E430029J22Rik  | Mus musculus pyrin domain containing 3 (Pyr     |
| 2283521 | A_52_P481279   | Gm1060         | Mus musculus coiled-coil domain containing 1    |
| 2300377 | A_55_P1958018  | LOC100047337   | Q6EE68_PRODO (Q6EE68) Ribosomal prote           |
| 2292666 | A_55_P1960894  | Cabp1          | Mus musculus calcium binding protein 1 (Cabp    |
| 2286467 | A_55_P2056192  | NAP111293-1    | Unknown                                         |
| 2296377 | A_55_P2137828  | Gprc5b         | Mus musculus G protein-coupled receptor, far    |
| 2295324 | A_55_P2163098  | Akr1c18        | Mus musculus aldo-keto reductase family 1, m    |
| 2273936 | A_55_P2022971  | Tspan9         | Mus musculus tetraspanin 9 (Tspan9), mRNA       |
| 2273566 | A_30_P01025989 | A_30_P01025989 | lincRNA:chr3:84609788-84618062 reverse st       |
| 2310092 | A_52_P880457   | Ampd1          | Mus musculus adenosine monophosphate de         |
| 2293698 | A_55_P1973451  | Stra6          | Mus musculus stimulated by retinoic acid gene   |
| 2304572 | A_30_P01030239 | A_30_P01030239 | lincRNA:chr13:28506971-28511732 reverse s       |
| 2264160 | A_51_P466685   | Fbxl22         | Mus musculus F-box and leucine-rich repeat p    |
| 2289880 | A_30_P01028589 | A_30_P01028589 | lincRNA:chr7:134835448-134842613 forward        |
| 2288947 | A_55_P2050426  | Ankrd50        | Mus musculus ankyrin repeat domain 50 (Ank      |
| 2294793 | A_55_P1962603  | Cplx2          | Mus musculus complexin 2 (Cplx2), mRNA [NM      |
| 2259768 | A_55_P2024634  | Gm13546        | predicted gene 13546 [Source:MGI Symbol;A       |
| 2286112 | A_52_P588483   | Fbln1          | Mus musculus fibulin 1 (Fbln1), mRNA [NM_01     |
| 2295753 | A_66_P105075   | Mmp11          | Mus musculus matrix metalloproteinase 11 (Mn    |
| 2259463 | A_51_P268069   | Six1           | Mus musculus sine oculis-related homeobox 1     |
| 2287192 | A_52_P382802   | 1700102P08Rik  | Mus musculus RIKEN cDNA 1700102P08 gen          |
| 2267405 | A_52_P257502   | Igfbp4         | Mus musculus insulin-like growth factor bindin  |
| 2285998 | A_55_P2148400  | Gm2264         | Unknown                                         |
| 2296525 | A_30_P01022835 | A_30_P01022835 | lincRNA:chr3:106858397-106896812 reverse        |
| 2290988 | A_55_P2058297  | Sgip1          | Mus musculus SH3-domain GRB2-like (endop        |

|         |                |                |                                                                    |
|---------|----------------|----------------|--------------------------------------------------------------------|
| 2263864 | A_52_P646783   | Fbxl22         | Mus musculus F-box and leucine-rich repeat p                       |
| 2286408 | A_30_P01024831 | A_30_P01024831 | lincRNA:chr8:19678750-20038750 forward st                          |
| 2284827 | A_51_P218682   | 4930588N13Rik  | Mus musculus RIKEN cDNA 4930588N13 ger                             |
| 2309983 | A_55_P2183914  | Gm7120         | Mus musculus predicted gene 7120 (Gm7120                           |
| 2276254 | A_51_P114826   | Cdh13          | Mus musculus cadherin 13 (Cdh13), mRNA [N                          |
| 2297654 | A_55_P1962602  | Gm2690         | Mus musculus 2 days neonate sympathetic ga                         |
| 2266301 | A_55_P1989185  | ENSMUST0000010 | PREDICTED: Mus musculus predicted gene 6                           |
| 2295189 | A_52_P227267   | Atp1a2         | Mus musculus ATPase, Na <sup>+</sup> /K <sup>+</sup> transporting, |
| 2287554 | A_51_P398766   | Gbp1           | Mus musculus guanylate binding protein 1 (G                        |
| 2289922 | A_55_P2070441  | Sp6            | Mus musculus trans-acting transcription factor                     |
| 2264259 | A_55_P2001233  | E430029J22Rik  | Mus musculus pyrin domain containing 3 (Pyr                        |
| 2272018 | A_55_P1966383  | Gm2936         | Unknown                                                            |
| 2292116 | A_55_P1964433  | Zmynd12        | Mus musculus zinc finger, MYND domain cont                         |
| 2297550 | A_55_P2044582  | Igln5          | Mus musculus IgLON family member 5 (Igln5                          |
| 2292336 | A_55_P2072995  | ENSMUST0000010 | immunoglobulin kappa variable 11-125 [Sourc                        |
| 2268697 | A_66_P121480   | Sardh          | Mus musculus sarcosine dehydrogenase (Sar                          |
| 2290219 | A_55_P2024669  | Myo6           | Mus musculus myosin VI (Myo6), mRNA [NM_                           |
| 2283443 | A_51_P290576   | Plk2           | Mus musculus polo-like kinase 2 (Drosophila)                       |
| 2261730 | A_55_P2176280  | Prkar1b        | Mus musculus protein kinase, cAMP depende                          |
| 2267880 | A_55_P2040775  | Gm6837         | Mus musculus 921-L mRNA for presynaptic pr                         |
| 2298126 | A_55_P2074736  | Prkar1b        | Mus musculus protein kinase, cAMP depende                          |
| 2301495 | A_52_P52946    | 4922501L14Rik  | Mus musculus RIKEN cDNA 4922501L14 ger                             |
| 2311237 | A_51_P211854   | Selp           | Mus musculus selectin, platelet (Selp), mRNA                       |
| 2289499 | A_51_P258848   | 4933427G17Rik  | Mus musculus RIKEN cDNA 4933427G17 ger                             |
| 2303022 | A_30_P01020912 | A_30_P01020912 | lincRNA:chr10:3231337-3231802 forward stra                         |
| 2297898 | A_52_P344152   | Pik3ip1        | phosphoinositide-3-kinase interacting protein                      |
| 2312005 | A_55_P1991770  | Pdlim4         | Mus musculus PDZ and LIM domain 4 (Pdlim4                          |
| 2257498 | A_51_P131408   | Tnfrsf12a      | Mus musculus tumor necrosis factor receptor s                      |
| 2260729 | A_55_P2148402  | Cplx2          | Mus musculus complexin 2 (Cplx2), mRNA [NM                         |
| 2302158 | A_66_P121965   | 1110032F04Rik  | Mus musculus RIKEN cDNA 1110032F04 ger                             |
| 2263644 | A_52_P325443   | Arhgap29       | Mus musculus Rho GTPase activating protein                         |
| 2278358 | A_51_P214470   | 2610019F03Rik  | Mus musculus RIKEN cDNA 2610019F03 ger                             |
| 2281640 | A_30_P01020388 | A_30_P01020388 | lincRNA:chrX:47890565-47915775 forward st                          |
| 2303536 | A_55_P2028576  | Gm7057         | Unknown                                                            |
| 2303879 | A_55_P1989698  | Mmp11          | Mus musculus matrix metalloproteinase 11 (Mn                       |
| 2281996 | A_55_P2026982  | 2610019F03Rik  | Mus musculus RIKEN cDNA 2610019F03 ger                             |
| 2265778 | A_51_P258409   | Hey1           | Mus musculus hairy/enhancer-of-split related v                     |
| 2270098 | A_55_P2064351  | Vipr1          | Mus musculus vasoactive intestinal peptide re                      |
| 2310090 | A_52_P900300   | Gm6213         | Mus musculus predicted gene 6213 (Gm6213                           |
| 2272724 | A_51_P293938   | Rasl11b        | Mus musculus RAS-like, family 11, member B                         |
| 2289457 | A_55_P2180445  | Gm2742         | Unknown                                                            |
| 2298235 | A_55_P2056533  | Ntrk3          | Mus musculus neurotrophic tyrosine kinase, re                      |
| 2270946 | A_66_P122621   | ENSMUST0000006 | Mus musculus 16 days neonate thymus cDNA                           |
| 2303029 | A_55_P2120866  | LOC100044171   | PREDICTED: Mus musculus hypothetical LOC                           |
| 2300864 | A_30_P01018048 | A_30_P01018048 | lincRNA:chr3:37659958-37665945 forward st                          |
| 2302642 | A_52_P202142   | Sv2a           | Mus musculus synaptic vesicle glycoprotein 2                       |
| 2300019 | A_52_P316933   | Sh3bgrl2       | Mus musculus SH3 domain binding glutamic a                         |
| 2271862 | A_55_P1968085  | A_55_P1968085  | Unknown                                                            |
| 2257317 | A_51_P391955   | Dapl1          | Mus musculus death associated protein-like 1                       |
| 2271589 | A_51_P349413   | ENSMUST0000010 | ADP-ribosylation factor-like 5C [Source:MGI S                      |
| 2285704 | A_55_P1997651  | Espn           | Mus musculus espin (Espn), transcript variant                      |
| 2282251 | A_55_P2384671  | AK033123       | predicted gene, 17641 [Source:MGI Symbol;A                         |
| 2300919 | A_55_P1960043  | Sec31b         | Mus musculus Sec31 homolog B (S. cerevisia                         |
| 2299369 | A_55_P1992571  | Gm2952         | predicted gene, 17684 [Source:MGI Symbol;A                         |
| 2296596 | A_55_P2103249  | Cxcr1          | Mus musculus chemokine (C-X-C motif) recept                        |
| 2300416 | A_55_P2391881  | Gm12108        | predicted gene 12108 [Source:MGI Symbol;A                          |

|         |                |                |                                                  |
|---------|----------------|----------------|--------------------------------------------------|
| 2259114 | A_55_P2172086  | Gm10640        | Mus musculus adult male testis cDNA, RIKEN       |
| 2280536 | A_55_P2115044  | LOC100047266   | BY110436 RIKEN full-length enriched, 15 day      |
| 2269038 | A_55_P2416464  | 4921511117Rik  | Mus musculus adult male testis cDNA, RIKEN       |
| 2295625 | A_30_P01030370 | A_30_P01030370 | lincRNA:chr18:35967988-35968812 forward s        |
| 2295422 | A_55_P2043627  | Fam89a         | Mus musculus family with sequence similarity 8   |
| 2304442 | A_66_P138298   | Gm4371         | Mus musculus predicted gene 4371 (Gm4371)        |
| 2275740 | A_51_P104418   | Dusp10         | Mus musculus dual specificity phosphatase 10     |
| 2256887 | A_30_P01027107 | A_30_P01027107 | lincRNA:chr11:99048975-99062425 reverse s        |
| 2297016 | A_30_P01020593 | A_30_P01020593 | lincRNA:chr12:81217572-81233910 forward s        |
| 2296384 | A_55_P1979003  | LOC100044493   | Unknown                                          |
| 2272958 | A_55_P2041728  | Gm590          | Mus musculus predicted gene 590 (Gm590), m       |
| 2291699 | A_30_P01017850 | A_30_P01017850 | lincRNA:chr5:54053328-54053870 forward st        |
| 2270383 | A_52_P173442   | Wscd2          | Mus musculus WSC domain containing 2 (Wsc        |
| 2266643 | A_55_P2145356  | Thada          | Mus musculus mRNA for mKIAA1767 protein.         |
| 2295557 | A_55_P2151521  | ENSMUST0000010 | microfibrillar-associated protein 3 [Source:MG   |
| 2292718 | A_55_P1959639  | LOC100045061   | Unknown                                          |
| 2307321 | A_55_P2054743  | Sh3bgrl2       | Mus musculus SH3 domain binding glutamic a       |
| 2303379 | A_55_P2056973  | Trem12         | Mus musculus triggering receptor expressed c     |
| 2303803 | A_55_P1999691  | Usp27x         | ubiquitin specific peptidase 27, X chromosom     |
| 2261528 | A_55_P2007233  | ENSMUST0000006 | PREDICTED: Mus musculus Riken cDNA A53           |
| 2274870 | A_55_P2167521  | Gm15503        | Mus musculus 16 days neonate thymus cDNA         |
| 2306017 | A_30_P01025698 | A_30_P01025698 | lincRNA:chr10:122410471-122422759 revers         |
| 2260520 | A_55_P1964332  | LOC100048239   | Unknown                                          |
| 2285616 | A_55_P2120650  | LOC100047155   | Unknown                                          |
| 2297554 | A_55_P2003309  | Gm2073         | Unknown                                          |
| 2298365 | A_52_P565575   | Arhgap20       | Mus musculus Rho GTPase activating protein       |
| 2259438 | A_55_P1981929  | Scg5           | Mus musculus secretogranin V (Scg5), mRNA        |
| 2302035 | A_55_P1953508  | Mobkl2c        | Mus musculus MOB kinase activator 3C (Mob3       |
| 2257397 | A_52_P104091   | Slc25a27       | Mus musculus solute carrier family 25, membe     |
| 2300886 | A_66_P107483   | Trem12         | Mus musculus triggering receptor expressed c     |
| 2281872 | A_51_P305532   | Eif2s3x        | Mus musculus eukaryotic translation initiation   |
| 2260440 | A_55_P2170225  | Sh3bgrl2       | Mus musculus SH3 domain binding glutamic a       |
| 2303472 | A_66_P111090   | Sctr           | Mus musculus secretin receptor (Sctr), mRNA      |
| 2297274 | A_55_P2007234  | ENSMUST0000006 | PREDICTED: Mus musculus Riken cDNA A53           |
| 2289855 | A_51_P182728   | Stx1a          | Mus musculus syntaxin 1A (brain) (Stx1a), mR     |
| 2301960 | A_30_P01027042 | A_30_P01027042 | lincRNA:chr11:120041124-120052299 revers         |
| 2288869 | A_52_P509965   | Ager           | Mus musculus advanced glycosylation end pr       |
| 2270548 | A_52_P108850   | St8sia1        | Mus musculus ST8 alpha-N-acetyl-neuramidid       |
| 2281384 | A_51_P412225   | Tbc1d16        | Mus musculus TBC1 domain family, member 1        |
| 2291057 | A_55_P2045129  | Gm4361         | Mus musculus adult male thymus cDNA, RIKE        |
| 2265157 | A_52_P590535   | Fbln2          | Mus musculus fibulin 2 (Fbln2), transcript varia |
| 2270323 | A_30_P01030905 | A_30_P01030905 | lincRNA:chr15:85300937-85301522 forward s        |
| 2291523 | A_55_P2022519  | Tmem108        | Mus musculus transmembrane protein 108 (Tr       |
| 2268971 | A_55_P1985890  | Tiparp         | Mus musculus TCDD-inducible poly(ADP-ribos       |
| 2280739 | A_52_P64687    | Camk2n1        | Mus musculus calcium/calmodulin-dependent        |
| 2261093 | A_51_P518051   | Dusp4          | Mus musculus dual specificity phosphatase 4      |
| 2292111 | A_30_P01022122 | A_30_P01022122 | lincRNA:chr8:19678750-20038750 reverse st        |
| 2301761 | A_52_P283524   | Rcan3          | Mus musculus regulator of calcineurin 3 (Rcar    |
| 2306669 | A_30_P01022858 | A_30_P01022858 | lincRNA:chr4:131737612-131738100 reverse         |
| 2264610 | A_55_P2286493  | 4933405E24Rik  | Mus musculus RIKEN cDNA 4933405E24 ger           |
| 2291561 | A_55_P2159850  | Gm4191         | 603275854F1 NCI_CGAP_Mam3 Mus muscu              |
| 2264814 | A_52_P478394   | Dleu7          | Mus musculus deleted in lymphocytic leukemia     |
| 2309359 | A_66_P108003   | Espn           | Mus musculus espin (Espn), transcript variant    |
| 2268077 | A_55_P1994309  | Ptgir          | Mus musculus prostaglandin I receptor (IP) (P    |
| 2265319 | A_55_P2091601  | Col11a2        | Mus musculus collagen, type XI, alpha 2 (Col     |
| 2261343 | A_55_P2024046  | Slc16a5        | Mus musculus solute carrier family 16 (monoc     |

|         |                |                |                                                 |
|---------|----------------|----------------|-------------------------------------------------|
| 2312367 | A_55_P2007205  | ENSMUST0000006 | predicted pseudogene 10749 [Source:MGI S        |
| 2299634 | A_55_P2025755  | Syce1l         | Mus musculus synaptonemal complex central       |
| 2296586 | A_55_P2113738  | Gm4102         | AV573893 Abe mouse ES cell Mus musculus         |
| 2284432 | A_55_P2156905  | Sox5           | Mus musculus SRY-box containing gene 5 (S       |
| 2258300 | A_55_P2096121  | Gm2528         | Unknown                                         |
| 2261843 | A_51_P443819   | 2610034M16Rik  | Mus musculus RIKEN cDNA 2610034M16 gen          |
| 2292229 | A_55_P2004168  | LOC100046325   | Unknown                                         |
| 2306039 | A_55_P2017789  | Il4ra          | Mus musculus interleukin 4 receptor, alpha (Il  |
| 2299042 | A_55_P2084890  | C2cd2l         | Mus musculus C2 calcium-dependent domain        |
| 2259334 | A_55_P1993858  | Rmrp           | Mus musculus RNA component of mitochondr        |
| 2283668 | A_55_P2092156  | Gm2911         | Unknown                                         |
| 2282383 | A_55_P2040774  | Gm6837         | Unknown                                         |
| 2281140 | A_55_P2135526  | Gzmc           | Mus musculus granzyme C (Gzmc), mRNA [NM        |
| 2281039 | A_30_P01025873 | A_30_P01025873 | lincRNA:chr10:44707451-44707693 reverse s       |
| 2311127 | A_55_P2075449  | Ttll3          | Mus musculus tubulin tyrosine ligase-like famil |
| 2310150 | A_55_P1993483  | Gm7462         | Unknown                                         |
| 2289783 | A_55_P2004881  | D18Ertd653e    | Mus musculus DNA segment, Chr 18, ERATO         |
| 2266365 | A_55_P2159149  | Nsg2           | neuron specific gene family member 2 [Source    |
| 2307063 | A_55_P2005720  | Gm4253         | Unknown                                         |
| 2263518 | A_55_P2021476  | XM_001474821   | Q6TXJ2_RAT (Q6TXJ2) LRRGT00007, partia          |
| 2269832 | A_55_P2044917  | Gpr83          | Mus musculus G protein-coupled receptor 83      |
| 2305092 | A_66_P121583   | Gm7120         | Mus musculus predicted gene 7120 (Gm7120        |
| 2270938 | A_30_P01028003 | A_30_P01028003 | lincRNA:chrX:6950444-6952293 reverse stran      |
| 2262314 | A_55_P2097072  | Gm7219         | Unknown                                         |
| 2296484 | A_30_P01024498 | A_30_P01024498 | lincRNA:chr13:28506971-28511732 reverse s       |
| 2274282 | A_30_P01030979 | A_30_P01030979 | lincRNA:chr10:120336296-120354471 revers        |
| 2260042 | A_51_P434758   | Fam83e         | Mus musculus family with sequence similarity 8  |
| 2288082 | A_30_P01027441 | A_30_P01027441 | lincRNA:chr13:28506971-28511732 reverse s       |
| 2279738 | A_51_P471791   | St8sia6        | Mus musculus ST8 alpha-N-acetyl-neuraminid      |
| 2276748 | A_30_P01021556 | A_30_P01021556 | lincRNA:chr8:19678750-20038750 forward st       |
| 2291650 | A_55_P2097219  | Gbp1           | Mus musculus guanylate binding protein 1 (G     |
| 2275270 | A_55_P1986680  | Gm2334         | Unknown                                         |
| 2289249 | A_52_P629895   | Adh1           | Mus musculus alcohol dehydrogenase 1 (clas      |
| 2300284 | A_30_P01021222 | A_30_P01021222 | lincRNA:chr17:8718223-8949898 forward stra      |
| 2309177 | A_55_P2179604  | Vash1          | Mus musculus vasohibin 1 (Vash1), mRNA [NI      |
| 2266013 | A_30_P01021493 | A_30_P01021493 | lincRNA:chr3:93564825-93576725 forward st       |
| 2294141 | A_55_P1954276  | Emid1          | Mus musculus EMI domain containing 1 (Emid      |
| 2280892 | A_51_P382369   | Zfp608         | Mus musculus zinc finger protein 608 (Zfp608    |
| 2292220 | A_55_P2000354  | Rgs11          | Mus musculus regulator of G-protein signaling   |
| 2275135 | A_51_P419389   | Bmpr2          | Mus musculus bone morphogenic protein rece      |
| 2257193 | A_55_P2024366  | Raver2         | Mus musculus ribonucleoprotein, PTB-binding     |
| 2278795 | A_30_P01031078 | A_30_P01031078 | lincRNA:chr4:45079022-45096897 reverse st       |
| 2292045 | A_55_P2007630  | Sez6l2         | Mus musculus seizure related 6 homolog like     |
| 2289113 | A_51_P480013   | Car11          | Mus musculus carbonic anhydrase 11 (Car11)      |
| 2286929 | A_30_P01020222 | A_30_P01020222 | lincRNA:chr4:62367014-62386800 forward st       |
| 2310472 | A_55_P2074045  | Gm3655         | Q8VKJ6_MYCTU (Q8VKJ6) PE_PGRS family            |
| 2258681 | A_65_P16059    | Tgfbr3         | Mus musculus transforming growth factor, bet    |
| 2275961 | A_52_P546459   | Ube2d1         | Mus musculus ubiquitin-conjugating enzyme E     |
| 2265884 | A_30_P01032768 | A_30_P01032768 | lincRNA:chr11:99048975-99062425 reverse s       |
| 2267983 | A_55_P2105452  | Foxp1          | Mus musculus forkhead box P1 (Foxp1), trans     |
| 2262856 | A_30_P01030720 | A_30_P01030720 | lincRNA:chr10:62267317-62269871 reverse s       |
| 2304915 | A_30_P01032149 | A_30_P01032149 | lincRNA:chr14:73729977-73751877 reverse s       |
| 2261471 | A_55_P2161400  | Sctr           | Mus musculus secretin receptor (Sctr), mRNA     |
| 2267790 | A_51_P363749   | Irf6           | Mus musculus interferon regulatory factor 6 (I  |
| 2309282 | A_51_P418809   | Aim            | Mus musculus antisense Igf2r RNA (Aim), tran    |
| 2288204 | A_55_P1964004  | Gm3521         | BY456555 RIKEN full-length enriched, adult r    |

| ANOVA p-value | Adjusted ANOVA p-value | Tukey p-value | Fold change | Log2 ratio | Median | wt_non-stim_1 | wt_non-stim_2 | wt_non-stim_3 |
|---------------|------------------------|---------------|-------------|------------|--------|---------------|---------------|---------------|
| 1,26E-19      | 4,38E-16               | 2,26E-14      | -1619,127   | -10,661    | 10,425 | 4,432         | 4,248         | 4,223         |
| 4,28E-04      | 1,39E-03               | 3,50E-03      | -38,479     | -5,266     | 13,324 | 0,193         | -0,022        | 1,055         |
| 4,09E-04      | 1,34E-03               | 3,46E-03      | -26,373     | -4,721     | 13,815 | 0,315         | -0,030        | 1,024         |
| 1,48E-17      | 8,83E-15               | 2,34E-14      | -12,915     | -3,691     | 3,846  | 1,876         | 1,563         | 1,550         |
| 1,93E-12      | 5,27E-11               | 1,73E-10      | -9,292      | -3,216     | 2,221  | 3,218         | 3,987         | 3,684         |
| 3,93E-16      | 7,93E-14               | 4,35E-14      | -7,803      | -2,964     | 9,485  | 1,584         | 1,704         | 1,810         |
| 7,70E-07      | 4,13E-06               | 7,00E-06      | -6,648      | -2,733     | 2,511  | 2,254         | 2,209         | 2,529         |
| 3,97E-12      | 9,31E-11               | 7,09E-08      | -6,021      | -2,590     | 3,594  | 3,414         | 3,092         | 3,213         |
| 1,62E-08      | 1,24E-07               | 1,72E-05      | -5,812      | -2,539     | 5,013  | 0,072         | -0,265        | -0,566        |
| 4,68E-06      | 2,16E-05               | 2,25E-03      | -5,724      | -2,517     | 4,800  | -0,144        | -1,212        | -0,286        |
| 1,84E-11      | 3,36E-10               | 4,44E-09      | -5,307      | -2,408     | 6,844  | 1,812         | 2,027         | 1,884         |
| 8,36E-17      | 2,89E-14               | 9,71E-09      | -5,077      | -2,344     | 6,113  | 3,829         | 3,835         | 3,883         |
| 9,68E-14      | 4,65E-12               | 5,84E-09      | -5,049      | -2,336     | 4,732  | 2,696         | 2,732         | 2,887         |
| 1,59E-07      | 9,82E-07               | 1,85E-02      | -4,928      | -2,301     | 8,962  | 4,887         | 5,658         | 4,321         |
| 1,39E-07      | 8,68E-07               | 2,51E-05      | -4,510      | -2,173     | 3,768  | 0,072         | -0,483        |               |
| 1,72E-04      | 6,02E-04               | 5,47E-04      | -4,478      | -2,163     | 2,008  | 2,029         | 2,470         | 0,058         |
| 2,20E-12      | 5,81E-11               | 5,26E-07      | -4,463      | -2,158     | 3,934  | 3,659         | 3,580         | 4,095         |
| 2,50E-04      | 8,48E-04               | 1,96E-03      | -4,365      | -2,126     | 3,462  | 1,313         | -0,075        | 1,023         |
| 1,19E-11      | 2,32E-10               | 3,11E-09      | -4,353      | -2,122     | 9,361  | 2,081         | 2,086         | 2,083         |
| 1,19E-11      | 2,32E-10               | 3,75E-09      | -4,296      | -2,103     | 9,841  | 2,002         | 2,060         | 2,088         |
| 1,10E-05      | 4,74E-05               | 3,14E-04      | -4,272      | -2,095     | 2,907  | 1,495         | 2,006         | 2,407         |
| 2,63E-16      | 6,03E-14               | 2,67E-06      | -4,243      | -2,085     | 9,146  | 4,039         | 3,987         | 4,053         |
| 1,74E-14      | 1,27E-12               | 1,35E-08      | -4,228      | -2,080     | 8,074  | 2,634         | 2,887         | 2,792         |
| 1,45E-07      | 9,02E-07               | 3,53E-04      | -3,992      | -1,997     | 2,679  | 2,779         | 2,217         | 2,694         |
| 1,00E-03      | 3,06E-03               | 9,18E-04      | -3,972      | -1,990     | 3,412  | 0,945         | 0,036         | 1,155         |
| 1,46E-10      | 1,98E-09               | 1,63E-09      | -3,945      | -1,980     | 7,163  | 0,475         | 0,705         | 0,782         |
| 1,58E-06      | 7,97E-06               | 3,32E-02      | -3,942      | -1,979     | 3,321  | 1,848         | 3,695         | 3,095         |
| 3,71E-17      | 1,73E-14               | 1,89E-09      | -3,910      | -1,967     | 8,436  | -1,877        | -2,071        | -2,055        |
| 7,50E-08      | 4,96E-07               | 1,81E-06      | -3,834      | -1,939     | 4,084  | 0,228         | 0,487         | 0,607         |
| 8,36E-06      | 3,68E-05               | 3,49E-03      | -3,832      | -1,938     | 4,015  | 0,340         | 0,343         | -0,219        |
| 1,26E-13      | 5,75E-12               | 2,60E-06      | -3,821      | -1,934     | 4,243  | 3,759         | 3,667         | 3,630         |
| 2,14E-06      | 1,05E-05               | 3,19E-06      | -3,750      | -1,907     | 6,794  | 0,818         | 0,680         | 0,557         |
| 2,57E-06      | 1,25E-05               | 1,50E-04      | -3,696      | -1,886     | 3,097  | 2,156         | 2,245         | 2,131         |
| 2,43E-07      | 1,45E-06               | 8,32E-05      | -3,638      | -1,863     | 2,880  | 2,528         | 2,192         | 1,948         |
| 1,96E-02      | 4,66E-02               | 1,92E-02      | -3,613      | -1,853     | 2,982  | 4,146         | 1,849         | 0,024         |
| 4,24E-03      | 1,15E-02               | 2,74E-02      | -3,543      | -1,825     | 8,481  | 0,113         | 0,106         | -0,022        |
| 7,27E-06      | 3,24E-05               | 2,54E-03      | -3,543      | -1,825     | 10,029 | -1,074        | -0,353        | -1,383        |
| 3,78E-07      | 2,16E-06               | 4,85E-06      | -3,489      | -1,803     | 4,748  | 0,311         | 0,390         | 0,774         |
| 1,41E-06      | 7,18E-06               | 8,01E-04      | -3,485      | -1,801     | 4,788  | -0,539        | -0,171        | -0,258        |
| 8,84E-10      | 9,45E-09               | 1,91E-07      | -3,392      | -1,762     | 5,941  | 1,881         | 1,358         | 1,877         |
| 2,94E-10      | 3,63E-09               | 9,36E-04      | -3,313      | -1,728     | 5,290  | -1,369        | -1,225        | -1,270        |
| 3,91E-05      | 1,53E-04               | 1,13E-03      | -3,310      | -1,727     | 2,032  | 1,808         | 1,980         | 2,248         |
| 1,98E-09      | 1,92E-08               | 2,08E-05      | -3,294      | -1,720     | 6,800  | 2,729         | 2,581         | 2,278         |
| 1,44E-05      | 6,06E-05               | 3,24E-03      | -3,272      | -1,710     | 9,924  | -0,956        | -0,182        | -1,445        |
| 5,77E-06      | 2,62E-05               | 4,27E-03      | -3,245      | -1,698     | 2,346  | 1,780         | 1,025         | 2,005         |
| 1,75E-03      | 5,10E-03               | 2,89E-02      | -3,227      | -1,690     | 3,277  | 1,515         | 1,412         | 1,119         |

|          |          |          |        |        |        |        |        |        |
|----------|----------|----------|--------|--------|--------|--------|--------|--------|
| 1,12E-09 | 1,16E-08 | 2,12E-05 | -3,215 | -1,685 | 4,386  | 2,639  | 2,319  | 2,347  |
| 2,46E-03 | 6,99E-03 | 1,80E-03 | -3,198 | -1,677 | 3,530  | 0,821  | 0,819  | 0,099  |
| 1,86E-05 | 7,68E-05 | 8,25E-04 | -3,191 | -1,674 | 4,025  | 1,682  | 1,888  | 1,748  |
| 1,52E-06 | 7,70E-06 | 3,93E-03 | -3,149 | -1,655 | 5,676  | 0,025  | 0,155  | 0,232  |
| 1,16E-08 | 9,24E-08 | 3,33E-03 | -3,130 | -1,646 | 3,827  | 2,447  | 2,435  | 2,661  |
| 1,80E-06 | 8,97E-06 | 2,86E-03 | -3,125 | -1,644 | 8,996  | -1,415 | -0,701 | -1,711 |
| 2,78E-05 | 1,11E-04 | 4,10E-04 | -3,084 | -1,625 | 2,227  | 2,668  | 0,588  | 1,389  |
| 5,41E-08 | 3,68E-07 | 4,33E-05 | -3,065 | -1,616 | 3,016  | 1,533  | 0,196  | 0,764  |
| 6,44E-13 | 2,15E-11 | 2,84E-05 | -3,021 | -1,595 | 3,290  | 2,587  | 2,808  | 2,435  |
| 8,60E-05 | 3,17E-04 | 8,20E-04 | -3,017 | -1,593 | 6,715  | 1,437  | 1,130  | 1,494  |
| 7,51E-16 | 1,24E-13 | 6,62E-08 | -2,971 | -1,571 | 9,641  | 3,474  | 3,498  | 3,579  |
| 1,53E-07 | 9,48E-07 | 2,01E-03 | -2,949 | -1,560 | 8,837  | -1,217 | -0,421 | -1,451 |
| 4,71E-05 | 1,82E-04 | 4,09E-04 | -2,944 | -1,558 | 4,599  | 0,976  | 1,737  | 1,094  |
| 3,55E-05 | 1,40E-04 | 2,04E-03 | -2,940 | -1,556 | 4,840  | 1,659  | 1,691  | 1,440  |
| 1,85E-07 | 1,13E-06 | 9,67E-03 | -2,934 | -1,553 | 4,147  | 2,259  | 2,794  | 2,207  |
| 2,01E-09 | 1,94E-08 | 2,55E-05 | -2,928 | -1,550 | 6,039  | 1,145  | 1,349  | 1,207  |
| 2,68E-03 | 7,56E-03 | 6,66E-03 | -2,906 | -1,539 | 4,888  | 1,321  | 1,532  | 1,824  |
| 3,32E-06 | 1,58E-05 | 1,16E-04 | -2,902 | -1,537 | 6,898  | 0,217  | 0,070  | 0,207  |
| 1,38E-03 | 4,10E-03 | 3,36E-03 | -2,890 | -1,531 | 3,292  | 1,572  | 2,781  | 1,242  |
| 2,43E-07 | 1,45E-06 | 3,59E-04 | -2,890 | -1,531 | 12,796 | -0,988 | -0,510 | -1,448 |
| 5,19E-06 | 2,38E-05 | 1,68E-04 | -2,888 | -1,530 | 7,097  | 1,176  | 0,993  | 0,986  |
| 5,00E-08 | 3,43E-07 | 1,62E-06 | -2,888 | -1,530 | 2,004  | 1,991  | 1,679  | 1,957  |
| 2,88E-08 | 2,08E-07 | 9,11E-07 | -2,886 | -1,529 | 4,472  | 1,493  | 1,330  | 1,345  |
| 1,43E-03 | 4,23E-03 | 4,72E-02 | -2,860 | -1,516 | 3,008  | 1,462  | 0,982  | 1,296  |
| 1,35E-04 | 4,80E-04 | 1,03E-02 | -2,850 | -1,511 | 2,103  | 1,182  | 1,902  | 2,146  |
| 6,96E-14 | 3,67E-12 | 1,74E-05 | -2,823 | -1,497 | 6,044  | 3,405  | 3,507  | 3,360  |
| 2,08E-09 | 2,00E-08 | 2,81E-04 | -2,795 | -1,483 | 8,519  | 2,968  | 3,089  | 2,930  |
| 1,03E-06 | 5,40E-06 | 7,58E-07 | -2,766 | -1,468 | 9,298  | 1,154  | 1,093  | 1,018  |
| 5,21E-07 | 2,89E-06 | 8,41E-04 | -2,749 | -1,459 | 12,123 | -1,073 | -0,508 | -1,528 |
| 1,70E-12 | 4,76E-11 | 1,11E-07 | -2,747 | -1,458 | 10,810 | -0,604 | -0,594 | -0,504 |
| 7,42E-03 | 1,92E-02 | 9,17E-03 | -2,732 | -1,450 | 3,334  | 1,213  | 0,289  | 0,848  |
| 6,54E-06 | 2,94E-05 | 1,68E-03 | -2,732 | -1,450 | 5,541  | 1,800  | 1,622  | 1,641  |
| 3,51E-03 | 9,70E-03 | 2,02E-02 | -2,730 | -1,449 | 4,947  | 0,262  | -0,087 | 0,087  |
| 4,82E-07 | 2,70E-06 | 8,60E-04 | -2,709 | -1,438 | 10,977 | -0,928 | -0,339 | -1,384 |
| 2,47E-08 | 1,81E-07 | 2,08E-06 | -2,700 | -1,433 | 7,365  | 1,622  | 1,331  | 1,780  |
| 1,39E-08 | 1,08E-07 | 1,22E-04 | -2,691 | -1,428 | 9,089  | 1,922  | 2,056  | 2,136  |
| 1,36E-10 | 1,86E-09 | 9,28E-03 | -2,685 | -1,425 | 5,423  | 3,104  | 3,056  | 2,865  |
| 5,17E-09 | 4,48E-08 | 2,39E-04 | -2,680 | -1,422 | 10,036 | 2,238  | 2,135  | 2,234  |
| 1,11E-08 | 8,88E-08 | 3,91E-04 | -2,678 | -1,421 | 2,311  | 3,464  | 3,021  | 3,313  |
| 1,13E-06 | 5,87E-06 | 2,75E-04 | -2,676 | -1,420 | 7,832  | 1,676  | 1,529  | 1,785  |
| 2,29E-07 | 1,37E-06 | 7,85E-04 | -2,674 | -1,419 | 9,061  | -1,056 | -0,388 | -1,423 |
| 3,09E-04 | 1,03E-03 | 1,31E-02 | -2,648 | -1,405 | 3,147  | 1,085  | 1,644  | 1,105  |
| 3,55E-15 | 3,84E-13 | 2,60E-03 | -2,646 | -1,404 | 4,713  | 3,851  | 3,829  | 3,492  |
| 1,75E-08 | 1,33E-07 | 1,19E-04 | -2,635 | -1,398 | 6,496  | 0,013  | 0,001  | 0,310  |
| 2,96E-12 | 7,36E-11 | 6,39E-08 | -2,603 | -1,380 | 5,990  | -0,179 | -0,124 | -0,031 |
| 5,25E-03 | 1,40E-02 | 4,87E-03 | -2,603 | -1,380 | 4,244  | 2,637  | 0,013  | 0,703  |
| 1,25E-13 | 5,71E-12 | 3,23E-09 | -2,588 | -1,372 | 6,752  | 1,765  | 1,695  | 1,865  |
| 4,51E-11 | 7,21E-10 | 1,29E-06 | -2,565 | -1,359 | 6,841  | 1,940  | 1,881  | 1,934  |
| 6,26E-04 | 1,98E-03 | 3,11E-03 | -2,558 | -1,355 | 12,639 | 0,614  | 0,807  | 0,672  |
| 7,22E-13 | 2,36E-11 | 4,10E-03 | -2,539 | -1,344 | 7,258  | 2,460  | 2,874  | 2,862  |
| 2,21E-05 | 9,01E-05 | 1,57E-05 | -2,537 | -1,343 | 8,023  | 0,425  | 0,450  | 0,437  |
| 7,63E-13 | 2,48E-11 | 2,95E-04 | -2,535 | -1,342 | 6,822  | -0,986 | -1,383 | -1,750 |
| 2,11E-05 | 8,63E-05 | 3,01E-02 | -2,530 | -1,339 | 2,800  | 1,507  | 1,277  | 1,378  |
| 5,90E-07 | 3,23E-06 | 4,96E-04 | -2,516 | -1,331 | 11,861 | -0,781 | -0,304 | -1,112 |
| 9,24E-05 | 3,39E-04 | 1,03E-02 | -2,509 | -1,327 | 2,280  | 1,311  | 1,359  | 1,694  |
| 6,05E-08 | 4,08E-07 | 2,50E-02 | -2,502 | -1,323 | 2,344  | 2,212  | 0,770  | 2,098  |

|          |          |          |        |        |        |        |        |        |
|----------|----------|----------|--------|--------|--------|--------|--------|--------|
| 1,71E-07 | 1,05E-06 | 1,98E-02 | -2,495 | -1,319 | 2,981  | 1,565  | 1,783  | 1,994  |
| 2,42E-12 | 6,26E-11 | 6,64E-04 | -2,491 | -1,317 | 4,078  | 2,278  | 2,778  | 2,546  |
| 7,70E-05 | 2,86E-04 | 5,09E-03 | -2,490 | -1,316 | 2,294  | 1,905  | 3,259  | 2,080  |
| 1,20E-02 | 2,98E-02 | 1,30E-02 | -2,486 | -1,314 | 3,236  | 0,185  | 0,859  | 0,993  |
| 4,08E-08 | 2,85E-07 | 4,19E-05 | -2,481 | -1,311 | 8,078  | 1,598  | 1,172  | 1,544  |
| 6,45E-04 | 2,04E-03 | 1,13E-02 | -2,474 | -1,307 | 4,564  | 0,251  | 0,251  | 0,184  |
| 2,81E-08 | 2,04E-07 | 1,52E-04 | -2,471 | -1,305 | 7,445  | 1,990  | 1,881  | 1,646  |
| 2,10E-10 | 2,71E-09 | 4,20E-03 | -2,467 | -1,303 | 3,774  | 2,237  | 2,039  | 1,898  |
| 5,12E-05 | 1,96E-04 | 8,75E-03 | -2,461 | -1,299 | 3,021  | 1,359  | 1,517  | 1,292  |
| 1,52E-03 | 4,48E-03 | 2,86E-02 | -2,455 | -1,296 | 3,082  | 0,950  | 0,598  | 0,680  |
| 2,09E-04 | 7,20E-04 | 1,11E-03 | -2,454 | -1,295 | 5,591  | 0,796  | 0,875  | 0,860  |
| 4,76E-05 | 1,83E-04 | 4,05E-02 | -2,454 | -1,295 | 4,163  | -1,217 | -0,838 | 0,012  |
| 4,77E-13 | 1,68E-11 | 2,27E-07 | -2,450 | -1,293 | 8,661  | 2,008  | 2,004  | 1,968  |
| 5,60E-07 | 3,08E-06 | 2,61E-02 | -2,432 | -1,282 | 3,212  | 2,315  | 1,886  | 2,704  |
| 1,70E-03 | 4,98E-03 | 8,74E-03 | -2,427 | -1,279 | 3,752  | 1,198  | 1,354  | 1,291  |
| 3,62E-07 | 2,08E-06 | 4,73E-04 | -2,422 | -1,276 | 13,561 | -0,858 | -0,505 | -1,329 |
| 8,40E-03 | 2,15E-02 | 1,51E-02 | -2,412 | -1,270 | 3,330  | 0,642  | 0,732  | 1,543  |
| 1,74E-11 | 3,21E-10 | 9,81E-09 | -2,408 | -1,268 | 8,602  | 1,716  | 1,646  | 1,595  |
| 6,78E-05 | 2,54E-04 | 2,98E-03 | -2,402 | -1,264 | 5,009  | 0,217  | 0,028  | 0,144  |
| 7,75E-11 | 1,15E-09 | 1,95E-02 | -2,398 | -1,262 | 6,307  | 3,594  | 3,528  | 3,676  |
| 3,00E-11 | 5,09E-10 | 3,58E-07 | -2,385 | -1,254 | 8,004  | 2,010  | 2,092  | 1,868  |
| 1,48E-03 | 4,37E-03 | 6,69E-03 | -2,382 | -1,252 | 4,473  | 0,120  | 0,401  | 0,258  |
| 8,44E-08 | 5,53E-07 | 1,17E-02 | -2,378 | -1,250 | 8,036  | -1,374 | -0,826 | -1,867 |
| 1,62E-03 | 4,75E-03 | 7,26E-03 | -2,375 | -1,248 | 3,243  | 1,127  | 0,607  | 1,211  |
| 1,00E-06 | 5,25E-06 | 6,07E-04 | -2,359 | -1,238 | 13,481 | -0,803 | -0,297 | -1,240 |
| 1,31E-09 | 1,33E-08 | 2,71E-05 | -2,355 | -1,236 | 8,030  | 1,662  | 1,356  | 1,531  |
| 5,07E-14 | 2,86E-12 | 9,74E-04 | -2,331 | -1,221 | 6,225  | 3,073  | 2,927  | 3,129  |
| 6,58E-03 | 1,72E-02 | 5,32E-03 | -2,326 | -1,218 | 4,164  | 0,740  | -0,006 | 0,604  |
| 2,85E-04 | 9,57E-04 | 4,81E-02 | -2,325 | -1,217 | 4,332  | 1,309  | 1,184  | 1,172  |
| 2,94E-09 | 2,72E-08 | 1,64E-08 | -2,320 | -1,214 | 6,650  | 0,350  | 0,589  | 0,469  |
| 5,26E-14 | 2,94E-12 | 3,39E-10 | -2,315 | -1,211 | 10,697 | -0,311 | -0,422 | -0,208 |
| 1,12E-05 | 4,82E-05 | 1,35E-04 | -2,313 | -1,210 | 4,142  | 0,712  | 1,019  | 1,221  |
| 2,59E-10 | 3,24E-09 | 1,39E-03 | -2,313 | -1,210 | 3,174  | 2,015  | 1,959  | 2,153  |
| 3,74E-13 | 1,37E-11 | 1,96E-04 | -2,312 | -1,209 | 5,873  | 3,304  | 3,352  | 3,406  |
| 7,21E-07 | 3,89E-06 | 1,84E-05 | -2,309 | -1,207 | 7,747  | 1,187  | 1,196  | 1,217  |
| 1,24E-03 | 3,73E-03 | 1,20E-02 | -2,301 | -1,202 | 3,883  | 1,597  | 1,134  | 0,933  |
| 6,71E-03 | 1,75E-02 | 1,81E-02 | -2,297 | -1,200 | 3,677  | 1,315  | 1,020  | 0,793  |
| 7,76E-09 | 6,45E-08 | 4,30E-04 | -2,294 | -1,198 | 7,973  | 1,653  | 1,627  | 1,676  |
| 4,54E-09 | 4,00E-08 | 1,56E-05 | -2,291 | -1,196 | 6,939  | 1,490  | 1,672  | 1,490  |
| 1,49E-12 | 4,30E-11 | 4,99E-05 | -2,282 | -1,190 | 6,474  | -0,886 | -0,644 | -0,995 |
| 6,78E-09 | 5,71E-08 | 1,04E-02 | -2,277 | -1,187 | 5,932  | -1,532 | -0,956 | -0,327 |
| 3,87E-05 | 1,51E-04 | 3,65E-03 | -2,274 | -1,185 | 2,508  | 1,310  | 1,466  | 1,329  |
| 2,50E-11 | 4,36E-10 | 3,49E-06 | -2,272 | -1,184 | 5,678  | 1,541  | 1,288  | 1,501  |
| 1,36E-07 | 8,50E-07 | 5,97E-06 | -2,270 | -1,183 | 8,569  | 1,176  | 1,278  | 1,327  |
| 4,53E-07 | 2,55E-06 | 3,75E-04 | -2,267 | -1,181 | 5,559  | 1,661  | 1,255  | 1,577  |
| 1,08E-06 | 5,63E-06 | 3,59E-06 | -2,266 | -1,180 | 11,910 | 0,552  | 0,340  | 0,101  |
| 7,74E-04 | 2,41E-03 | 2,28E-03 | -2,264 | -1,179 | 3,450  | 0,549  | -0,098 | 0,295  |
| 3,44E-10 | 4,15E-09 | 3,58E-08 | -2,255 | -1,173 | 9,314  | -0,025 | -0,056 | -0,005 |
| 3,17E-03 | 8,84E-03 | 1,15E-02 | -2,255 | -1,173 | 2,895  | 1,404  | 1,451  | 1,167  |
| 4,96E-08 | 3,40E-07 | 9,20E-04 | -2,244 | -1,166 | 5,838  | -1,038 | -0,719 | -1,214 |
| 2,03E-07 | 1,23E-06 | 9,51E-04 | -2,236 | -1,161 | 13,117 | -1,041 | -0,744 | -1,570 |
| 6,38E-07 | 3,47E-06 | 4,05E-02 | -2,231 | -1,158 | 5,298  | -0,796 | -0,868 | -0,261 |
| 1,72E-05 | 7,14E-05 | 1,12E-05 | -2,224 | -1,153 | 8,012  | 0,523  | 0,394  | 0,374  |
| 1,62E-08 | 1,24E-07 | 7,51E-06 | -2,221 | -1,151 | 8,638  | -0,098 | -0,200 | -0,134 |
| 3,57E-07 | 2,05E-06 | 1,05E-02 | -2,211 | -1,145 | 4,749  | 1,377  | 1,335  | 1,463  |
| 3,72E-14 | 2,24E-12 | 2,89E-03 | -2,207 | -1,142 | 6,017  | 3,157  | 3,253  | 3,267  |

|          |          |          |        |        |        |        |        |        |
|----------|----------|----------|--------|--------|--------|--------|--------|--------|
| 8,16E-10 | 8,82E-09 | 3,13E-06 | -2,205 | -1,141 | 7,580  | 1,621  | 1,916  | 1,896  |
| 7,30E-04 | 2,29E-03 | 1,14E-02 | -2,201 | -1,138 | 3,889  | 0,844  | 1,182  | 1,087  |
| 1,65E-10 | 2,20E-09 | 2,21E-04 | -2,193 | -1,133 | 6,178  | 1,723  | 1,862  | 1,776  |
| 4,57E-07 | 2,57E-06 | 9,33E-04 | -2,190 | -1,131 | 13,821 | -0,936 | -0,543 | -1,376 |
| 3,02E-06 | 1,45E-05 | 1,43E-03 | -2,187 | -1,129 | 14,182 | -0,778 | -0,344 | -1,147 |
| 2,48E-06 | 1,21E-05 | 2,79E-03 | -2,187 | -1,129 | 1,970  | 1,643  | 1,620  | 1,985  |
| 1,27E-06 | 6,53E-06 | 8,28E-03 | -2,184 | -1,127 | 7,976  | -0,932 | -0,761 | -1,785 |
| 9,77E-07 | 5,14E-06 | 1,60E-06 | -2,181 | -1,125 | 11,679 | 0,293  | 0,110  | 0,221  |
| 5,58E-04 | 1,78E-03 | 8,12E-03 | -2,175 | -1,121 | 3,620  | 1,315  | 1,245  | 1,081  |
| 1,91E-03 | 5,54E-03 | 6,28E-03 | -2,166 | -1,115 | 10,265 | 0,644  | 0,704  | 0,710  |
| 4,40E-06 | 2,04E-05 | 5,25E-04 | -2,164 | -1,114 | 14,013 | -0,462 | -0,028 | -0,713 |
| 1,19E-06 | 6,16E-06 | 7,20E-04 | -2,160 | -1,111 | 13,810 | -0,699 | -0,345 | -1,094 |
| 7,89E-06 | 3,49E-05 | 1,39E-02 | -2,151 | -1,105 | 8,294  | 0,514  | 0,383  | 0,563  |
| 5,71E-04 | 1,82E-03 | 1,04E-02 | -2,147 | -1,102 | 4,346  | 1,108  | 0,576  | 1,669  |
| 1,49E-06 | 7,56E-06 | 2,91E-03 | -2,135 | -1,094 | 6,039  | 1,133  | 0,886  | 1,156  |
| 3,71E-06 | 1,75E-05 | 1,02E-02 | -2,132 | -1,092 | 7,953  | -0,632 | -0,217 | -1,098 |
| 6,78E-05 | 2,54E-04 | 4,64E-03 | -2,129 | -1,090 | 5,044  | 1,347  | 0,972  | 1,548  |
| 4,99E-08 | 3,42E-07 | 2,86E-02 | -2,127 | -1,089 | 3,368  | 1,920  | 1,666  | 1,867  |
| 6,58E-08 | 4,40E-07 | 3,69E-03 | -2,126 | -1,088 | 7,861  | -1,161 | -0,609 | -1,374 |
| 1,24E-05 | 5,28E-05 | 4,26E-03 | -2,124 | -1,087 | 13,431 | -0,538 | -0,328 | -0,894 |
| 8,47E-06 | 3,73E-05 | 1,15E-04 | -2,124 | -1,087 | 6,700  | 0,271  | -0,185 | 0,061  |
| 1,78E-06 | 8,88E-06 | 8,71E-03 | -2,124 | -1,087 | 6,953  | -0,045 | -0,047 | 0,332  |
| 1,14E-04 | 4,11E-04 | 1,69E-02 | -2,121 | -1,085 | 4,579  | 0,296  | -0,646 | 0,038  |
| 3,42E-03 | 9,47E-03 | 2,98E-02 | -2,116 | -1,081 | 4,099  | 0,305  | 0,121  | -0,233 |
| 2,53E-06 | 1,23E-05 | 3,35E-03 | -2,114 | -1,080 | 2,676  | 1,683  | 2,154  | 2,320  |
| 3,66E-08 | 2,58E-07 | 5,54E-03 | -2,101 | -1,071 | 2,475  | 1,827  | 1,644  | 1,931  |
| 6,67E-05 | 2,50E-04 | 2,46E-03 | -2,099 | -1,070 | 5,328  | 0,022  | -0,058 | -0,222 |
| 1,11E-04 | 4,00E-04 | 3,55E-02 | -2,085 | -1,060 | 2,852  | 1,538  | 1,663  | 1,100  |
| 1,27E-11 | 2,45E-10 | 5,92E-05 | -2,083 | -1,059 | 8,404  | 1,970  | 1,911  | 2,172  |
| 2,41E-04 | 8,20E-04 | 5,87E-04 | -2,081 | -1,057 | 4,299  | 0,230  | 0,783  | 0,421  |
| 1,54E-10 | 2,07E-09 | 1,01E-02 | -2,076 | -1,054 | 3,788  | 2,658  | 2,723  | 2,851  |
| 9,46E-04 | 2,90E-03 | 7,98E-03 | -2,069 | -1,049 | 4,605  | -0,527 | 0,005  | 1,407  |
| 9,81E-11 | 1,41E-09 | 2,13E-04 | -2,069 | -1,049 | 7,215  | 1,910  | 1,786  | 1,815  |
| 9,91E-07 | 5,21E-06 | 1,26E-03 | -2,066 | -1,047 | 5,088  | 1,182  | 1,265  | 1,265  |
| 1,03E-05 | 4,46E-05 | 1,12E-03 | -2,065 | -1,046 | 14,018 | -0,440 | -0,054 | -0,704 |
| 3,52E-05 | 1,39E-04 | 7,74E-05 | -2,061 | -1,043 | 5,108  | 0,265  | 0,133  | 0,061  |
| 2,02E-04 | 6,97E-04 | 4,05E-02 | -2,056 | -1,040 | 4,401  | 1,366  | 0,829  | 1,156  |
| 4,11E-09 | 3,67E-08 | 1,44E-06 | -2,052 | -1,037 | 6,910  | 1,220  | 1,191  | 1,183  |
| 2,52E-06 | 1,22E-05 | 2,73E-03 | -2,051 | -1,036 | 5,799  | 0,899  | 1,202  | 1,346  |
| 4,32E-05 | 1,67E-04 | 1,71E-03 | -2,049 | -1,035 | 7,398  | -0,143 | 0,333  | -0,013 |
| 6,82E-09 | 5,74E-08 | 1,31E-03 | -2,046 | -1,033 | 6,199  | 1,641  | 1,685  | 1,570  |
| 2,68E-08 | 1,95E-07 | 8,55E-05 | -2,043 | -1,031 | 5,206  | 1,264  | 1,292  | 0,904  |
| 4,01E-10 | 4,74E-09 | 1,01E-03 | -2,043 | -1,031 | 6,840  | 1,810  | 1,767  | 1,707  |
| 6,29E-08 | 4,22E-07 | 2,52E-04 | -2,038 | -1,027 | 6,071  | 1,129  | 1,236  | 1,268  |
| 6,49E-09 | 5,49E-08 | 2,52E-02 | -2,034 | -1,024 | 3,588  | 1,568  | 1,264  | 1,589  |
| 8,43E-03 | 2,16E-02 | 1,52E-02 | -2,031 | -1,022 | 5,135  | 0,665  | 0,062  | 0,379  |
| 2,93E-08 | 2,11E-07 | 2,46E-06 | -2,029 | -1,021 | 8,675  | 0,925  | 1,098  | 1,052  |
| 3,65E-03 | 1,01E-02 | 3,06E-03 | -2,028 | -1,020 | 5,374  | 0,576  | 0,507  | 0,660  |
| 1,30E-10 | 1,79E-09 | 1,44E-03 | -2,022 | -1,016 | 4,533  | 2,113  | 1,656  | 1,565  |
| 9,89E-06 | 4,30E-05 | 3,04E-04 | -2,022 | -1,016 | 8,692  | 0,901  | 0,704  | 0,738  |
| 2,56E-04 | 8,67E-04 | 4,99E-02 | -2,011 | -1,008 | 4,785  | 3,421  | 0,725  | 1,109  |
| 8,05E-12 | 1,68E-10 | 8,40E-04 | -2,008 | -1,006 | 4,057  | 3,012  | 2,427  | 3,040  |
| 2,65E-07 | 1,56E-06 | 2,57E-02 | -2,006 | -1,004 | 2,796  | 1,657  | 1,290  | 2,094  |
| 4,79E-08 | 3,30E-07 | 3,20E-07 | -2,006 | -1,004 | 8,962  | 0,914  | 0,899  | 0,955  |
| 1,86E-04 | 6,47E-04 | 5,77E-04 | -2,006 | -1,004 | 4,939  | 0,964  | 0,619  | 0,642  |
| 2,41E-13 | 9,67E-12 | 1,57E-04 | -2,000 | -1,000 | 4,059  | 2,267  | 1,841  | 2,285  |



| wt_non-stim_4 | wt_non-stim_21 | CD4creGARPII-fl_non-stim_22 | CD4creGARPII-fl_non-stim_23 | CD4creGARPII-fl_non-stim_8 | CD4creGARPII-fl_non-stim_9 | CD4creGARPII-fl_non-stim_10 | wt_stim_11 | wt_stim_12 | wt_stim_13 | wt_stim_14 |
|---------------|----------------|-----------------------------|-----------------------------|----------------------------|----------------------------|-----------------------------|------------|------------|------------|------------|
| 4,092         | 4,351          | -6,339                      | -6,465                      | -6,413                     | -6,052                     | -7,275                      | 4,042      | 3,853      | 4,000      | 3,538      |
| 0,844         | 0,308          | -4,485                      | -5,691                      | 0,022                      | -4,958                     | -6,331                      | 0,064      | -0,054     | 0,931      | 0,553      |
| 0,832         | 0,409          | -3,932                      | -5,281                      | 0,030                      | -4,312                     | -5,653                      | 0,081      | -0,155     | 0,926      | 0,518      |
| 1,784         | 1,972          | -1,923                      | -1,935                      | -1,907                     | -1,892                     | -1,550                      | 1,874      | 2,156      | 1,935      | 2,452      |
| 4,028         | 2,627          | 0,242                       | 0,552                       | 0,467                      | 0,397                      | 0,611                       | -0,253     | -0,267     | -0,260     | -0,248     |
| 1,794         | 1,430          | -1,335                      | -0,987                      | -1,259                     | -0,897                     | -1,426                      | 1,137      | 1,210      | 1,141      | 1,156      |
| 1,225         | 2,752          | -0,022                      | 1,007                       | -0,526                     | -0,522                     | -0,479                      | 0,644      | -0,034     | 0,022      | 0,184      |
| 3,011         | 3,948          | 1,204                       | 0,624                       | 0,597                      | 1,257                      | 0,167                       | -1,022     | -0,565     | -0,603     | -1,225     |
| -0,591        | 0,139          | -2,946                      | -1,366                      | -2,840                     | -2,591                     | -2,804                      | 1,511      | 1,483      | 1,509      | 1,756      |
| -1,535        | 0,174          | -1,819                      | -0,968                      | -2,807                     | -2,803                     | -2,822                      | -0,117     | 0,318      | 0,641      | 0,228      |
| 1,718         | 1,894          | -0,576                      | 0,103                       | -0,351                     | -0,524                     | -0,529                      | 0,077      | 0,066      | -0,066     | 0,259      |
| 3,789         | 3,532          | 0,765                       | 1,485                       | 1,691                      | 1,654                      | 1,357                       | -1,443     | -1,490     | -1,256     | -0,765     |
| 2,584         | 3,298          | 0,577                       | 0,451                       | 0,397                      | 0,288                      | 0,204                       | -0,779     | -0,884     | -0,899     | -1,323     |
| 4,228         | 4,674          | 1,924                       | 3,557                       | 3,253                      | 2,373                      | 0,157                       | -1,263     | -0,157     | -0,762     | -0,815     |
| 0,722         | 0,415          | -1,614                      | -1,438                      | -1,950                     | -1,929                     | -1,937                      | 0,951      | 1,348      | 1,198      | 1,481      |
| 2,577         | 2,158          | -0,075                      | 0,132                       | -0,033                     | 0,019                      | -0,005                      | -0,036     | -0,063     | -0,036     | -0,076     |
| 3,623         | 4,016          | 1,500                       | 1,536                       | 1,179                      | 1,918                      | 0,398                       | -1,188     | -1,890     | -0,398     | -0,692     |
| 1,003         | 0,075          | -0,758                      | -1,178                      | -1,122                     | -0,580                     | -1,487                      | 0,127      | 0,518      | 0,438      | 0,277      |
| 1,882         | 2,041          | -0,220                      | 0,366                       | 0,083                      | -0,040                     | -0,333                      | 0,018      | -0,018     | -0,123     | 0,299      |
| 1,909         | 2,117          | -0,341                      | 0,339                       | -0,028                     | -0,043                     | -0,322                      | 0,028      | 0,060      | -0,168     | 0,273      |
| 1,816         | 2,740          | -0,727                      | 1,052                       | -0,088                     | 0,576                      | -1,002                      | 0,583      | 0,098      | -0,292     | -0,114     |
| 4,158         | 3,919          | 1,090                       | 1,955                       | 2,197                      | 2,176                      | 1,665                       | -1,142     | -1,266     | -1,090     | -1,120     |
| 2,868         | 3,293          | 0,992                       | 1,189                       | 0,788                      | 0,672                      | 0,321                       | -0,896     | -0,849     | -0,777     | -0,973     |
| 2,504         | 1,651          | -0,489                      | 0,507                       | 1,474                      | 1,365                      | 0,472                       | -0,744     | -0,734     | -0,718     | -0,734     |
| 1,410         | 0,775          | -1,045                      | -1,256                      | -0,993                     | 0,305                      | -1,149                      | -0,203     | 0,280      | -1,122     | -1,181     |
| 0,941         | 0,568          | -1,077                      | -1,592                      | -0,932                     | -1,274                     | -1,279                      | 0,822      | 0,977      | 0,720      | 0,917      |
| 3,595         | 1,086          | -0,228                      | 1,115                       | 1,014                      | 2,195                      | 1,521                       | -0,858     | -0,012     | 0,012      | -1,517     |
| -1,860        | -1,345         | -3,845                      | -3,525                      | -4,185                     | -3,625                     | -4,058                      | 1,760      | 1,734      | 1,871      | 2,043      |
| 0,458         | 0,514          | -2,118                      | -1,236                      | -1,773                     | -1,452                     | -0,953                      | 0,673      | 0,516      | 0,889      | 1,105      |
| 0,548         | -0,357         | -1,040                      | -1,598                      | -2,029                     | -2,054                     | -0,109                      | 1,561      | 1,544      | 1,508      | 1,247      |
| 3,839         | 3,536          | 0,953                       | 1,829                       | 2,189                      | 1,732                      | 1,087                       | -2,348     | -2,363     | -2,352     | -2,368     |
| 0,711         | 0,527          | -1,226                      | -0,502                      | -1,676                     | -0,815                     | -1,615                      | 0,678      | 0,258      | 0,720      | -0,130     |
| 1,983         | 1,307          | -0,244                      | 0,409                       | 0,244                      | 0,529                      | -0,908                      | -0,966     | -0,933     | -0,863     | -0,941     |
| 2,273         | 2,430          | 1,087                       | 1,015                       | 0,410                      | 0,183                      | -0,856                      | -0,858     | -0,204     | -0,624     | -0,858     |
| 0,778         | -0,024         | -1,097                      | -1,091                      | -1,076                     | 0,086                      | -1,067                      | -0,507     | -0,353     | -0,571     | -0,930     |
| 0,035         | 0,022          | -1,789                      | -5,049                      | -1,402                     | -0,364                     | -4,872                      | 0,737      | 0,838      | 0,699      | 0,961      |
| -0,567        | 0,380          | -2,393                      | -1,879                      | -1,534                     | -2,852                     | -3,588                      | 0,290      | 0,352      | 0,350      | 0,100      |
| 0,758         | 0,566          | -1,237                      | -1,531                      | -0,964                     | -0,849                     | -1,626                      | 0,613      | 1,102      | 0,386      | 0,383      |
| -0,366        | 0,461          | -1,186                      | -1,203                      | -2,191                     | -2,058                     | -2,284                      | 0,427      | 0,849      | 1,301      | 0,919      |
| 1,768         | 1,539          | -0,146                      | 0,285                       | 0,250                      | 0,006                      | -0,639                      | -0,155     | 0,172      | 0,489      | -0,006     |
| -0,896        | -1,720         | -3,071                      | -2,692                      | -2,998                     | -1,330                     | -3,154                      | 0,896      | 1,309      | 0,970      | 1,205      |
| 1,911         | 0,496          | 0,185                       | 0,526                       | -0,057                     | 1,201                      | -0,073                      | 0,027      | -0,050     | -0,054     | 0,378      |
| 2,888         | 2,388          | 0,015                       | 0,722                       | 1,522                      | 1,040                      | 0,861                       | -0,491     | -0,182     | -0,360     | -0,015     |
| -0,496        | 0,513          | -2,205                      | -1,799                      | -1,495                     | -2,793                     | -3,385                      | 0,230      | 0,346      | 0,384      | 0,032      |
| 2,243         | 1,982          | 0,218                       | -0,536                      | 1,059                      | 0,284                      | 1,557                       | -0,538     | -0,530     | -0,173     | -0,537     |
| 1,519         | 0,191          | -0,278                      | -0,442                      | 0,779                      | 0,502                      | -0,974                      | -0,103     | -0,932     | 0,136      | -1,097     |

|        |        |        |        |        |        |        |        |        |        |        |
|--------|--------|--------|--------|--------|--------|--------|--------|--------|--------|--------|
| 2,709  | 2,027  | 0,467  | 1,109  | 0,790  | 0,662  | 0,153  | -0,734 | -1,448 | -0,153 | -1,587 |
| 1,969  | 0,206  | -0,304 | -0,415 | -1,714 | -1,693 | -0,858 | -0,214 | -0,025 | 1,063  | 0,496  |
| 1,338  | 1,656  | 0,009  | -0,009 | 0,622  | -0,569 | 0,246  | 0,203  | -0,293 | -2,029 | -0,135 |
| -0,636 | -0,817 | -0,676 | -1,630 | -1,519 | -1,952 | -2,339 | 1,842  | 1,820  | 2,081  | 1,040  |
| 2,657  | 2,665  | 0,603  | 1,011  | 1,096  | 2,078  | 0,079  | -1,854 | -1,875 | -0,102 | -1,641 |
| -0,994 | 0,095  | -2,638 | -2,283 | -1,978 | -3,006 | -4,020 | 0,264  | 0,352  | 0,347  | 0,151  |
| 2,714  | 1,639  | -0,003 | 0,403  | 0,661  | 0,014  | -0,121 | -0,135 | -0,150 | -0,063 | -0,171 |
| 0,638  | 1,085  | -0,853 | -1,026 | -1,213 | -0,271 | -0,849 | 1,860  | 1,492  | 1,660  | 1,455  |
| 2,891  | 3,051  | 2,330  | 1,666  | 1,158  | 1,213  | 0,977  | -1,185 | -1,150 | -1,183 | -1,200 |
| 1,444  | 0,698  | -0,477 | -0,057 | 0,057  | -0,156 | -0,820 | 0,266  | 0,102  | 0,216  | -0,253 |
| 3,590  | 3,412  | 1,039  | 1,974  | 2,056  | 1,927  | 1,472  | -1,039 | -1,119 | -1,140 | -1,126 |
| -0,656 | -0,006 | -2,216 | -1,737 | -1,820 | -2,326 | -2,559 | 0,752  | 0,654  | 0,787  | 0,478  |
| 0,893  | 1,736  | -0,464 | -0,637 | -0,621 | 0,371  | 0,106  | -0,051 | -0,053 | 0,306  | 0,223  |
| 0,992  | 1,142  | -1,422 | -0,116 | -0,016 | -0,724 | 0,621  | 0,185  | 0,094  | 0,137  | -0,552 |
| 1,480  | 2,807  | 0,186  | 1,055  | 1,057  | -0,099 | 0,706  | -2,359 | -2,349 | -2,357 | -1,137 |
| 1,542  | 1,301  | -0,571 | 0,016  | -0,248 | 0,186  | -0,472 | 0,162  | -0,217 | 0,124  | -0,016 |
| 1,812  | 1,307  | -0,654 | 0,007  | -0,007 | 0,135  | -0,393 | -0,468 | 0,140  | 0,018  | -0,580 |
| -0,268 | -0,959 | -1,642 | -1,483 | -0,957 | -1,176 | -1,467 | 0,364  | 0,118  | 0,294  | 0,215  |
| 0,927  | 1,149  | -0,023 | 0,448  | -0,290 | -1,147 | -1,238 | 0,734  | 0,854  | 0,821  | -0,212 |
| -0,585 | 0,021  | -2,116 | -1,727 | -1,687 | -2,450 | -3,005 | 0,362  | 0,333  | 0,235  | 0,198  |
| 1,128  | 1,170  | -0,254 | 0,053  | -0,455 | -0,401 | -0,796 | 0,200  | 1,695  | 0,381  | -0,053 |
| 1,901  | 1,764  | -0,120 | 0,371  | 0,719  | 0,554  | -0,110 | -0,089 | -0,105 | -0,096 | -0,095 |
| 1,367  | 1,382  | 0,140  | 0,425  | -0,162 | -0,337 | -0,399 | -0,734 | -0,217 | -0,355 | -0,596 |
| 1,841  | 0,511  | -0,307 | 0,766  | -0,220 | 1,161  | -0,991 | 0,060  | 0,154  | 0,565  | -0,577 |
| 2,196  | 2,740  | 0,153  | 1,852  | -0,220 | 0,673  | 0,636  | -0,232 | -0,230 | -0,215 | -0,229 |
| 3,700  | 3,028  | 1,066  | 1,909  | 2,393  | 2,117  | 1,554  | -1,532 | -1,463 | -1,066 | -1,644 |
| 3,580  | 2,648  | 0,032  | 1,486  | 2,179  | 1,999  | 1,471  | -0,456 | -0,261 | -0,395 | -0,032 |
| 1,125  | 0,449  | -0,587 | -0,375 | -0,288 | -0,333 | -0,702 | 0,199  | 0,067  | 0,084  | -0,067 |
| -0,677 | 0,088  | -2,135 | -1,749 | -1,767 | -2,510 | -3,149 | 0,360  | 0,355  | 0,364  | 0,165  |
| -0,528 | -0,491 | -2,501 | -1,985 | -1,781 | -1,793 | -2,839 | 1,224  | 1,218  | 1,187  | 1,254  |
| 1,152  | 0,333  | -0,430 | -1,259 | -0,502 | -0,603 | -1,564 | -0,701 | 0,687  | 1,179  | 1,233  |
| 2,216  | 1,140  | -0,987 | 0,103  | 0,556  | 0,584  | 0,191  | -0,363 | -0,348 | -0,103 | 0,504  |
| 0,813  | 0,385  | -1,187 | -1,194 | -1,770 | 0,299  | -0,889 | 0,354  | 0,419  | 0,980  | 0,900  |
| -0,546 | 0,151  | -1,983 | -1,583 | -1,565 | -2,210 | -2,849 | 0,506  | 0,415  | 0,552  | 0,294  |
| 1,317  | 1,420  | -0,508 | 0,103  | 0,246  | -0,013 | -1,009 | 0,013  | -0,152 | 0,204  | -0,255 |
| 2,590  | 1,540  | -0,204 | 0,628  | 1,144  | 1,018  | 0,371  | -0,291 | -0,141 | -0,257 | 0,141  |
| 2,418  | 2,117  | 1,440  | 1,526  | 1,436  | 1,503  | 1,255  | -1,255 | -1,816 | -2,233 | -2,350 |
| 2,714  | 2,021  | -0,030 | 0,812  | 1,281  | 1,086  | 0,625  | -0,388 | -0,201 | -0,195 | 0,030  |
| 3,558  | 2,960  | 1,336  | 1,918  | 1,893  | 2,542  | -0,019 | -0,419 | -0,435 | -0,423 | 0,019  |
| 1,716  | 0,886  | -0,467 | 0,256  | 0,666  | 0,618  | 0,056  | -0,056 | -0,277 | -0,298 | 0,176  |
| -0,634 | 0,041  | -2,053 | -1,936 | -1,756 | -2,384 | -3,090 | 0,562  | 0,611  | 0,536  | 0,382  |
| 1,456  | 1,229  | 0,370  | -1,320 | -1,324 | 1,146  | -0,176 | -1,306 | -0,901 | -1,313 | -1,308 |
| 4,034  | 3,114  | 1,996  | 2,385  | 3,033  | 3,360  | 2,425  | -2,670 | -1,996 | -2,622 | -2,668 |
| -0,606 | -0,176 | -0,743 | -1,723 | -1,532 | -1,397 | -1,278 | 1,470  | 1,541  | 1,616  | 0,641  |
| 0,025  | 0,050  | -1,414 | -0,949 | -1,162 | -1,546 | -1,411 | 1,335  | 1,316  | 1,368  | 1,509  |
| 0,512  | 0,214  | -0,888 | -0,256 | -1,088 | -0,583 | -0,868 | 0,332  | 0,477  | 0,213  | 0,837  |
| 1,475  | 1,938  | 0,085  | 0,393  | 0,460  | 0,519  | 0,053  | -0,053 | -0,342 | -0,237 | -0,409 |
| 1,981  | 1,751  | 0,186  | 0,681  | 0,686  | 0,576  | 0,231  | -0,799 | -0,880 | -0,778 | -0,822 |
| 1,201  | 0,578  | -1,823 | -0,823 | 0,039  | 0,088  | -0,683 | -0,272 | -0,039 | 0,069  | 0,322  |
| 3,160  | 1,852  | 1,518  | 1,828  | 1,488  | 2,112  | 1,385  | -1,652 | -2,047 | -1,817 | -1,631 |
| 0,426  | 0,099  | -0,928 | -0,357 | -0,917 | -0,734 | -1,024 | -0,007 | 0,139  | 0,112  | -0,345 |
| -1,383 | -1,741 | -2,748 | -2,725 | -2,365 | -2,128 | -3,317 | 1,895  | 2,106  | 2,026  | 2,511  |
| 1,530  | 0,655  | 0,636  | 1,116  | -0,039 | -0,232 | 0,039  | -0,712 | -0,940 | -0,928 | -0,927 |
| -0,397 | 0,193  | -1,728 | -1,314 | -1,470 | -2,101 | -2,642 | 0,378  | 0,448  | 0,420  | 0,238  |
| 1,502  | 0,199  | 0,032  | -0,032 | 0,964  | 0,365  | -0,316 | -0,510 | 0,141  | -0,510 | -0,511 |
| 2,055  | 2,121  | 1,530  | 1,658  | 0,506  | 0,725  | 0,775  | -0,506 | -0,522 | -0,513 | -0,518 |

|        |        |        |        |        |        |        |        |        |        |        |
|--------|--------|--------|--------|--------|--------|--------|--------|--------|--------|--------|
| 2,070  | 1,081  | 0,464  | -0,030 | 1,380  | 1,565  | 0,334  | 0,030  | -0,945 | -0,908 | -0,966 |
| 2,670  | 1,826  | 1,229  | 1,409  | 1,143  | 1,576  | 0,910  | -1,192 | -2,076 | -2,058 | -0,910 |
| 1,764  | 2,230  | -0,264 | 1,446  | 0,764  | 1,498  | -0,250 | -0,259 | -0,268 | -0,263 | 0,202  |
| 0,340  | 1,066  | -1,100 | 0,167  | -0,444 | -0,455 | -0,845 | 0,140  | -0,230 | 0,629  | -0,052 |
| 1,652  | 1,615  | 0,393  | 0,922  | 0,287  | 0,257  | -0,195 | -0,229 | -0,538 | -0,229 | -0,520 |
| -0,470 | -0,118 | -1,124 | -0,412 | -1,202 | -1,509 | -1,108 | 1,041  | 0,416  | 0,760  | -0,268 |
| 2,016  | 1,029  | -0,071 | 0,577  | 0,928  | 0,860  | 0,552  | 0,046  | -0,247 | -0,046 | -0,229 |
| 1,638  | 2,141  | 0,395  | 0,736  | 1,402  | 1,248  | 0,599  | -1,569 | -2,000 | -0,907 | -0,395 |
| 0,961  | 1,197  | -0,096 | -0,405 | -0,008 | 0,124  | 0,939  | -0,938 | -0,985 | 0,008  | -1,010 |
| 1,581  | 0,772  | 0,018  | 0,675  | -0,719 | -0,524 | -0,705 | 0,196  | -0,848 | -0,018 | -1,298 |
| 1,196  | 0,588  | -0,472 | -0,435 | -0,151 | 0,422  | -0,488 | 0,021  | -0,021 | 0,143  | 0,204  |
| -0,078 | -0,258 | -1,552 | -1,903 | -1,894 | -1,005 | -0,248 | 0,060  | 0,215  | -0,012 | 0,333  |
| 2,084  | 1,881  | 0,130  | 0,738  | 0,711  | 0,989  | 0,586  | -0,617 | -0,287 | -0,402 | -0,130 |
| 2,435  | 1,962  | 0,931  | 1,033  | 1,603  | 1,803  | -0,305 | -0,364 | -0,371 | -0,934 | -0,978 |
| 0,815  | 0,648  | 0,298  | -0,169 | -0,082 | -0,068 | -0,104 | -0,827 | -0,138 | 0,832  | 0,005  |
| -0,567 | 0,033  | -1,842 | -1,640 | -1,461 | -2,382 | -2,875 | 0,310  | 0,400  | 0,261  | 0,224  |
| 1,190  | 0,532  | -1,149 | -0,456 | 0,037  | -1,315 | -0,539 | -1,029 | -1,027 | 0,517  | -0,037 |
| 1,832  | 1,560  | 0,013  | 0,473  | 0,409  | 0,378  | -0,280 | -0,013 | -0,154 | 0,044  | -0,391 |
| -0,141 | -0,606 | -2,287 | -1,237 | -0,599 | -1,666 | -0,688 | 0,721  | 0,335  | 0,660  | 0,155  |
| 3,971  | 3,569  | 1,159  | 2,332  | 2,778  | 2,774  | 2,139  | -2,454 | -1,159 | -2,247 | -1,184 |
| 1,832  | 1,686  | 0,319  | 0,634  | 0,614  | 0,801  | -0,030 | -0,246 | -0,244 | -0,031 | 0,030  |
| 0,341  | -0,805 | -1,597 | -0,994 | -1,419 | -0,599 | -0,143 | 0,267  | 0,280  | -0,137 | 0,245  |
| -0,826 | -0,131 | -2,076 | -1,906 | -1,856 | -2,189 | -2,670 | 0,823  | 0,853  | 0,954  | 0,492  |
| 1,426  | 1,185  | 0,266  | -0,352 | -0,494 | -0,063 | 0,015  | -0,423 | -1,076 | 0,593  | -0,015 |
| -0,462 | 0,170  | -1,700 | -1,499 | -1,397 | -2,223 | -2,804 | 0,307  | 0,345  | 0,288  | 0,232  |
| 1,293  | 1,619  | 0,149  | 0,881  | 0,295  | 0,449  | -0,149 | -0,238 | -0,396 | -0,335 | -0,561 |
| 3,104  | 2,491  | 1,234  | 1,853  | 2,364  | 2,415  | 1,743  | -1,799 | -1,853 | -1,448 | -1,262 |
| 0,595  | -0,059 | -0,258 | -0,894 | -0,743 | -0,056 | -0,623 | -0,152 | 0,324  | 0,076  | 0,175  |
| 1,587  | 1,399  | 0,202  | 0,819  | 0,091  | -0,092 | 0,013  | -0,727 | -0,503 | -0,464 | -0,013 |
| 0,464  | 0,270  | -0,818 | -0,750 | -0,558 | -0,740 | -0,903 | 0,596  | 0,297  | 0,202  | 0,203  |
| -0,221 | -0,378 | -1,264 | -1,674 | -1,692 | -1,522 | -1,320 | 0,515  | 0,476  | 0,641  | 0,666  |
| 1,004  | 0,970  | -0,206 | -0,038 | 0,133  | -0,338 | -1,073 | 0,136  | 0,431  | -0,478 | 0,038  |
| 1,900  | 1,676  | 1,222  | 0,749  | 0,452  | 1,617  | 0,302  | -1,286 | -1,300 | -1,292 | -1,295 |
| 3,856  | 3,185  | 1,182  | 2,143  | 2,542  | 2,399  | 1,801  | -1,518 | -1,938 | -1,894 | -1,182 |
| 1,234  | 0,453  | -0,255 | -0,011 | 0,233  | 0,011  | -0,481 | -0,132 | 0,021  | 0,063  | 0,341  |
| 1,537  | 1,184  | 0,018  | -0,018 | -1,637 | 0,776  | -0,115 | -1,095 | 0,241  | -0,924 | 0,392  |
| 0,921  | 0,572  | -0,104 | -0,282 | -0,570 | -0,256 | -0,279 | -1,238 | 0,149  | -0,830 | -0,472 |
| 1,903  | 1,536  | -0,145 | 0,455  | 0,763  | 0,807  | 0,211  | -0,460 | -0,466 | -0,265 | -0,222 |
| 1,797  | 1,561  | 0,150  | 0,673  | 0,365  | 0,679  | -0,053 | -0,312 | -0,704 | -0,428 | -0,730 |
| -0,679 | -0,785 | -2,277 | -1,614 | -1,989 | -1,819 | -1,974 | 1,658  | 1,954  | 1,746  | 2,291  |
| -1,332 | -0,684 | -2,144 | -1,637 | -1,423 | -2,271 | -3,229 | 1,902  | 1,855  | 1,751  | 1,111  |
| 1,317  | 1,665  | 0,144  | 1,328  | -0,677 | -0,537 | 0,411  | 0,127  | -0,690 | -0,120 | -0,685 |
| 1,475  | 1,175  | 0,114  | 0,291  | 0,516  | 0,522  | 0,231  | -0,114 | -0,601 | -0,317 | -0,603 |
| 1,301  | 0,824  | -0,540 | 0,201  | 0,094  | 0,313  | -0,090 | 0,032  | -0,181 | -0,032 | -0,285 |
| 1,473  | 1,073  | -0,152 | 0,840  | 0,292  | 0,135  | 0,295  | -0,214 | -0,294 | -0,104 | -0,500 |
| -0,019 | -0,337 | -1,630 | -1,079 | -0,897 | -0,757 | -1,101 | 0,135  | 0,163  | 0,200  | -0,022 |
| 0,008  | 0,302  | -0,819 | -0,291 | -0,885 | -1,612 | -1,619 | 0,253  | 0,785  | 0,530  | 0,651  |
| -0,041 | 0,052  | -0,851 | -1,002 | -1,376 | -1,199 | -1,714 | 0,470  | 0,520  | 0,516  | 0,496  |
| 0,936  | 0,666  | -0,006 | 0,006  | 0,185  | -0,404 | -1,027 | -1,018 | -1,037 | 0,507  | -1,035 |
| -1,162 | 0,166  | -2,146 | -2,026 | -2,204 | -2,882 | -2,764 | 1,035  | 0,499  | 1,208  | 0,932  |
| -0,560 | -0,032 | -1,906 | -1,813 | -1,689 | -2,438 | -2,990 | 0,385  | 0,486  | 0,346  | 0,261  |
| -1,084 | -0,595 | -1,069 | -0,841 | -1,954 | -2,374 | -2,984 | 1,596  | 1,710  | 1,747  | 1,818  |
| 0,417  | 0,056  | -0,845 | -0,367 | -0,759 | -0,745 | -1,025 | 0,030  | 0,077  | 0,151  | -0,388 |
| -0,054 | -0,047 | -1,505 | -0,707 | -1,249 | -1,145 | -1,272 | 1,094  | 0,427  | 0,504  | 0,213  |
| 1,479  | 0,982  | 0,154  | 0,760  | 0,146  | 0,678  | 0,231  | -0,972 | -0,790 | -0,297 | -0,714 |
| 3,858  | 2,795  | 1,768  | 2,065  | 2,669  | 2,623  | 2,111  | -2,013 | -2,010 | -1,768 | -2,656 |

|        |        |        |        |        |        |        |        |        |        |        |
|--------|--------|--------|--------|--------|--------|--------|--------|--------|--------|--------|
| 2,000  | 1,544  | 0,392  | 0,970  | 0,763  | 0,755  | -0,048 | -0,168 | -0,306 | -0,111 | -0,142 |
| 0,901  | 0,964  | -0,175 | 0,535  | -1,006 | 0,418  | -0,623 | -1,066 | -0,026 | 0,071  | -1,242 |
| 1,540  | 1,999  | 0,865  | 1,286  | 0,643  | 0,451  | 0,253  | -0,494 | -0,487 | -0,565 | -0,253 |
| -0,602 | -0,003 | -1,732 | -1,582 | -1,507 | -2,325 | -2,786 | 0,282  | 0,334  | 0,231  | 0,226  |
| -0,430 | 0,104  | -1,560 | -1,347 | -1,217 | -2,115 | -2,705 | 0,169  | 0,268  | 0,206  | 0,175  |
| 2,104  | 2,503  | 0,134  | 0,855  | 1,628  | 1,435  | -0,159 | -0,162 | -0,157 | 0,185  | -0,157 |
| -0,340 | -0,091 | -1,734 | -1,888 | -1,421 | -2,126 | -2,707 | 0,497  | 0,622  | 0,437  | 0,195  |
| 0,350  | 0,011  | -0,991 | -0,587 | -0,590 | -0,905 | -1,317 | 0,119  | -0,019 | 0,097  | -0,300 |
| 1,064  | 0,310  | 0,426  | -0,050 | 0,268  | -0,041 | -0,949 | -0,309 | -0,389 | -0,328 | -0,564 |
| 0,329  | -0,241 | -0,639 | -1,108 | -0,053 | -0,137 | -0,470 | 0,386  | 0,185  | 0,053  | 0,214  |
| -0,238 | 0,322  | -1,352 | -1,010 | -0,984 | -1,633 | -2,189 | 0,265  | 0,300  | 0,184  | 0,157  |
| -0,450 | 0,134  | -1,561 | -1,371 | -1,239 | -2,082 | -2,576 | 0,270  | 0,285  | 0,231  | 0,228  |
| 0,651  | 0,574  | -0,641 | -0,126 | -0,172 | -0,542 | -0,825 | -1,309 | -1,362 | -1,436 | -1,784 |
| 0,445  | 1,329  | 0,146  | 0,904  | -0,126 | -0,659 | 0,005  | -0,722 | -0,356 | -0,005 | 0,087  |
| 1,295  | 1,559  | 0,355  | 0,791  | 0,049  | 0,062  | -0,049 | -0,554 | -0,435 | -0,597 | -0,860 |
| -0,138 | 0,000  | -1,309 | -1,453 | -0,976 | -1,299 | -1,576 | 0,541  | 0,352  | 0,539  | 0,207  |
| 1,218  | 0,983  | -0,053 | 0,852  | 0,596  | 0,128  | -0,630 | -0,388 | -0,217 | -0,153 | -0,552 |
| 1,972  | 1,904  | -0,025 | 0,816  | 1,519  | 1,319  | 0,571  | -1,498 | -1,500 | -1,485 | -0,007 |
| -0,691 | -0,069 | -1,512 | -1,780 | -1,654 | -2,136 | -2,472 | 0,855  | 0,478  | 0,785  | 0,594  |
| -0,226 | 0,313  | -1,415 | -0,921 | -0,842 | -1,562 | -2,013 | 0,289  | 0,255  | 0,233  | 0,133  |
| 0,127  | 0,018  | -1,026 | -0,978 | -0,937 | -1,124 | -2,344 | 0,491  | 0,650  | 0,694  | 0,075  |
| -0,335 | -0,257 | -0,499 | -1,174 | -0,616 | -1,583 | -1,134 | 1,575  | 1,416  | 1,692  | 1,010  |
| -1,223 | -0,015 | -1,100 | -1,032 | -0,778 | -1,235 | -2,123 | 0,638  | 0,512  | 0,168  | 0,655  |
| -0,143 | -0,014 | -1,420 | 0,014  | -1,095 | -0,615 | -1,893 | 0,295  | 0,405  | -0,110 | 0,017  |
| 2,092  | 1,629  | -0,111 | 1,012  | 1,460  | 1,025  | -0,533 | -0,789 | -0,774 | -0,766 | -0,009 |
| 1,876  | 1,750  | 0,371  | 2,055  | 0,756  | 1,055  | 0,364  | -0,432 | -0,419 | -0,385 | -0,426 |
| 0,647  | -0,638 | -0,622 | -1,300 | -0,753 | -1,724 | -1,128 | -0,066 | -0,022 | 0,044  | 0,279  |
| 1,133  | 1,521  | 0,164  | 0,841  | 0,461  | 0,919  | -0,931 | -0,526 | -0,908 | -0,915 | -0,164 |
| 2,233  | 2,018  | 0,315  | 1,006  | 1,058  | 0,960  | 0,614  | -0,656 | -0,986 | -0,673 | -0,315 |
| 0,839  | 0,193  | -0,405 | -0,364 | -0,810 | -1,367 | -0,636 | 0,111  | 0,571  | 0,147  | 0,495  |
| 2,675  | 3,138  | 2,408  | 2,262  | 1,171  | 1,670  | 0,453  | -0,453 | -1,885 | -1,887 | -1,899 |
| -0,618 | 0,323  | -0,846 | -2,340 | -1,000 | -1,189 | -1,044 | 0,574  | 0,147  | 0,797  | -0,156 |
| 1,848  | 1,610  | 0,228  | 0,766  | 0,963  | 1,318  | 0,240  | -0,971 | -0,472 | -0,522 | -0,228 |
| 1,214  | 1,082  | 0,590  | 0,049  | 0,031  | 0,168  | 0,182  | -0,031 | -0,432 | -1,260 | -0,690 |
| -0,183 | 0,344  | -1,230 | -0,916 | -0,900 | -1,656 | -2,209 | 0,237  | 0,264  | 0,256  | 0,237  |
| 0,284  | 0,003  | -1,009 | -0,398 | -0,187 | -0,910 | -0,933 | 0,255  | 0,285  | 0,105  | -0,003 |
| 1,015  | 1,318  | -0,415 | 0,972  | 0,115  | 0,431  | -0,024 | -0,800 | 0,154  | -0,767 | 0,024  |
| 1,224  | 1,143  | -0,007 | 0,385  | 0,154  | 0,440  | -0,232 | 0,007  | -0,074 | 0,164  | -0,367 |
| 1,554  | 0,893  | 0,216  | 0,437  | 0,166  | 0,079  | -0,079 | -1,288 | -0,157 | -0,343 | -0,483 |
| 0,212  | 0,260  | -0,844 | -0,219 | -0,823 | -0,604 | -0,874 | 0,366  | 0,199  | 0,577  | 0,261  |
| 1,423  | 1,618  | 0,397  | 0,584  | 0,892  | 0,969  | 0,246  | -0,622 | -0,383 | -0,579 | -0,648 |
| 0,882  | 1,228  | 0,667  | -0,001 | 0,068  | 0,197  | 0,232  | -0,221 | -0,486 | -0,045 | 0,001  |
| 2,013  | 1,071  | 0,735  | 1,012  | 0,944  | 0,642  | 0,479  | -1,498 | -0,626 | -0,713 | -0,743 |
| 1,011  | 0,991  | 0,007  | 0,101  | 0,358  | 0,232  | 0,031  | -0,186 | -0,152 | -0,886 | -0,286 |
| 1,842  | 0,943  | 0,369  | 0,544  | 0,999  | 0,860  | 0,515  | -1,651 | -1,077 | -0,853 | -1,636 |
| 0,521  | -0,170 | -0,895 | -0,281 | 0,053  | -0,643 | -1,424 | -0,052 | 0,017  | 0,188  | 0,415  |
| 1,229  | 0,650  | -0,312 | -0,013 | 0,294  | 0,306  | 0,032  | -0,140 | 0,013  | -0,146 | 0,020  |
| 0,574  | 0,501  | -0,170 | 0,468  | -0,530 | -0,446 | -0,937 | 0,005  | 0,062  | -0,012 | 0,108  |
| 1,770  | 1,875  | 0,390  | 0,755  | 1,130  | 0,885  | 0,611  | -1,140 | -0,789 | -0,504 | -0,438 |
| 0,803  | 0,525  | -0,874 | -0,278 | 0,210  | -0,186 | -0,698 | 0,215  | 0,359  | 0,186  | 0,405  |
| 0,871  | 1,364  | -0,241 | 0,578  | 0,008  | 0,244  | 0,101  | -1,195 | -0,454 | -0,732 | 0,172  |
| 2,724  | 2,438  | 0,818  | 1,718  | 1,728  | 1,961  | 1,050  | -1,859 | -1,710 | -1,278 | -1,866 |
| 1,950  | 1,684  | 0,065  | 1,078  | 0,634  | 1,791  | 0,680  | -0,822 | -1,006 | -0,309 | -0,235 |
| 1,131  | 0,892  | -0,497 | 0,098  | -0,089 | -0,045 | -0,620 | 0,236  | 0,045  | 0,233  | -0,099 |
| 0,529  | 1,085  | -0,471 | 0,137  | -0,161 | -0,362 | -1,188 | 0,089  | 0,435  | 0,435  | 0,006  |
| 2,173  | 2,040  | 0,999  | 1,173  | 1,215  | 1,182  | 0,779  | -0,779 | -1,876 | -1,935 | -1,960 |

| wt_stim_15 | CD4creGARPII-fl_stim_24 | CD4creGARPII-fl_stim_25 | CD4creGARPII-fl_stim_18 | CD4creGARPII-fl_stim_19 | CD4creGARPII-fl_stim_20 | Refseq       | GeneID    |
|------------|-------------------------|-------------------------|-------------------------|-------------------------|-------------------------|--------------|-----------|
| 3,707      | -3,751                  | -3,538                  | -3,994                  | -4,058                  | -4,571                  | NM_001113379 | 434215    |
| 0,905      | -4,340                  | -5,221                  | 0,526                   | -4,469                  | -5,653                  |              |           |
| 0,906      | -3,899                  | -4,805                  | 0,453                   | -4,118                  | -5,167                  | NM_133362    | 170942    |
| 2,155      | -1,889                  | -1,677                  | -1,870                  | -1,859                  | -1,862                  | NM_178165    | 229499    |
| -0,242     | -0,260                  | -0,247                  | -0,278                  | -0,285                  | -0,252                  | NM_175475    | 232174    |
| 0,897      | -1,520                  | -1,685                  | -1,513                  | -1,760                  | -1,632                  | NM_001083318 | 27049     |
| 0,902      | -0,535                  | -0,510                  | -0,523                  | -0,524                  | -0,505                  |              |           |
| -0,167     | -1,164                  | -1,755                  | -1,745                  | -1,739                  | -1,736                  | NM_026323    | 67701     |
| 1,030      | 0,179                   | -0,210                  | 1,474                   | 0,342                   | -0,072                  |              |           |
| 0,385      | 0,475                   | 0,741                   | 0,117                   | 0,854                   | 0,660                   | NM_001101431 | 70291     |
| 0,535      | -1,172                  | -1,344                  | -2,213                  | -1,429                  | -1,497                  | NM_173786    | 223672    |
| -2,086     | -4,279                  | -4,279                  | -4,269                  | -4,262                  | -4,259                  | NM_001162938 | 100033459 |
| -0,204     | -2,658                  | -2,595                  | -1,815                  | -2,385                  | -2,608                  | NM_026323    | 67701     |
| -3,004     | -0,382                  | -2,445                  | -4,390                  | -1,631                  | -2,904                  | XM_357633    |           |
| 0,918      | 0,000                   | -0,161                  | -1,117                  | 0,400                   | -0,632                  |              |           |
| -0,007     | -0,090                  | 0,005                   | 0,018                   | -0,088                  | 1,056                   | NM_007769    | 12945     |
| -0,612     | -1,889                  | -1,819                  | -1,829                  | -1,891                  | -1,838                  | NM_021400    | 96875     |
| 0,780      | -1,474                  | -1,462                  | 0,606                   | -1,456                  | -1,442                  | NM_172525    | 214137    |
| 0,779      | -0,920                  | -0,910                  | -1,260                  | -1,251                  | -1,219                  | NM_173786    | 223672    |
| 0,697      | -0,876                  | -1,020                  | -1,429                  | -1,477                  | -1,390                  | NM_001168660 | 71898     |
| -0,994     | -1,019                  | 0,088                   | -1,007                  | -1,017                  | -1,016                  |              |           |
| -1,843     | -6,770                  | -5,372                  | -7,106                  | -6,505                  | -6,224                  | NM_001162938 | 100033459 |
| -0,321     | -2,845                  | -2,317                  | -2,153                  | -2,197                  | -2,250                  | NM_001033460 | 381738    |
| -0,727     | -0,746                  | -0,737                  | -0,735                  | -0,162                  | 0,162                   |              |           |
| -0,036     | -0,268                  | 0,246                   | 0,342                   | -0,057                  | 0,506                   | NM_013879    | 29867     |
| 0,423      | -0,989                  | -0,423                  | -0,552                  | -0,437                  | -0,683                  |              |           |
| -0,688     | -1,500                  | -1,506                  | -1,506                  | -1,486                  | -1,501                  | NM_022420    | 64297     |
| 1,885      | 1,547                   | 1,861                   | 1,345                   | 1,578                   | 1,434                   | NM_134066    | 105349    |
| 0,940      | -0,846                  | -0,228                  | -1,466                  | -0,360                  | -1,177                  | NM_175414    | 109246    |
| 1,231      | -0,014                  | 0,014                   | -1,015                  | -1,197                  | 0,228                   |              |           |
| -2,303     | -0,953                  | -2,359                  | -2,338                  | -2,413                  | -2,381                  | NM_001033303 | 229665    |
| 0,610      | -0,142                  | -0,334                  | -0,611                  | 0,130                   | -0,735                  | NM_001162476 | 20897     |
| -0,613     | 0,932                   | -0,251                  | 0,483                   | -0,921                  | -0,764                  |              |           |
| -0,832     | -0,385                  | -0,825                  | -0,183                  | 0,317                   | -0,836                  | NM_175206    | 74165     |
| 0,610      | -0,462                  | 0,082                   | 1,787                   | 0,836                   | 0,463                   |              |           |
| 0,765      | -0,960                  | -3,231                  | -0,355                  | 0,371                   | -3,419                  | NM_001167883 | 99696     |
| 1,588      | 1,297                   | 0,037                   | 0,883                   | -0,037                  | 0,264                   | NM_009946    | 12890     |
| 0,243      | -1,675                  | -0,243                  | -0,755                  | -1,092                  | -0,982                  |              |           |
| 2,159      | -0,452                  | 0,179                   | 0,743                   | 0,515                   | 0,171                   | NM_010180    | 14114     |
| -0,190     | -1,032                  | -1,163                  | -0,760                  | -0,751                  | -1,136                  | NM_008606    | 17385     |
| 1,417      | 1,567                   | 1,169                   | 0,933                   | 1,073                   | 0,912                   | NM_009189    | 20471     |
| -0,044     | -0,067                  | -0,036                  | -0,054                  | -0,059                  | -0,027                  | NM_053216    | 112418    |
| -1,233     | -0,923                  | -0,852                  | -0,750                  | -0,765                  | -0,290                  | NM_010517    | 16010     |
| 1,578      | 1,326                   | 0,058                   | 0,915                   | -0,032                  | 0,232                   |              |           |
| -0,529     | -0,516                  | 0,173                   | -0,527                  | -0,506                  | -0,520                  |              |           |
| -0,982     | -0,192                  | 0,103                   | 0,195                   | -1,158                  | -0,988                  | NM_144906    | 73094     |

|        |        |        |        |        |        |              |           |
|--------|--------|--------|--------|--------|--------|--------------|-----------|
| -1,195 | -1,263 | -1,134 | -0,779 | -0,405 | -0,639 | NM_175206    | 74165     |
| 0,025  | 0,196  | 0,416  | -0,416 | -0,743 | -0,691 |              |           |
| -0,281 | -0,299 | -0,546 | 0,048  | -0,667 | -0,327 | NM_029464    | 75860     |
| 0,506  | 0,709  | -0,097 | -0,025 | 0,376  | -0,029 | NM_001177666 | 633640    |
| -0,079 | -1,649 | -1,809 | -1,789 | -1,893 | -1,879 | NM_019707    | 12554     |
| 1,664  | 1,239  | -0,022 | 0,984  | 0,022  | 0,212  |              |           |
| 0,062  | -0,181 | -0,004 | -0,017 | 0,003  | -0,068 | XM_889664    | 625123    |
| 1,648  | -1,209 | -0,196 | -1,210 | -0,283 | -1,205 | NM_178405    | 98660     |
| -1,030 | -1,175 | -1,000 | -1,005 | -1,153 | -0,977 | NM_010259    | 14468     |
| -0,921 | -1,064 | -0,938 | 0,503  | -0,617 | -1,268 | NM_031183    | 83395     |
| -1,533 | -2,464 | -1,876 | -2,399 | -2,112 | -2,425 | NM_001162938 | 100033459 |
| 1,881  | 0,869  | 0,216  | 0,921  | 0,006  | 0,147  |              |           |
| -0,672 | -0,611 | -0,436 | -1,504 | -0,457 | 0,051  | NM_001014900 | 332934    |
| 0,016  | -1,998 | -0,674 | -1,049 | -2,358 | -0,442 | NM_001164518 | 210094    |
| -2,354 | -0,706 | -2,353 | -2,344 | 0,099  | -2,340 |              |           |
| 0,338  | -2,884 | -1,942 | -1,830 | -1,269 | -1,790 | NM_138665    | 192166    |
| -0,523 | -0,334 | -0,418 | 2,400  | -0,815 | -0,516 | NM_001039546 | 17920     |
| 0,087  | 0,428  | 0,218  | -0,070 | -0,088 | -0,269 | NM_152804    | 20620     |
| -1,186 | -0,241 | -0,238 | -1,197 | -1,256 | 0,023  |              | 19085     |
| 1,088  | 0,379  | 0,051  | 0,456  | 0,008  | -0,008 |              | 12890     |
| 0,219  | -0,422 | -0,783 | -0,989 | -0,855 | -1,114 | NM_008923    | 19085     |
| -0,086 | 0,882  | 0,086  | -0,121 | -0,128 | -0,104 | NM_175176    | 209601    |
| -0,703 | 0,441  | -0,288 | -0,140 | 0,220  | 0,338  | NM_011347    | 20344     |
| -0,974 | -0,978 | -0,524 | -0,946 | -0,060 | -0,938 | NM_028955    | 74466     |
| 1,455  | -0,240 | -0,237 | -0,153 | -0,243 | -0,243 |              |           |
| -1,172 | -1,914 | -2,035 | -2,360 | -2,816 | -2,004 |              | 216505    |
| -0,467 | -0,827 | -0,749 | -0,919 | -0,680 | -0,654 | NM_019417    | 30794     |
| -0,507 | 0,105  | 0,227  | -0,313 | -0,128 | -0,337 | NM_013749    | 27279     |
| 1,225  | 0,598  | 0,093  | 0,493  | -0,013 | 0,013  | NM_009946    | 12890     |
| 1,092  | 0,491  | 0,763  | 0,906  | 0,818  | 0,596  | NM_001167996 | 68725     |
| -0,569 | -0,941 | 0,065  | -0,065 | 0,297  | -1,564 | NM_172525    | 214137    |
| -0,905 | -1,531 | -1,988 | -0,488 | -0,705 | -0,728 | NM_173744    | 72148     |
| -0,266 | -0,980 | -0,729 | -0,972 | 0,556  | -0,948 |              |           |
| 1,347  | 0,548  | 0,227  | 0,456  | -0,001 | 0,001  |              |           |
| 0,045  | -1,428 | -1,005 | -0,654 | -0,749 | -1,201 | NM_008606    | 17385     |
| -0,320 | -1,325 | -1,406 | -0,594 | -0,826 | -0,681 | NM_173744    | 72148     |
| -3,138 | -1,511 | -1,465 | -3,212 | -1,922 | -1,766 | NM_010423    | 15213     |
| -0,718 | -2,145 | -1,591 | -0,745 | -0,815 | -1,115 | NM_011703    | 22354     |
| -0,377 | -0,413 | -0,325 | -0,412 | -0,043 | -0,452 | NR_044988    | 621335    |
| -0,695 | -0,965 | -0,385 | -0,527 | -0,061 | -0,582 | NM_026878    | 68939     |
| 1,539  | 0,667  | 0,217  | 1,003  | -0,041 | 0,194  |              |           |
| -1,311 | 0,176  | -1,190 | 0,390  | -1,336 | 0,215  | NM_008746    | 18213     |
| -2,599 | -2,672 | -2,613 | -2,635 | -2,180 | -2,637 |              | 791369    |
| 1,204  | 0,303  | -0,016 | -0,001 | 0,236  | -0,150 | XR_106831    | 100044171 |
| 0,989  | 0,223  | -0,025 | 0,086  | 0,401  | -0,033 |              |           |
| -0,070 | -0,707 | 0,303  | -0,307 | -0,527 | -0,013 | NM_022030    | 64051     |
| -0,455 | -1,121 | -1,311 | -1,110 | -1,323 | -1,032 | NM_172507    | 212531    |
| -0,360 | -0,186 | -0,905 | -1,031 | -1,265 | -0,695 |              |           |
| 0,096  | -1,666 | -1,384 | -0,232 | -0,390 | -0,690 | NM_029723    | 76747     |
| -1,385 | -1,690 | -2,201 | -1,813 | -2,672 | -1,868 |              | 217151    |
| 0,604  | 0,278  | 0,007  | -0,149 | -0,284 | -0,354 | NM_207687    | 56226     |
| 1,456  | 1,180  | 1,301  | 1,523  | 1,466  | 0,986  |              |           |
| -0,933 | 0,529  | -0,930 | -0,774 | 0,274  | -0,943 | NM_001033343 | 240667    |
| 1,146  | 0,471  | 0,173  | 0,405  | 0,024  | -0,024 | XM_001474842 |           |
| -0,506 | -0,505 | 0,205  | -0,503 | -0,231 | -0,500 | NM_178241    | 227288    |
| -0,509 | -0,535 | -0,516 | -0,521 | -0,550 | -0,528 | XR_105427    |           |

|        |        |        |        |        |        |              |           |
|--------|--------|--------|--------|--------|--------|--------------|-----------|
| -0,878 | -0,962 | -0,886 | -0,902 | -0,951 | -0,907 |              | 100038516 |
| -0,999 | -2,108 | -2,035 | -2,043 | -2,098 | -2,062 |              |           |
| -0,202 | -0,256 | -0,222 | -0,238 | 1,296  | -0,237 |              | 70858     |
| -1,031 | 0,052  | -0,417 | -1,377 | -0,610 | 0,334  |              |           |
| -0,971 | -0,016 | -0,050 | -0,478 | -0,274 | 0,016  | NM_001081120 | 69627     |
| 0,725  | -0,027 | 0,027  | -1,337 | 0,186  | 0,085  | NR_028311    | 100043335 |
| -0,381 | -0,700 | -0,721 | -0,300 | -0,405 | -0,341 | NM_022019    | 63953     |
| -2,004 | -1,986 | -2,001 | -1,997 | -1,987 | -1,995 |              |           |
| -0,298 | 0,392  | 0,088  | -0,928 | -0,994 | -0,932 |              |           |
| 0,189  | -1,287 | -1,289 | 0,145  | -1,272 | -0,627 |              |           |
| -0,609 | -1,078 | -0,481 | -0,515 | -0,151 | 0,183  | NM_001195437 | 235634    |
| 0,186  | 0,661  | 0,486  | 0,609  | 0,373  | 0,383  |              |           |
| -0,877 | -1,360 | -1,337 | -1,313 | -1,205 | -1,394 | NM_177292    | 320916    |
| -1,360 | -1,340 | -1,341 | -1,363 | 0,305  | -1,349 |              | 240174    |
| -0,945 | 0,314  | -0,005 | 0,366  | -0,118 | -0,744 |              | 216760    |
| 1,002  | 0,291  | 0,034  | 0,392  | -0,001 | 0,001  |              |           |
| -1,229 | -0,306 | 0,311  | 2,169  | -0,448 | 0,224  | NM_172507    | 212531    |
| -0,034 | -0,677 | -0,644 | -0,618 | -0,578 | -0,588 | NM_001033405 | 328833    |
| 0,649  | -0,031 | -0,096 | 0,091  | 0,868  | -0,028 |              | 54651     |
| -3,313 | -3,400 | -2,329 | -2,622 | -1,760 | -3,477 | XR_035179    | 330578    |
| -0,074 | -1,293 | -0,995 | -0,513 | -0,814 | -1,028 |              |           |
| 0,522  | -0,087 | 0,087  | -0,132 | 0,247  | -0,150 |              |           |
| 1,998  | 0,850  | 0,306  | 0,980  | 0,131  | 0,328  |              |           |
| -0,386 | 0,631  | 0,350  | -0,903 | -0,086 | -0,871 |              |           |
| 0,989  | 0,354  | 0,095  | 0,424  | 0,013  | -0,013 |              |           |
| 0,260  | -1,045 | -0,858 | -0,924 | -0,957 | -1,335 | NM_175535    | 244867    |
| -1,234 | -1,914 | -2,275 | -2,057 | -1,940 | -2,479 | NM_009162    | 20394     |
| 0,420  | -0,639 | -0,434 | 0,325  | 0,006  | 0,289  | NM_175308    | 100465    |
| -1,701 | -0,204 | 0,361  | -2,216 | -0,194 | -0,775 | NM_028711    | 74011     |
| 0,671  | -0,310 | -0,549 | -0,480 | -0,202 | -0,290 | NM_001033405 | 328833    |
| 0,590  | 0,208  | 0,217  | 0,381  | 0,362  | 0,288  | NM_012010    | 26905     |
| 0,478  | -0,475 | -0,931 | -0,964 | -0,538 | -0,265 | NM_172507    | 212531    |
| -1,284 | -1,308 | -1,295 | -1,312 | -1,334 | -0,302 | NM_001012322 | 319229    |
| -1,285 | -1,854 | -1,207 | -1,721 | -1,757 | -2,268 | XR_035179    | 330578    |
| -0,451 | -0,379 | -0,570 | -0,454 | -0,424 | -0,463 | NM_016801    | 20907     |
| -0,445 | -0,060 | 0,119  | -1,001 | -1,325 | -0,816 |              |           |
| 0,537  | 0,104  | -0,138 | 0,188  | -1,731 | 0,237  | NM_007425    | 11596     |
| 0,145  | -2,216 | -1,809 | -0,772 | -1,372 | -1,015 | NM_011374    | 20449     |
| 0,053  | -0,501 | -0,500 | -0,169 | -0,996 | -0,575 | NM_172443    | 207592    |
| 1,340  | 0,644  | 0,857  | 1,295  | 1,449  | 0,856  |              | 74750     |
| 2,397  | 0,762  | 0,568  | 0,876  | 1,142  | 0,327  | NM_007992    | 14115     |
| -0,685 | 0,120  | -0,685 | -0,526 | -0,681 | -0,697 |              |           |
| -0,854 | -1,313 | -1,113 | -1,069 | -0,774 | -0,934 | NM_178638    | 81907     |
| 0,351  | -0,267 | -0,563 | -0,428 | -0,601 | -0,214 | NM_178892    | 99929     |
| -0,180 | 0,104  | -0,436 | -0,307 | -1,004 | -1,052 | NM_025451    | 66259     |
| 0,019  | 0,071  | 0,033  | -0,077 | 0,038  | -0,042 | NM_176933    | 319520    |
| -0,598 | -0,617 | -0,228 | -0,008 | 0,237  | 0,185  |              |           |
| 0,365  | 0,043  | 0,053  | -0,011 | 0,046  | 0,005  | NM_022980    | 53902     |
| 0,847  | -0,673 | -0,638 | -0,178 | -0,511 | 0,460  |              |           |
| 2,168  | 0,443  | 0,712  | 1,196  | 0,393  | -0,166 | NR_045506    | 71056     |
| 1,193  | 0,389  | 0,219  | 0,584  | 0,069  | 0,032  |              |           |
| 0,261  | 0,555  | 0,822  | 0,636  | 1,370  | 1,011  | NM_173419    | 239133    |
| 0,495  | 0,195  | -0,030 | -0,083 | -0,195 | -0,376 | NM_207687    | 56226     |
| 0,499  | 0,182  | 0,047  | 0,181  | 0,266  | 0,062  | NM_008967    | 19222     |
| -0,146 | -0,383 | -0,912 | -0,730 | -2,071 | -1,108 | NM_009926    | 12815     |
| -1,939 | -2,159 | -1,933 | -2,449 | -2,802 | -1,836 | NM_001080934 | 217316    |

|        |        |        |        |        |        |              |        |
|--------|--------|--------|--------|--------|--------|--------------|--------|
| 0,048  | -0,389 | -0,503 | -0,161 | -0,269 | -0,455 | XM_003086262 |        |
| -0,883 | -0,800 | 0,026  | -0,221 | -0,749 | 0,248  | NM_029139    | 668110 |
| -1,299 | -1,373 | -1,192 | -1,018 | -1,210 | -1,456 |              |        |
| 1,054  | 0,279  | 0,066  | 0,368  | 0,013  | 0,003  | NM_011444    | 20678  |
| 0,975  | 0,266  | 0,024  | 0,359  | 0,018  | -0,018 |              |        |
| -0,152 | -0,142 | -0,151 | -0,151 | -0,134 | -0,156 | NM_027001    | 69239  |
| 1,565  | 0,457  | 0,099  | 0,697  | 0,091  | 0,202  |              |        |
| -0,082 | 0,201  | 0,031  | -0,075 | 0,287  | -0,011 | NM_001008700 | 16190  |
| -0,659 | -0,186 | 0,041  | 0,206  | -1,188 | 0,193  | NM_027909    | 71764  |
| 0,716  | -0,466 | -0,766 | 0,227  | -0,323 | -0,492 | NR_001460    | 19782  |
| 0,948  | 0,381  | 0,049  | 0,351  | 0,028  | -0,052 |              |        |
| 1,000  | 0,316  | 0,031  | 0,349  | 0,022  | -0,022 |              |        |
| -0,101 | 1,303  | 1,259  | 0,101  | 0,379  | 1,048  | NM_010371    | 14940  |
| 0,044  | -0,392 | -0,333 | -0,181 | -0,235 | -0,225 |              |        |
| 0,082  | -0,066 | -0,577 | -0,334 | -1,203 | -0,950 | NM_001142732 | 101100 |
| 1,582  | 0,475  | 0,069  | 0,539  | 0,000  | 0,045  |              |        |
| -0,466 | 0,424  | -0,092 | -0,878 | 0,053  | -0,291 | NM_172631    | 52662  |
| 0,007  | -1,484 | -1,484 | -1,506 | -1,480 | -1,489 |              | 18197  |
| 1,743  | 0,425  | 0,482  | 0,840  | 0,410  | 0,069  |              |        |
| 0,994  | 0,563  | 0,103  | 0,407  | -0,047 | 0,047  |              |        |
| 0,132  | -0,162 | -0,018 | -0,243 | 0,231  | -0,278 | NM_010287    | 14608  |
| 0,357  | 0,490  | 0,227  | 0,045  | 0,456  | -0,078 | NM_001039244 | 633640 |
| 0,425  | 0,151  | 0,063  | 0,015  | -0,093 | -0,575 |              |        |
| 0,217  | -0,414 | 0,869  | 0,129  | -0,055 | 1,115  |              |        |
| -0,783 | 0,074  | -0,762 | -0,709 | 0,009  | -0,754 |              |        |
| -0,364 | -0,432 | -0,386 | -0,404 | -0,429 | -0,403 |              |        |
| 0,787  | 0,426  | 0,027  | 0,625  | 0,279  | 0,472  | NM_001033170 | 73813  |
| -0,906 | -0,920 | -0,898 | -0,916 | -0,675 | 0,831  |              |        |
| -1,041 | -2,350 | -2,105 | -1,479 | -1,386 | -1,398 | NM_145838    | 241230 |
| 0,015  | -1,063 | -0,015 | -0,034 | -0,954 | -0,343 |              |        |
| -1,890 | -1,886 | -1,880 | -1,897 | -1,878 | -1,869 | NM_010259    | 14468  |
| 1,315  | 0,217  | -0,078 | 0,166  | 0,068  | -0,005 |              |        |
| -0,956 | -1,479 | -1,644 | -1,405 | -1,296 | -1,112 | NM_007409    | 11522  |
| -0,471 | -1,023 | -0,229 | -0,079 | -0,819 | -0,101 |              |        |
| 0,996  | 0,383  | -0,026 | 0,330  | 0,026  | 0,076  | NM_177354    | 238328 |
| 0,093  | -0,184 | 0,115  | -0,117 | -0,156 | -0,257 |              |        |
| -1,645 | -0,185 | -0,061 | -0,903 | -0,319 | -0,169 | NM_080595    | 140703 |
| -0,289 | -0,290 | -0,284 | -0,296 | -0,530 | -0,629 | NM_175751    | 269023 |
| -1,034 | 0,149  | -0,308 | -0,890 | -0,961 | -0,576 | NM_001081069 | 50782  |
| 1,197  | -0,306 | 0,013  | 0,063  | -0,338 | -0,160 | NM_007561    | 12168  |
| -1,060 | -1,610 | -0,856 | -0,784 | -0,246 | -0,510 | NM_183024    | 242570 |
| -0,414 | -0,468 | -0,768 | -0,550 | -0,178 | -0,710 |              |        |
| -0,982 | -0,479 | -0,638 | -1,124 | -0,899 | -0,792 | NM_144926    | 233878 |
| -0,007 | -0,651 | -1,475 | -0,981 | -0,477 | -0,590 | NM_009800    | 12348  |
| -1,638 | -1,633 | -0,578 | -1,068 | -1,270 | -0,369 |              |        |
| 0,911  | -0,317 | -0,277 | 0,348  | -0,610 | -0,017 |              |        |
| -0,088 | -0,224 | -0,378 | -0,173 | -0,418 | -0,241 | NM_011578    | 21814  |
| -0,416 | -0,005 | 0,388  | -0,407 | -0,434 | -0,225 | NM_145420    | 216080 |
| -0,390 | -1,220 | -1,453 | -2,029 | -2,030 | -2,575 |              |        |
| -0,485 | -0,849 | -0,850 | -1,020 | -0,288 | -0,857 | NM_001197321 | 108655 |
| -0,008 | -2,509 | -1,274 | -1,087 | -1,007 | -0,290 |              |        |
| -2,070 | -0,818 | -1,557 | -1,899 | -1,252 | -2,088 |              |        |
| -1,004 | -0,450 | -0,752 | -0,624 | -0,994 | -0,065 | NM_001012322 | 319229 |
| 0,144  | -0,354 | -0,208 | -0,368 | -0,275 | -0,669 | NM_016851    | 54139  |
| -0,467 | -0,404 | -0,006 | -0,751 | -0,504 | -0,756 | NR_027784    | 104103 |
| -1,665 | -1,930 | -1,665 | -1,656 | -1,911 | -1,673 |              |        |



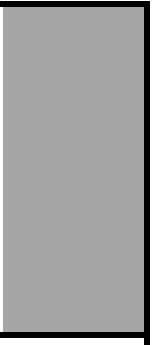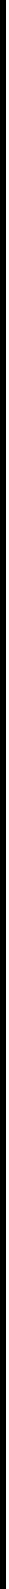

\_\_\_\_\_

\_\_\_\_\_

\_\_\_\_\_

| SeqID   | ProbeID       | GeneName       | Description                                                                              |
|---------|---------------|----------------|------------------------------------------------------------------------------------------|
| 2271329 | A_55_P2031466 | Lrrc32         | Mus musculus leucine rich repeat containing 32                                           |
| 2307570 | A_55_P2181222 | E430029J22Rik  | Mus musculus pyrin domain containing 3 (Pycardin)                                        |
| 2271288 | A_55_P1985422 | LOC100044227   | Q811B0_MOUSE (Q811B0) Erythroid differentiation                                          |
| 2292890 | A_55_P2034481 | Erdr1          | Mus musculus erythroid differentiation regulator 1                                       |
| 2290610 | A_51_P349213  | Fcrl1          | Mus musculus Fc receptor-like 1 (Fcrl1), transmembrane                                   |
| 2295189 | A_52_P227267  | Atp1a2         | Mus musculus ATPase, Na <sup>+</sup> /K <sup>+</sup> transporting, alpha 2               |
| 2286413 | A_66_P128761  | E430029J22Rik  | Mus musculus pyrin domain containing 3 (Pycardin)                                        |
| 2264815 | A_55_P2062133 | Etv3           | Mus musculus ets variant gene 3 (Etv3), transcription factor                             |
| 2293489 | A_51_P205779  | Cd5l           | Mus musculus CD5 antigen-like (Cd5l), mRNA                                               |
| 2280606 | A_30_P0103165 | A_30_P01031657 | lincRNA:chr3:84609788-84618062 reverse strand                                            |
| 2305426 | A_52_P203316  | Kcnf1          | Mus musculus potassium voltage-gated channel non-inactivating                            |
| 2290624 | A_66_P103957  | Bbs7           | Mus musculus Bardet-Biedl syndrome 7 (human ortholog)                                    |
| 2307607 | A_55_P2116536 | Kcnf1          | Mus musculus potassium voltage-gated channel non-inactivating                            |
| 2311579 | A_30_P0102377 | A_30_P01023778 | lincRNA:chr3:48896525-48994125 forward strand                                            |
| 2261466 | A_30_P0102202 | A_30_P01022023 | lincRNA:chr5:111602486-111603075 forward strand                                          |
| 2268697 | A_66_P121480  | Sardh          | Mus musculus sarcosine dehydrogenase (Sardh), cytosolic                                  |
| 2290566 | A_30_P0102826 | A_30_P01028268 | lincRNA:chr3:37568488-37568964 forward strand                                            |
| 2305499 | A_30_P0102856 | A_30_P01028564 | lincRNA:chr10:98718526-98719169 reverse strand                                           |
| 2309983 | A_55_P2183914 | Gm7120         | Mus musculus predicted gene 7120 (Gm7120)                                                |
| 2310432 | A_55_P2015715 | Rab4a          | Mus musculus RAB4A, member RAS oncogene family                                           |
| 2278852 | A_51_P335702  | Tmem114        | Mus musculus transmembrane protein 114 (Tmem114), mRNA                                   |
| 2273936 | A_55_P2022971 | Tspan9         | Mus musculus tetraspanin 9 (Tspan9), mRNA                                                |
| 2276525 | A_55_P1953341 | Wfdc2          | Mus musculus WAP four-disulfide core domain containing 2                                 |
| 2306301 | A_55_P2148641 | Rab4a          | Mus musculus RAB4A, member RAS oncogene family                                           |
| 2288123 | A_55_P2038422 | Adamts17       | Mus musculus a disintegrin-like and metalloprotease with thrombospondin type 1 motifs 17 |
| 2296517 | A_55_P1985693 | Fhdc1          | Mus musculus FH2 domain containing 1 (Fhdc1), mRNA                                       |
| 2283507 | A_55_P2269289 | Dgkg           | Mus musculus diacylglycerol kinase, gamma (Dgkg), cytosolic                              |
| 2284098 | A_55_P2152956 | Plekhm3        | Mus musculus pleckstrin homology domain containing 3                                     |
| 2265884 | A_30_P0103276 | A_30_P01032768 | lincRNA:chr11:99048975-99062425 reverse strand                                           |
| 2273566 | A_30_P0102598 | A_30_P01025989 | lincRNA:chr3:84609788-84618062 reverse strand                                            |
| 2291814 | A_55_P2065651 | Trav17         | Mus musculus 16 days neonate thymus cDNA                                                 |
| 2310774 | A_55_P2107775 | Apol9a         | Mus musculus apolipoprotein L 9a (Apol9a), transcript variant 1                          |
| 2305960 | A_55_P2014100 | Gm7120         | Mus musculus predicted gene 7120 (Gm7120)                                                |
| 2295472 | A_30_P0103357 | A_30_P01033579 | lincRNA:chr1:138473514-138476054 reverse strand                                          |
| 2301160 | A_30_P0103273 | A_30_P01032731 | lincRNA:chr16:64796849-64843249 reverse strand                                           |
| 2303029 | A_55_P2120866 | LOC100044171   | PREDICTED: Mus musculus hypothetical LOC100044171                                        |
| 2306577 | A_66_P110633  | Apol9b         | Mus musculus apolipoprotein L 9b (Apol9b), transcript variant 2                          |
| 2305000 | A_52_P124734  | Cybrd1         | Mus musculus cytochrome b reductase 1 (Cybrd1), cytosolic                                |
| 2283521 | A_52_P481279  | Gm1060         | Mus musculus coiled-coil domain containing 1060                                          |
| 2264156 | A_55_P2344244 | 4930556H04Rik  | Mus musculus adult male testis cDNA, RIKEN                                               |
| 2286467 | A_55_P2056192 | NAP111293-1    | Unknown                                                                                  |
| 2259768 | A_55_P2024634 | Gm13546        | predicted gene 13546 [Source:MGI Symbol;Accession:Gm13546]                               |
| 2281640 | A_30_P0102038 | A_30_P01020388 | lincRNA:chrX:47890565-47915775 forward strand                                            |
| 2286414 | A_30_P0102552 | A_30_P01025525 | lincRNA:chr3:37659958-37665945 forward strand                                            |
| 2290597 | A_55_P2082786 | Trib2          | Mus musculus tribbles homolog 2 (Drosophila ortholog)                                    |
| 2279988 | A_30_P0101903 | A_30_P01019033 | lincRNA:chr5:111602486-111603075 forward strand                                          |

|         |               |                |                                                  |
|---------|---------------|----------------|--------------------------------------------------|
| 2306135 | A_30_P0102123 | A_30_P01021230 | lincRNA:chr3:37659958-37665945 forward st        |
| 2282750 | A_66_P114705  | Adamts6        | Mus musculus a disintegrin-like and metallope    |
| 2269394 | A_51_P424471  | Cnih3          | Mus musculus cornichon homolog 3 (Drosoph        |
| 2264259 | A_55_P2001233 | E430029J22Rik  | Mus musculus pyrin domain containing 3 (Pyc      |
| 2280238 | A_30_P0102690 | A_30_P01026900 | lincRNA:chr12:12916233-12919835 forward s        |
| 2300864 | A_30_P0101804 | A_30_P01018048 | lincRNA:chr3:37659958-37665945 forward st        |
| 2296830 | A_55_P2036627 | E430029J22Rik  | Mus musculus pyrin domain containing 3 (Pyc      |
| 2290163 | A_55_P1967538 | Hunk           | Mus musculus hormonally upregulated Neu-as       |
| 2263575 | A_55_P2043367 | Apol9a         | Mus musculus apolipoprotein L 9a (Apol9a), t     |
| 2265173 | A_30_P0101803 | A_30_P01018036 | lincRNA:chr14:73746324-73749119 reverse s        |
| 2261431 | A_30_P0101918 | A_30_P01019182 | lincRNA:chr1:138473514-138476054 reverse         |
| 2311496 | A_52_P385594  | Tal2           | Mus musculus T-cell acute lymphocytic leukem     |
| 2297589 | A_55_P1954393 | Susd4          | Mus musculus sushi domain containing 4 (Sus      |
| 2295316 | A_30_P0102390 | A_30_P01023909 | lincRNA:chr15:92174226-92201201 forward s        |
| 2307188 | A_51_P399845  | Fgf2           | Mus musculus fibroblast growth factor 2 (Fgf2    |
| 2305092 | A_66_P121583  | Gm7120         | Mus musculus predicted gene 7120 (Gm7120         |
| 2299510 | A_55_P2032815 | Rnase13        | Mus musculus ribonuclease, RNase A family,       |
| 2304970 | A_30_P0103291 | A_30_P01032917 | lincRNA:chr12:15735906-15798506 reverse s        |
| 2310555 | A_30_P0102844 | A_30_P01028440 | lincRNA:chr10:96096995-96097589 forward s        |
| 2296265 | A_55_P2009225 | Cd34           | Mus musculus CD34 antigen (Cd34), transcrip      |
| 2284245 | A_55_P1989738 | 4930426L09Rik  | Mus musculus RIKEN cDNA 4930426L09 ger           |
| 2280302 | A_51_P263290  | Galnt9         | Mus musculus UDP-N-acetyl-alpha-D-galactos       |
| 2297550 | A_55_P2044582 | Igln5          | Mus musculus IgLON family member 5 (Igln5        |
| 2298259 | A_55_P2012439 | Tnfrsf19       | Mus musculus tumor necrosis factor receptor s    |
| 2293972 | A_30_P0101868 | A_30_P01018688 | lincRNA:chr5:111538420-111540142 forward         |
| 2266129 | A_55_P2012824 | Gm9426         | Unknown                                          |
| 2298772 | A_30_P0102188 | A_30_P01021888 | lincRNA:chr3:19179899-19216399 reverse st        |
| 2270548 | A_52_P108850  | St8sia1        | Mus musculus ST8 alpha-N-acetyl-neuraminid       |
| 2275787 | A_65_P08768   | Fbln1          | fibulin 1 [Source:MGI Symbol;Acc:MGI:95487       |
| 2282633 | A_55_P2017207 | A430078G23Rik  | Mus musculus RIKEN cDNA A430078G23 ge            |
| 2282004 | A_30_P0101908 | A_30_P01019082 | lincRNA:chr1:33893475-33903900 forward st        |
| 2294545 | A_30_P0102937 | A_30_P01029370 | lincRNA:chr11:95627874-95640824 forward s        |
| 2265157 | A_52_P590535  | Fbln2          | Mus musculus fibulin 2 (Fbln2), transcript varia |
| 2298126 | A_55_P2074736 | Prkar1b        | Mus musculus protein kinase, cAMP depende        |
| 2277509 | A_30_P0102232 | A_30_P01022326 | lincRNA:chr4:114631940-114632618 reverse         |
| 2260687 | A_30_P0103064 | A_30_P01030644 | lincRNA:chrX:135880775-135891525 reverse         |
| 2258834 | A_30_P0103194 | A_30_P01031947 | lincRNA:chr3:84609788-84618062 reverse st        |
| 2267983 | A_55_P2105452 | Foxp1          | Mus musculus forkhead box P1 (Foxp1), trans      |
| 2292501 | A_30_P0102555 | A_30_P01025555 | lincRNA:chr1:138473514-138476054 reverse         |
| 2279076 | A_55_P2016792 | Inpp4b         | Mus musculus inositol polyphosphate-4-phosp      |
| 2262540 | A_55_P2170034 | Rgl1           | Mus musculus ral guanine nucleotide dissocia     |
| 2300201 | A_30_P0102902 | A_30_P01029025 | lincRNA:chr2:164739589-164745000 forward         |
| 2303699 | A_51_P112223  | Gsta4          | Mus musculus glutathione S-transferase, alph     |
| 2299879 | A_66_P135471  | Gm4759         | Mus musculus predicted gene 4759 (Gm4759         |
| 2295753 | A_66_P105075  | Mmp11          | Mus musculus matrix metalloproteinase 11 (Mn     |
| 2264648 | A_30_P0101906 | A_30_P01019065 | lincRNA:chr17:12965849-12968519 forward s        |
| 2262051 | A_55_P2316041 | BC050972       | cDNA sequence BC050972 [Source:MGI Sym           |
| 2266603 | A_30_P0101793 | A_30_P01017933 | lincRNA:chr12:15735906-15798506 reverse s        |
| 2303879 | A_55_P1989698 | Mmp11          | Mus musculus matrix metalloproteinase 11 (Mn     |
| 2297691 | A_55_P2162122 | Gm8721         | predicted gene 8721 [Source:MGI Symbol;Ac        |
| 2268867 | A_55_P2184023 | Dnahc7a        | Mus musculus adult male hypothalamus cDNA        |
| 2297276 | A_52_P491554  | Zfp759         | Mus musculus zinc finger protein 759 (Zfp759     |
| 2259461 | A_55_P1993168 | Ppargc1b       | Mus musculus peroxisome proliferative activat    |

| ANOVA p-value | Adjusted ANOVA p-value | Tukey p-value | Fold change | Log2 ratio | Median | wt_non-stim_1 | wt_non-stim_2 | wt_non-stim_3 |
|---------------|------------------------|---------------|-------------|------------|--------|---------------|---------------|---------------|
| 1,26E-19      | 4,38E-16               | 2,28E-14      | -230,241    | -7,847     | 10,425 | 4,432         | 4,248         | 4,223         |
| 2,63E-16      | 6,03E-14               | 1,56E-11      | -41,184     | -5,364     | 9,146  | 4,039         | 3,987         | 4,053         |
| 4,28E-04      | 1,39E-03               | 7,87E-03      | -32,492     | -5,022     | 13,324 | 0,193         | -0,022        | 1,055         |
| 4,09E-04      | 1,34E-03               | 7,27E-03      | -24,847     | -4,635     | 13,815 | 0,315         | -0,030        | 1,024         |
| 1,48E-17      | 8,83E-15               | 2,29E-14      | -16,201     | -4,018     | 3,846  | 1,876         | 1,563         | 1,550         |
| 5,41E-08      | 3,68E-07               | 3,85E-07      | -7,220      | -2,852     | 3,016  | 1,533         | 0,196         | 0,764         |
| 8,36E-17      | 2,89E-14               | 6,59E-10      | -7,091      | -2,826     | 6,113  | 3,829         | 3,835         | 3,883         |
| 3,93E-16      | 7,93E-14               | 7,23E-14      | -6,835      | -2,773     | 9,485  | 1,584         | 1,704         | 1,810         |
| 5,21E-04      | 1,67E-03               | 6,11E-04      | -6,285      | -2,652     | 5,157  | -0,770        | -0,133        | -2,379        |
| 5,27E-05      | 2,02E-04               | 2,98E-04      | -5,633      | -2,494     | 3,430  | 0,151         | 0,160         | 0,786         |
| 5,59E-06      | 2,55E-05               | 1,21E-04      | -5,483      | -2,455     | 2,039  | 0,459         | -0,084        | -0,077        |
| 7,46E-04      | 2,33E-03               | 7,80E-03      | -5,267      | -2,397     | 2,873  | -0,917        | -0,389        | -0,333        |
| 6,81E-05      | 2,55E-04               | 9,80E-04      | -5,260      | -2,395     | 3,499  | 0,397         | -0,536        | -0,003        |
| 6,46E-03      | 1,69E-02               | 1,11E-02      | -4,231      | -2,081     | 2,988  | -0,967        | 0,070         | 0,407         |
| 7,06E-08      | 4,69E-07               | 8,37E-05      | -4,179      | -2,063     | 4,519  | 0,808         | 0,669         | 0,589         |
| 2,01E-09      | 1,94E-08               | 7,18E-07      | -3,874      | -1,954     | 6,039  | 1,145         | 1,349         | 1,207         |
| 2,89E-04      | 9,71E-04               | 6,79E-03      | -3,837      | -1,940     | 2,488  | -0,468        | -0,175        | 0,942         |
| 8,84E-03      | 2,26E-02               | 1,78E-02      | -3,660      | -1,872     | 3,431  | 0,192         | 0,525         | 0,167         |
| 1,52E-06      | 7,70E-06               | 9,25E-03      | -3,593      | -1,845     | 5,676  | 0,025         | 0,155         | 0,232         |
| 1,95E-13      | 8,11E-12               | 1,11E-10      | -3,399      | -1,765     | 10,496 | 1,004         | 0,972         | 0,982         |
| 1,97E-02      | 4,67E-02               | 2,06E-02      | -3,387      | -1,760     | 3,538  | -1,486        | 0,922         | 1,263         |
| 7,50E-08      | 4,96E-07               | 1,78E-05      | -3,329      | -1,735     | 4,084  | 0,228         | 0,487         | 0,607         |
| 9,68E-14      | 4,65E-12               | 2,34E-06      | -3,272      | -1,710     | 4,732  | 2,696         | 2,732         | 2,887         |
| 1,80E-10      | 2,37E-09               | 1,41E-08      | -3,178      | -1,668     | 7,905  | 0,885         | 0,667         | 0,788         |
| 1,16E-04      | 4,17E-04               | 5,07E-05      | -3,057      | -1,612     | 3,548  | 0,691         | -0,028        | 0,652         |
| 1,11E-05      | 4,78E-05               | 1,12E-02      | -3,029      | -1,599     | 6,625  | 0,647         | 0,599         | 0,189         |
| 3,32E-03      | 9,22E-03               | 4,00E-03      | -2,998      | -1,584     | 4,698  | 0,331         | -0,063        | 0,063         |
| 2,63E-11      | 4,56E-10               | 4,11E-10      | -2,942      | -1,557     | 6,368  | 0,420         | 0,520         | 0,615         |
| 1,30E-10      | 1,79E-09               | 3,30E-04      | -2,878      | -1,525     | 4,533  | 2,113         | 1,656         | 1,565         |
| 8,36E-06      | 3,68E-05               | 5,85E-04      | -2,872      | -1,522     | 4,015  | 0,340         | 0,343         | -0,219        |
| 6,80E-03      | 1,78E-02               | 8,42E-03      | -2,854      | -1,513     | 2,762  | -0,147        | -0,242        | 0,367         |
| 1,84E-11      | 3,36E-10               | 2,17E-07      | -2,840      | -1,506     | 6,844  | 1,812         | 2,027         | 1,884         |
| 4,11E-05      | 1,60E-04               | 2,40E-03      | -2,825      | -1,498     | 4,882  | -0,009        | 0,013         | 0,787         |
| 1,25E-06      | 6,44E-06               | 7,82E-06      | -2,815      | -1,493     | 5,508  | 0,467         | 0,336         | 0,351         |
| 1,43E-04      | 5,06E-04               | 3,81E-02      | -2,778      | -1,474     | 4,585  | 1,001         | 0,860         | 0,673         |
| 1,75E-08      | 1,33E-07               | 1,46E-04      | -2,774      | -1,472     | 6,496  | 0,013         | 0,001         | 0,310         |
| 1,19E-11      | 2,32E-10               | 1,03E-06      | -2,734      | -1,451     | 9,841  | 2,002         | 2,060         | 2,088         |
| 6,61E-05      | 2,48E-04               | 2,65E-04      | -2,676      | -1,420     | 4,578  | 0,557         | 0,019         | 0,434         |
| 1,74E-14      | 1,27E-12               | 6,71E-07      | -2,641      | -1,401     | 8,074  | 2,634         | 2,887         | 2,792         |
| 7,39E-07      | 3,97E-06               | 1,83E-05      | -2,606      | -1,382     | 5,567  | 0,408         | 0,661         | 0,486         |
| 1,46E-10      | 1,98E-09               | 1,76E-07      | -2,594      | -1,375     | 7,163  | 0,475         | 0,705         | 0,782         |
| 3,78E-07      | 2,16E-06               | 4,73E-05      | -2,583      | -1,369     | 4,748  | 0,311         | 0,390         | 0,774         |
| 3,51E-03      | 9,70E-03               | 4,43E-02      | -2,579      | -1,367     | 4,947  | 0,262         | -0,087        | 0,087         |
| 1,39E-07      | 8,68E-07               | 2,73E-04      | -2,565      | -1,359     | 3,768  | 0,072         | -0,483        |               |
| 1,32E-08      | 1,04E-07               | 1,13E-02      | -2,535      | -1,342     | 5,900  | 1,398         | 1,452         | 1,347         |
| 5,11E-07      | 2,84E-06               | 9,53E-03      | -2,519      | -1,333     | 5,119  | 0,994         | 0,964         | 0,961         |

|          |          |          |        |        |       |        |        |        |
|----------|----------|----------|--------|--------|-------|--------|--------|--------|
| 1,62E-08 | 1,24E-07 | 1,64E-02 | -2,512 | -1,329 | 5,013 | 0,072  | -0,265 | -0,566 |
| 5,33E-05 | 2,04E-04 | 2,23E-03 | -2,464 | -1,301 | 6,937 | 0,598  | 0,860  | 0,971  |
| 2,11E-18 | 2,27E-15 | 1,54E-07 | -2,420 | -1,275 | 4,010 | -2,135 | -2,153 | -2,157 |
| 7,51E-16 | 1,24E-13 | 6,66E-05 | -2,415 | -1,272 | 9,641 | 3,474  | 3,498  | 3,579  |
| 2,73E-05 | 1,10E-04 | 5,82E-03 | -2,392 | -1,258 | 4,832 | 0,611  | 0,870  | 0,624  |
| 2,96E-12 | 7,36E-11 | 1,47E-07 | -2,377 | -1,249 | 5,990 | -0,179 | -0,124 | -0,031 |
| 3,73E-16 | 7,64E-14 | 1,29E-05 | -2,372 | -1,246 | 7,821 | 2,841  | 3,189  | 2,974  |
| 3,86E-06 | 1,81E-05 | 8,89E-03 | -2,362 | -1,240 | 2,417 | -0,374 | -0,393 | -0,387 |
| 1,19E-11 | 2,32E-10 | 1,91E-06 | -2,357 | -1,237 | 9,361 | 2,081  | 2,086  | 2,083  |
| 7,72E-09 | 6,42E-08 | 4,96E-02 | -2,341 | -1,227 | 5,322 | 2,054  | 2,381  | 1,921  |
| 4,26E-03 | 1,16E-02 | 1,55E-02 | -2,336 | -1,224 | 4,462 | 0,299  | 0,114  | 0,446  |
| 9,53E-08 | 6,17E-07 | 2,72E-02 | -2,304 | -1,204 | 3,064 | -0,918 | -0,931 | -0,913 |
| 2,03E-09 | 1,96E-08 | 1,42E-04 | -2,301 | -1,202 | 7,896 | 1,018  | 0,963  | 1,113  |
| 7,89E-03 | 2,04E-02 | 3,99E-02 | -2,289 | -1,195 | 3,763 | 1,440  | -0,151 | 0,366  |
| 3,36E-12 | 8,13E-11 | 3,93E-04 | -2,283 | -1,191 | 3,816 | -1,069 | -1,408 | -1,702 |
| 1,78E-06 | 8,88E-06 | 5,72E-03 | -2,282 | -1,190 | 6,953 | -0,045 | -0,047 | 0,332  |
| 3,17E-03 | 8,83E-03 | 6,75E-03 | -2,277 | -1,187 | 3,296 | -0,183 | 1,178  | 0,045  |
| 1,52E-09 | 1,52E-08 | 5,56E-03 | -2,277 | -1,187 | 6,275 | 1,079  | 1,215  | 1,440  |
| 1,55E-10 | 2,08E-09 | 2,94E-03 | -2,250 | -1,170 | 7,292 | 2,143  | 2,320  | 1,996  |
| 6,18E-03 | 1,63E-02 | 3,60E-02 | -2,249 | -1,169 | 4,304 | 0,282  | 0,863  | 0,467  |
| 6,10E-04 | 1,94E-03 | 1,52E-03 | -2,247 | -1,168 | 5,491 | 0,131  | 0,611  | 0,352  |
| 5,33E-08 | 3,63E-07 | 6,68E-05 | -2,238 | -1,162 | 6,730 | 0,632  | 1,016  | 0,559  |
| 3,55E-05 | 1,40E-04 | 2,02E-02 | -2,208 | -1,143 | 4,840 | 1,659  | 1,691  | 1,440  |
| 3,74E-07 | 2,14E-06 | 3,06E-02 | -2,207 | -1,142 | 4,073 | 0,022  | -1,756 | -0,750 |
| 5,38E-04 | 1,72E-03 | 3,67E-02 | -2,181 | -1,125 | 4,827 | 0,285  | 0,591  | 0,599  |
| 2,48E-03 | 7,04E-03 | 8,32E-03 | -2,178 | -1,123 | 4,541 | -0,011 | -0,068 | -0,050 |
| 1,45E-06 | 7,37E-06 | 5,28E-04 | -2,155 | -1,108 | 4,421 | 0,102  | 0,817  | 0,339  |
| 7,76E-09 | 6,45E-08 | 8,14E-04 | -2,154 | -1,107 | 7,973 | 1,653  | 1,627  | 1,676  |
| 7,26E-08 | 4,81E-07 | 4,57E-04 | -2,149 | -1,104 | 5,917 | 0,006  | -0,146 | 0,241  |
| 1,96E-11 | 3,54E-10 | 3,85E-03 | -2,148 | -1,103 | 5,806 | 1,898  | 1,968  | 1,865  |
| 2,13E-03 | 6,11E-03 | 3,70E-02 | -2,142 | -1,099 | 3,449 | -0,045 | 0,149  | -0,665 |
| 3,66E-07 | 2,10E-06 | 2,18E-03 | -2,136 | -1,095 | 4,320 | 0,898  | 0,484  | 0,450  |
| 6,78E-09 | 5,71E-08 | 2,03E-02 | -2,132 | -1,092 | 5,932 | -1,532 | -0,956 | -0,327 |
| 5,19E-06 | 2,38E-05 | 4,86E-04 | -2,105 | -1,074 | 7,097 | 1,176  | 0,993  | 0,986  |
| 3,89E-03 | 1,06E-02 | 2,76E-02 | -2,104 | -1,073 | 3,045 | -1,035 | 0,220  | -0,089 |
| 3,24E-03 | 9,00E-03 | 1,65E-03 | -2,101 | -1,071 | 3,412 | -0,852 | -0,078 | 0,405  |
| 6,24E-04 | 1,98E-03 | 1,16E-02 | -2,098 | -1,069 | 3,560 | 0,114  | -0,114 | 0,444  |
| 9,89E-06 | 4,30E-05 | 1,96E-03 | -2,092 | -1,065 | 8,692 | 0,901  | 0,704  | 0,738  |
| 4,21E-06 | 1,96E-05 | 2,85E-05 | -2,092 | -1,065 | 6,137 | 0,520  | 0,123  | 0,109  |
| 1,25E-03 | 3,75E-03 | 3,14E-03 | -2,086 | -1,061 | 5,411 | -0,093 | 0,271  | 0,914  |
| 9,55E-07 | 5,03E-06 | 4,08E-04 | -2,082 | -1,058 | 5,040 | -0,620 | -0,838 | -0,893 |
| 5,35E-11 | 8,35E-10 | 6,38E-03 | -2,053 | -1,038 | 4,807 | 1,905  | 1,735  | 1,546  |
| 4,04E-13 | 1,46E-11 | 1,47E-05 | -2,043 | -1,031 | 6,881 | 1,619  | 1,474  | 1,692  |
| 2,82E-11 | 4,85E-10 | 1,76E-02 | -2,038 | -1,027 | 5,744 | 1,665  | 1,170  | 1,323  |
| 8,84E-10 | 9,45E-09 | 1,32E-04 | -2,036 | -1,026 | 5,941 | 1,881  | 1,358  | 1,877  |
| 1,91E-03 | 5,54E-03 | 1,01E-02 | -2,029 | -1,021 | 4,386 | 0,573  | 0,026  | 0,556  |
| 2,79E-06 | 1,34E-05 | 1,65E-03 | -2,027 | -1,019 | 1,774 | 0,000  | -0,001 | -0,003 |
| 1,52E-10 | 2,05E-09 | 2,79E-03 | -2,027 | -1,019 | 6,835 | 1,318  | 1,471  | 1,368  |
| 2,47E-08 | 1,81E-07 | 1,35E-03 | -2,025 | -1,018 | 7,365 | 1,622  | 1,331  | 1,780  |
| 7,02E-03 | 1,83E-02 | 2,63E-02 | -2,022 | -1,016 | 4,381 | 0,062  | -0,018 | 0,834  |
| 8,55E-04 | 2,64E-03 | 8,74E-03 | -2,021 | -1,015 | 3,690 | 0,489  | 0,045  | 0,891  |
| 1,15E-06 | 5,97E-06 | 1,09E-02 | -2,017 | -1,012 | 3,052 | -1,055 | -1,066 | -1,053 |
| 6,65E-03 | 1,74E-02 | 7,60E-03 | -2,010 | -1,007 | 4,264 | 0,274  | 0,454  | -0,040 |



| wt_non-stim_4 | wt_non-stim_21 | CD4creGARPII-fl_non-stim_22 | CD4creGARPII-fl_non-stim_23 | CD4creGARPII-fl_non-stim_8 | CD4creGARPII-fl_non-stim_9 | CD4creGARPII-fl_non-stim_10 | wt_stim_11 | wt_stim_12 | wt_stim_13 |
|---------------|----------------|-----------------------------|-----------------------------|----------------------------|----------------------------|-----------------------------|------------|------------|------------|
| 4,092         | 4,351          | -6,339                      | -6,465                      | -6,413                     | -6,052                     | -7,275                      | 4,042      | 3,853      | 4,000      |
| 4,158         | 3,919          | 1,090                       | 1,955                       | 2,197                      | 2,176                      | 1,665                       | -1,142     | -1,266     | -1,090     |
| 0,844         | 0,308          | -4,485                      | -5,691                      | 0,022                      | -4,958                     | -6,331                      | 0,064      | -0,054     | 0,931      |
| 0,832         | 0,409          | -3,932                      | -5,281                      | 0,030                      | -4,312                     | -5,653                      | 0,081      | -0,155     | 0,926      |
| 1,784         | 1,972          | -1,923                      | -1,935                      | -1,907                     | -1,892                     | -1,550                      | 1,874      | 2,156      | 1,935      |
| 0,638         | 1,085          | -0,853                      | -1,026                      | -1,213                     | -0,271                     | -0,849                      | 1,860      | 1,492      | 1,660      |
| 3,789         | 3,532          | 0,765                       | 1,485                       | 1,691                      | 1,654                      | 1,357                       | -1,443     | -1,490     | -1,256     |
| 1,794         | 1,430          | -1,335                      | -0,987                      | -1,259                     | -0,897                     | -1,426                      | 1,137      | 1,210      | 1,141      |
| 0,029         | 1,399          | -0,271                      | 0,387                       | -0,029                     | 0,661                      | 2,570                       | 0,520      | 0,884      | 0,835      |
| -0,525        | -1,348         | -1,406                      | -1,388                      | -1,330                     | -1,277                     | 0,068                       | 1,266      | 1,314      | 1,603      |
| 0,478         | 0,111          | -0,099                      | -0,085                      | -0,077                     | -0,069                     | -0,078                      | 2,268      | 2,496      | 2,496      |
| -0,936        | -0,941         | 1,043                       | -0,963                      | 0,333                      | 1,457                      | -0,968                      | 1,745      | 2,013      | 2,059      |
| 0,277         | 0,003          | -0,942                      | -1,423                      | -1,378                     | -1,313                     | -1,362                      | 0,748      | 0,194      | 1,607      |
| -0,667        | 0,081          | -0,680                      | -0,971                      | 1,151                      | -0,964                     | -0,957                      | 0,966      | 1,211      | 0,313      |
| 0,416         | 1,754          | 0,185                       | 1,839                       | 0,631                      | 0,671                      | -0,079                      | -1,072     | -0,335     | 0,079      |
| 1,542         | 1,301          | -0,571                      | 0,016                       | -0,248                     | 0,186                      | -0,472                      | 0,162      | -0,217     | 0,124      |
| -0,689        | -0,163         | -0,701                      | -0,090                      | 0,539                      | -0,683                     | -0,687                      | 1,452      | 1,748      | 2,563      |
| 0,452         | -1,574         | -1,071                      | -0,559                      | 0,180                      | 0,925                      | 0,312                       | -0,167     | -1,445     | 0,456      |
| -0,636        | -0,817         | -0,676                      | -1,630                      | -1,519                     | -1,952                     | -2,339                      | 1,842      | 1,820      | 2,081      |
| 0,932         | 0,749          | 0,241                       | -0,318                      | 0,395                      | 0,124                      | 0,340                       | -0,023     | -0,160     | -0,042     |
| 0,924         | -0,650         | 0,341                       | 0,116                       | 0,282                      | -0,477                     | -0,411                      | 0,643      | 0,262      | -0,116     |
| 0,458         | 0,514          | -2,118                      | -1,236                      | -1,773                     | -1,452                     | -0,953                      | 0,673      | 0,516      | 0,889      |
| 2,584         | 3,298          | 0,577                       | 0,451                       | 0,397                      | 0,288                      | 0,204                       | -0,779     | -0,884     | -0,899     |
| 0,604         | 0,601          | -0,023                      | -0,652                      | 0,238                      | -0,042                     | 0,295                       | -0,084     | 0,031      | -0,104     |
| -0,462        | -0,623         | 0,128                       | 0,028                       | -0,660                     | -0,065                     | 0,066                       | 0,710      | 0,773      | 1,078      |
| -0,068        | 0,089          | 2,834                       | -0,087                      | 0,880                      | 1,562                      | 2,387                       | -0,169     | 0,068      | 0,078      |
| -0,543        | 0,428          | -0,690                      | -0,170                      | -1,043                     | 0,160                      | -0,215                      | 0,846      | 0,442      | 0,807      |
| 0,601         | 0,677          | -0,493                      | -0,136                      | -0,347                     | -0,212                     | -0,056                      | 0,308      | 0,344      | 0,261      |
| 1,770         | 1,875          | 0,390                       | 0,755                       | 1,130                      | 0,885                      | 0,611                       | -1,140     | -0,789     | -0,504     |
| 0,548         | -0,357         | -1,040                      | -1,598                      | -2,029                     | -2,054                     | -0,109                      | 1,561      | 1,544      | 1,508      |
| 0,470         | -0,438         | 1,058                       | 0,055                       | -0,157                     | -0,943                     | -0,088                      | 1,342      | 0,487      | 0,576      |
| 1,718         | 1,894          | -0,576                      | 0,103                       | -0,351                     | -0,524                     | -0,529                      | 0,077      | 0,066      | -0,066     |
| 0,002         | -0,446         | -0,597                      | -1,298                      | -0,489                     | -1,526                     | -0,740                      | 1,495      | 1,966      | 2,065      |
| 0,249         | 0,013          | -0,984                      | -0,406                      | -0,317                     | 0,100                      | -0,965                      | -0,013     | 0,309      | 0,101      |
| 0,469         | 1,256          | 0,208                       | 1,634                       | -0,082                     | 0,727                      | -0,175                      | 0,185      | -0,697     | 0,010      |
| -0,606        | -0,176         | -0,743                      | -1,723                      | -1,532                     | -1,397                     | -1,278                      | 1,470      | 1,541      | 1,616      |
| 1,909         | 2,117          | -0,341                      | 0,339                       | -0,028                     | -0,043                     | -0,322                      | 0,028      | 0,060      | -0,168     |
| 0,541         | 0,753          | 0,009                       | 0,363                       | -0,225                     | -0,344                     | -0,037                      | 0,388      | -0,009     | 0,719      |
| 2,868         | 3,293          | 0,992                       | 1,189                       | 0,788                      | 0,672                      | 0,321                       | -0,896     | -0,849     | -0,777     |
| 0,462         | 0,548          | -0,204                      | 0,328                       | -0,131                     | 0,131                      | -0,307                      | 0,342      | -0,229     | 0,482      |
| 0,941         | 0,568          | -1,077                      | -1,592                      | -0,932                     | -1,274                     | -1,279                      | 0,822      | 0,977      | 0,720      |
| 0,758         | 0,566          | -1,237                      | -1,531                      | -0,964                     | -0,849                     | -1,626                      | 0,613      | 1,102      | 0,386      |
| 0,813         | 0,385          | -1,187                      | -1,194                      | -1,770                     | 0,299                      | -0,889                      | 0,354      | 0,419      | 0,980      |
| 0,722         | 0,415          | -1,614                      | -1,438                      | -1,950                     | -1,929                     | -1,937                      | 0,951      | 1,348      | 1,198      |
| 1,710         | 1,221          | 0,579                       | 0,860                       | 0,836                      | 0,853                      | 0,320                       | -0,546     | -0,888     | -0,527     |
| 0,873         | 2,123          | 0,925                       | 2,259                       | 1,044                      | 1,122                      | 0,070                       | -0,365     | -0,194     | -0,070     |

|        |        |        |        |        |        |        |        |        |        |
|--------|--------|--------|--------|--------|--------|--------|--------|--------|--------|
| -0,591 | 0,139  | -2,946 | -1,366 | -2,840 | -2,591 | -2,804 | 1,511  | 1,483  | 1,509  |
| 0,762  | 0,615  | -0,317 | -0,155 | 0,092  | 0,192  | -0,305 | -0,092 | -0,236 | 0,161  |
| -2,136 | -2,161 | -2,140 | -2,160 | -2,135 | -2,162 | -2,162 | 3,493  | 3,551  | 3,542  |
| 3,590  | 3,412  | 1,039  | 1,974  | 2,056  | 1,927  | 1,472  | -1,039 | -1,119 | -1,140 |
| 0,239  | 1,086  | -0,065 | 0,710  | 0,480  | -0,076 | -0,377 | -0,378 | 0,065  | -0,381 |
| 0,025  | 0,050  | -1,414 | -0,949 | -1,162 | -1,546 | -1,411 | 1,335  | 1,316  | 1,368  |
| 3,287  | 2,938  | 2,022  | 2,608  | 2,294  | 2,326  | 1,784  | -1,916 | -2,347 | -1,784 |
| 0,320  | -0,393 | -0,435 | -0,430 | -0,388 | -0,344 | -0,375 | 2,290  | 1,740  | 2,182  |
| 1,882  | 2,041  | -0,220 | 0,366  | 0,083  | -0,040 | -0,333 | 0,018  | -0,018 | -0,123 |
| 2,140  | 3,029  | 1,854  | 2,676  | 1,818  | 1,626  | 0,601  | -0,718 | -1,133 | -0,601 |
| 0,558  | -0,020 | -0,443 | 0,065  | -0,132 | 0,020  | -1,244 | 0,296  | 0,108  | 0,446  |
| -0,232 | -0,920 | -0,990 | -0,952 | -0,939 | -0,912 | -0,904 | 1,940  | 2,595  | 2,460  |
| 0,462  | 1,090  | 0,063  | 0,392  | 0,432  | 0,793  | 0,280  | -0,931 | -0,860 | -0,704 |
| 0,846  | 0,235  | 0,409  | -0,357 | 0,044  | 0,425  | -0,044 | -0,297 | 0,488  | 0,633  |
| -1,354 | -1,260 | -1,758 | -1,765 | -1,785 | -0,859 | -1,741 | 1,982  | 2,258  | 2,255  |
| -0,335 | -0,257 | -0,499 | -1,174 | -0,616 | -1,583 | -1,134 | 1,575  | 1,416  | 1,692  |
| 1,072  | 0,512  | -0,045 | -0,163 | -1,364 | 0,069  | 0,288  | 0,677  | 0,646  | 1,034  |
| 1,553  | 1,155  | 0,689  | 1,155  | 0,810  | 1,231  | 0,587  | -1,122 | -0,685 | -0,658 |
| 1,961  | 2,300  | 0,900  | 2,094  | 1,193  | 1,400  | 0,459  | -0,629 | -0,579 | -0,608 |
| -0,505 | 0,586  | -0,206 | 0,287  | 0,250  | 0,320  | -0,329 | 0,642  | 0,032  | 0,358  |
| 0,476  | 0,381  | -0,520 | -0,191 | -0,377 | 0,353  | -0,450 | 0,541  | 0,385  | 0,718  |
| 0,577  | 0,595  | -0,195 | 0,172  | -0,023 | 0,085  | 0,076  | -0,299 | 0,023  | -0,032 |
| 0,992  | 1,142  | -1,422 | -0,116 | -0,016 | -0,724 | 0,621  | 0,185  | 0,094  | 0,137  |
| -1,448 | -1,168 | -2,091 | -0,534 | -2,051 | -2,044 | -2,050 | 1,386  | 2,135  | 1,926  |
| 0,446  | 1,487  | 0,387  | 1,510  | -0,265 | 0,043  | -0,590 | 0,011  | -0,011 | -0,022 |
| 0,724  | 0,021  | 0,242  | 0,084  | 0,113  | -0,104 | 0,000  | 0,132  | 0,237  | 0,000  |
| 0,557  | 0,581  | -0,037 | 0,292  | 0,408  | 0,088  | -0,141 | -0,248 | -0,614 | -0,033 |
| 1,903  | 1,536  | -0,145 | 0,455  | 0,763  | 0,807  | 0,211  | -0,460 | -0,466 | -0,265 |
| -0,006 | 0,039  | -0,813 | -1,245 | -0,895 | -0,768 | -1,143 | 1,325  | 1,050  | 0,843  |
| 1,974  | 1,667  | 0,945  | 1,538  | 1,642  | 1,396  | 1,130  | -2,002 | -1,885 | -1,496 |
| -1,091 | -0,826 | -0,749 | 0,186  | -0,333 | -1,409 | -0,009 | 1,219  | 0,880  | 0,602  |
| 0,498  | 0,903  | 0,136  | 0,249  | 0,827  | -0,026 | 0,197  | -0,412 | -0,855 | 0,026  |
| -1,332 | -0,684 | -2,144 | -1,637 | -1,423 | -2,271 | -3,229 | 1,902  | 1,855  | 1,751  |
| 1,128  | 1,170  | -0,254 | 0,053  | -0,455 | -0,401 | -0,796 | 0,200  | 1,695  | 0,381  |
| -1,066 | -0,536 | 0,694  | -1,105 | -0,759 | -0,749 | -0,373 | 0,201  | 1,162  | 1,191  |
| -0,038 | 0,441  | -0,046 | -0,378 | -0,241 | 0,639  | 0,541  | 0,626  | 1,608  | 0,969  |
| -0,623 | 0,177  | -1,265 | -0,464 | -1,524 | -1,453 | -0,398 | 1,624  | 0,839  | 1,205  |
| 0,803  | 0,525  | -0,874 | -0,278 | 0,210  | -0,186 | -0,698 | 0,215  | 0,359  | 0,186  |
| 0,383  | 0,119  | -0,638 | -0,728 | -0,084 | 0,072  | -0,563 | -0,053 | 0,053  | 0,166  |
| 0,009  | 0,384  | -0,551 | 0,205  | -0,009 | 0,068  | -1,224 | -0,023 | 0,150  | 0,196  |
| -1,207 | 0,046  | -0,244 | -0,046 | -0,822 | -0,223 | -0,820 | 2,335  | 1,194  | 1,381  |
| 1,850  | 1,504  | 1,039  | 1,196  | 1,035  | 1,210  | 0,291  | -0,959 | -0,492 | -0,492 |
| 1,275  | 1,538  | 0,894  | 0,519  | 0,884  | 0,858  | 0,509  | -0,509 | -0,623 | -0,561 |
| 1,183  | 1,487  | 0,855  | 1,295  | 1,851  | 1,272  | 1,104  | -1,521 | -2,361 | -1,446 |
| 1,768  | 1,539  | -0,146 | 0,285  | 0,250  | 0,006  | -0,639 | -0,155 | 0,172  | 0,489  |
| 0,392  | 1,080  | -0,470 | 1,024  | -0,262 | -0,026 | -0,682 | 0,523  | 0,311  | 0,681  |
| 0,000  | -0,001 | 0,573  | -0,003 | -0,002 | -0,006 | -0,005 | 2,494  | 1,939  | 2,142  |
| 1,657  | 1,157  | 0,723  | 1,277  | 1,126  | 1,053  | 0,436  | -0,743 | -0,436 | -0,482 |
| 1,317  | 1,420  | -0,508 | 0,103  | 0,246  | -0,013 | -1,009 | 0,013  | -0,152 | 0,204  |
| 0,018  | 0,398  | -0,619 | 0,198  | 0,076  | -0,543 | -1,058 | 0,405  | 0,633  | 0,620  |
| 0,022  | 0,867  | -1,117 | -0,022 | 0,638  | 0,167  | -0,575 | -0,055 | 0,142  | 0,439  |
| -1,063 | -0,999 | 0,159  | 0,008  | -0,738 | -1,024 | 0,079  | 0,421  | 0,880  | 1,133  |
| 0,441  | 0,157  | -0,372 | 0,019  | -0,685 | 0,496  | -0,175 | 0,435  | 0,176  | 0,748  |

| wt_stim_14 | wt_stim_15 | CD4creGARPII-fl_stim_24 | CD4creGARPII-fl_stim_25 | CD4creGARPII-fl_stim_18 | CD4creGARPII-fl_stim_19 | CD4creGARPII-fl_stim_20 | Refseq       |
|------------|------------|-------------------------|-------------------------|-------------------------|-------------------------|-------------------------|--------------|
| 3,538      | 3,707      | -3,751                  | -3,538                  | -3,994                  | -4,058                  | -4,571                  | NM_001113379 |
| -1,120     | -1,843     | -6,770                  | -5,372                  | -7,106                  | -6,505                  | -6,224                  | NM_001162938 |
| 0,553      | 0,905      | -4,340                  | -5,221                  | 0,526                   | -4,469                  | -5,653                  |              |
| 0,518      | 0,906      | -3,899                  | -4,805                  | 0,453                   | -4,118                  | -5,167                  | NM_133362    |
| 2,452      | 2,155      | -1,889                  | -1,677                  | -1,870                  | -1,859                  | -1,862                  | NM_178165    |
| 1,455      | 1,648      | -1,209                  | -0,196                  | -1,210                  | -0,283                  | -1,205                  | NM_178405    |
| -0,765     | -2,086     | -4,279                  | -4,279                  | -4,269                  | -4,262                  | -4,259                  | NM_001162938 |
| 1,156      | 0,897      | -1,520                  | -1,685                  | -1,513                  | -1,760                  | -1,632                  | NM_001083318 |
| 1,311      | 1,600      | -1,436                  | -1,558                  | -3,171                  | -2,815                  | -1,767                  | NM_009690    |
| 1,228      | 1,598      | -0,040                  | -1,209                  | -1,200                  | 0,040                   | -1,180                  |              |
| 2,195      | 2,374      | 0,069                   | -0,096                  | -0,081                  | 2,201                   | -0,088                  | NM_201531    |
| 2,173      | 1,642      | 0,513                   | -0,935                  | -0,384                  | 1,652                   | -0,923                  | NM_027810    |
| 1,092      | 2,063      | 0,139                   | 0,367                   | -1,353                  | -1,370                  | -1,303                  | NM_201531    |
| 1,140      | 1,696      | 0,463                   | -0,941                  | -0,970                  | -0,070                  | -0,983                  |              |
| -0,757     | -0,148     | -2,351                  | -2,391                  | -2,398                  | -2,479                  | -2,417                  |              |
| -0,016     | 0,338      | -2,884                  | -1,942                  | -1,830                  | -1,269                  | -1,790                  | NM_138665    |
| 2,030      | 2,458      | 0,090                   | -0,686                  | 1,466                   | 1,361                   | -0,671                  |              |
| 0,285      | 0,925      | -1,603                  | -1,587                  | -1,578                  | -1,485                  | -1,593                  |              |
| 1,040      | 0,506      | 0,709                   | -0,097                  | -0,025                  | 0,376                   | -0,029                  | NM_001177666 |
| -0,057     | 0,023      | -1,807                  | -1,638                  | -1,853                  | -1,650                  | -1,899                  | NM_009003    |
| 0,180      | 1,008      | -1,584                  | -0,898                  | -1,499                  | -1,572                  | -0,164                  | NM_029070    |
| 1,105      | 0,940      | -0,846                  | -0,228                  | -1,466                  | -0,360                  | -1,177                  | NM_175414    |
| -1,323     | -0,204     | -2,658                  | -2,595                  | -1,815                  | -2,385                  | -2,608                  | NM_026323    |
| 0,023      | 0,329      | -1,606                  | -1,644                  | -1,992                  | -1,534                  | -1,821                  | NM_009003    |
| 1,455      | 0,679      | -1,580                  | -0,269                  | -1,559                  | -0,672                  | -0,838                  | NM_001033877 |
| -0,375     | -0,351     | -1,045                  | -1,409                  | -1,915                  | -1,769                  | -2,003                  | NM_001205355 |
| 0,311      | 1,974      | -0,316                  | -0,778                  | 0,417                   | -0,984                  | -0,927                  | NM_138650    |
| 0,401      | 0,056      | -1,143                  | -1,252                  | -1,520                  | -1,249                  | -0,958                  | NM_001039493 |
| -0,438     | -0,390     | -1,220                  | -1,453                  | -2,029                  | -2,030                  | -2,575                  |              |
| 1,247      | 1,231      | -0,014                  | 0,014                   | -1,015                  | -1,197                  | 0,228                   |              |
| 1,446      | 1,611      | -0,171                  | -0,055                  | -0,940                  | 0,450                   | -0,300                  |              |
| 0,259      | 0,535      | -1,172                  | -1,344                  | -2,213                  | -1,429                  | -1,497                  | NM_173786    |
| 0,972      | 0,438      | 0,384                   | -0,002                  | -0,899                  | 0,256                   | -0,149                  | NM_001177666 |
| 0,036      | 0,109      | -1,393                  | -1,855                  | -1,237                  | -0,844                  | -1,498                  |              |
| -0,010     | -0,522     | -0,437                  | -1,484                  | -1,980                  | -0,603                  | -2,130                  |              |
| 0,641      | 1,204      | 0,303                   | -0,016                  | -0,001                  | 0,236                   | -0,150                  | XR_106831    |
| 0,273      | 0,697      | -0,876                  | -1,020                  | -1,429                  | -1,477                  | -1,390                  | NM_001168660 |
| 0,779      | -0,254     | -1,352                  | -0,415                  | -1,224                  | -0,579                  | -1,032                  | NM_028593    |
| -0,973     | -0,321     | -2,845                  | -2,317                  | -2,153                  | -2,197                  | -2,250                  | NM_001033460 |
| 0,465      | -0,448     | -1,004                  | -1,477                  | -1,039                  | -0,882                  | -1,124                  |              |
| 0,917      | 0,423      | -0,989                  | -0,423                  | -0,552                  | -0,437                  | -0,683                  |              |
| 0,383      | 0,243      | -1,675                  | -0,243                  | -0,755                  | -1,092                  | -0,982                  |              |
| 0,900      | -0,266     | -0,980                  | -0,729                  | -0,972                  | 0,556                   | -0,948                  |              |
| 1,481      | 0,918      | 0,000                   | -0,161                  | -1,117                  | 0,400                   | -0,632                  |              |
| -0,320     | -2,376     | -1,658                  | -1,857                  | -1,888                  | -2,131                  | -2,509                  | NM_144551    |
| -0,691     | -0,732     | -1,121                  | -1,698                  | -1,858                  | -1,436                  | -2,143                  |              |

|        |        |        |        |        |        |        |              |
|--------|--------|--------|--------|--------|--------|--------|--------------|
| 1,756  | 1,030  | 0,179  | -0,210 | 1,474  | 0,342  | -0,072 |              |
| 0,166  | 0,966  | -1,139 | -1,488 | -0,123 | -1,264 | -0,504 | NM_001081020 |
| 4,331  | 3,826  | 2,135  | 2,189  | 2,591  | 2,705  | 2,276  | NM_028408    |
| -1,126 | -1,533 | -2,464 | -1,876 | -2,399 | -2,112 | -2,425 | NM_001162938 |
| 0,086  | 0,139  | -0,553 | -1,193 | -1,206 | -0,636 | -1,799 |              |
| 1,509  | 0,989  | 0,223  | -0,025 | 0,086  | 0,401  | -0,033 |              |
| -1,869 | -1,968 | -3,252 | -3,162 | -3,150 | -4,143 | -3,091 | NM_001162938 |
| 1,201  | 2,806  | 1,826  | 1,052  | -0,320 | 0,942  | 0,610  | NM_015755    |
| 0,299  | 0,779  | -0,920 | -0,910 | -1,260 | -1,251 | -1,219 | NM_173786    |
| -1,250 | -0,882 | -1,326 | -1,231 | -2,108 | -2,175 | -3,232 |              |
| 0,207  | -0,331 | -1,268 | -1,178 | -1,017 | -0,048 | -0,391 |              |
| 3,161  | 1,298  | 1,346  | 1,256  | 0,795  | 2,337  | 0,232  | NM_009317    |
| -1,003 | -0,063 | -2,492 | -2,236 | -1,619 | -1,455 | -2,062 | NM_144796    |
| 1,006  | -0,582 | -0,540 | -0,781 | -0,707 | -0,411 | -0,948 |              |
| 2,089  | 2,848  | 1,064  | 0,859  | 1,398  | 1,647  | 0,893  | NM_008006    |
| 1,010  | 0,357  | 0,490  | 0,227  | 0,045  | 0,456  | -0,078 | NM_001039244 |
| 0,667  | -0,052 | -0,445 | -0,520 | -0,497 | -0,580 | -1,309 | NM_001011687 |
| -0,587 | -1,470 | -2,285 | -1,871 | -0,957 | -1,825 | -2,505 |              |
| -0,459 | -1,516 | -1,949 | -2,340 | -1,777 | -1,523 | -1,745 |              |
| -0,392 | -0,341 | -1,420 | -0,032 | -0,470 | -1,155 | -1,137 | NM_133654    |
| 1,065  | -0,207 | -0,651 | -0,824 | -0,222 | -0,131 | -0,627 | NR_024323    |
| 0,279  | -0,740 | -1,421 | -1,086 | -1,195 | -1,196 | -0,819 | NM_198306    |
| -0,552 | 0,016  | -1,998 | -0,674 | -1,049 | -2,358 | -0,442 | NM_001164518 |
| 1,547  | 0,940  | 0,197  | -0,022 | 0,406  | 0,691  | 1,000  | NM_013869    |
| 0,071  | -0,831 | -0,824 | -1,136 | -2,151 | -0,708 | -1,537 |              |
| 0,180  | -0,199 | -0,992 | 0,159  | -1,071 | -0,620 | -1,017 |              |
| 0,033  | 0,158  | -1,141 | -1,145 | -1,297 | -1,019 | -0,543 |              |
| -0,222 | 0,145  | -2,216 | -1,809 | -0,772 | -1,372 | -1,015 | NM_011374    |
| 0,864  | 1,189  | -0,300 | 0,745  | -0,253 | 0,470  | -0,053 |              |
| -2,269 | -0,945 | -2,597 | -3,054 | -3,907 | -2,988 | -2,033 | NM_001033378 |
| 1,140  | 1,108  | -1,187 | 0,009  | 0,109  | -0,121 | 0,796  |              |
| -0,385 | -0,597 | -1,507 | -0,721 | -1,848 | -1,848 | -1,200 |              |
| 1,111  | 2,397  | 0,762  | 0,568  | 0,876  | 1,142  | 0,327  | NM_007992    |
| -0,053 | 0,219  | -0,422 | -0,783 | -0,989 | -0,855 | -1,114 | NM_008923    |
| 0,637  | 1,416  | 0,143  | 0,089  | -1,045 | 0,177  | -0,558 |              |
| 0,481  | 0,631  | 0,038  | -0,440 | -1,426 | -0,211 | -1,422 |              |
| 0,782  | 0,631  | 0,540  | -0,230 | -1,451 | -1,151 | 0,492  |              |
| 0,405  | -0,485 | -0,849 | -0,850 | -1,020 | -0,288 | -0,857 | NM_001197321 |
| 0,089  | 0,111  | -1,458 | -0,916 | -0,667 | -0,977 | -1,580 |              |
| 0,216  | 0,714  | -1,276 | -0,865 | -0,754 | -0,360 | -1,123 | NM_001024617 |
| 1,633  | 1,484  | 0,100  | -0,507 | 0,477  | 0,425  | 0,466  | NM_016846    |
| -1,312 | -0,291 | -1,519 | -1,175 | -1,561 | -1,530 | -1,537 |              |
| -0,887 | -0,552 | -1,286 | -1,592 | -1,611 | -1,316 | -2,028 | NM_010357    |
| -1,955 | -0,855 | -2,734 | -2,911 | -2,145 | -2,070 | -2,548 | NR_003967    |
| -0,006 | -0,190 | -1,032 | -1,163 | -0,760 | -0,751 | -1,136 | NM_008606    |
| 0,097  | -0,204 | -0,710 | -0,703 | -1,028 | -0,719 | -0,453 |              |
| 2,266  | 2,177  | -0,005 | 1,698  | 1,627  | 1,158  | -0,006 |              |
| -0,499 | -1,409 | -1,518 | -1,225 | -1,708 | -1,920 | -1,421 |              |
| -0,255 | 0,045  | -1,428 | -1,005 | -0,654 | -0,749 | -1,201 | NM_008606    |
| 0,639  | -0,325 | -0,544 | -0,396 | -0,332 | -0,479 | -0,165 |              |
| -0,568 | 0,074  | -1,907 | -0,941 | -1,902 | -0,822 | -0,699 |              |
| 1,004  | 1,208  | -0,150 | 0,385  | 0,523  | -0,008 | -0,070 | NM_172392    |
| -0,203 | 0,917  | -0,654 | -0,019 | -0,949 | -0,268 | -0,573 | NM_133249    |



GeneID

434215

100033459

170942

229499

98660

100033459

27049

11801

382571

71492

382571

192166

633640

19341

74720

109246

67701

19341

233332

229474

110197

241075

21473

223672

633640

100044171

71898

73649

381738

75842

217410

108154  
72978  
100033459

100033459  
26559  
223672

21350  
96935

14173  
633640  
497071

12490  
74629  
231605  
210094  
29820

20449  
14114  
319493

14115  
19085

108655

234515  
19731

14860  
209380  
17385

17385

627872  
268670  
170826

| SeqID   | ProbeID       | GeneName       |
|---------|---------------|----------------|
| 2277855 | A_55_P2106690 | Tal1           |
| 2263973 | A_51_P364485  | Tnfaip2        |
| 2279870 | A_55_P2098697 | Tnfaip2        |
| 2298843 | A_51_P188271  | Cd248          |
| 2306905 | A_55_P2028365 | Lrrc36         |
| 2263599 | A_51_P142896  | Cd59a          |
| 2309813 | A_52_P244193  | Cd24a          |
| 2263382 | A_55_P1958275 | Bcl11a         |
| 2284426 | A_55_P2214124 | Igh-VJ558      |
| 2287004 | A_55_P2052240 | Crff1          |
| 2311495 | A_55_P1995404 | Cd59b          |
| 2304506 | A_52_P219473  | Cdc6           |
| 2276432 | A_55_P1988872 | ENSMUST0000010 |
| 2279875 | A_55_P2003915 | ENSMUST0000010 |
| 2274189 | A_51_P234140  | Cdk1           |
| 2309975 | A_51_P407657  | ENSMUST0000010 |
| 2264330 | A_55_P2075510 | ENSMUST0000010 |
| 2279664 | A_51_P339793  | Il1r1          |
| 2262785 | A_51_P204913  | Bag2           |
| 2299838 | A_51_P481920  | Ccna2          |
| 2274720 | A_55_P2065671 | Ccnb1          |
| 2288815 | A_51_P170807  | Map3k6         |
| 2267381 | A_52_P296913  | Cnm1           |
| 2304290 | A_55_P1956718 | Rab38          |
| 2273712 | A_51_P408946  | Ccne1          |
| 2271387 | A_51_P253803  | Mki67          |
| 2272460 | A_55_P1960148 | AK007826       |
| 2306362 | A_55_P2130497 | ENSMUST0000010 |
| 2261055 | A_55_P2030299 | LOC544904      |
| 2281467 | A_66_P114695  | Cdc25c         |
| 2300786 | A_51_P457528  | Ccnb2          |
| 2309991 | A_55_P2140348 | Igh-VJ558      |
| 2264083 | A_55_P2129092 | Cdc42bpa       |
| 2282178 | A_51_P487690  | Ifi44          |
| 2293227 | A_55_P2039324 | Ccnf           |
| 2301420 | A_66_P125327  | Ccne1          |
| 2289773 | A_55_P1952256 | Ccnb1          |
| 2301481 | A_66_P128434  | Kit            |
| 2308773 | A_51_P405638  | LOC100045791   |
| 2259200 | A_52_P30641   | ENSMUST0000010 |
| 2274816 | A_55_P2011950 | LOC435333      |
| 2288305 | A_55_P2079079 | Cd19           |
| 2267667 | A_55_P2075393 | LOC100047132   |
| 2260536 | A_55_P2096395 | Cdc42bpa       |
| 2302604 | A_51_P137111  | Chek2          |
| 2278881 | A_52_P30989   | Cdkn3          |

|         |               |                |
|---------|---------------|----------------|
| 2302014 | A_51_P155142  | Cdca8          |
| 2286831 | A_51_P427917  | Il31ra         |
| 2290025 | A_55_P1975874 | Bcl2l15        |
| 2264647 | A_55_P1959421 | ENSMUST0000010 |
| 2302700 | A_55_P2092869 | Anxa9          |
| 2267713 | A_52_P112190  | LOC100047053   |
| 2303584 | A_52_P451073  | Tnfrsf21       |
| 2289563 | A_55_P1977451 | ENSMUST0000010 |
| 2295190 | A_55_P2096402 | Cdc42bpa       |
| 2258389 | A_55_P2087429 | LOC100047162   |
| 2259508 | A_55_P2170681 | Cdca8          |
| 2300047 | A_51_P312035  | Cd300e         |
| 2303607 | A_55_P2001267 | XM_001472404   |
| 2311760 | A_55_P2105878 | Ccr10          |
| 2262726 | A_51_P473170  | Tnfsf4         |
| 2312288 | A_51_P130095  | Fcgr2b         |
| 2307080 | A_51_P125135  | Cdca5          |
| 2277727 | A_52_P661044  | Ccr3           |
| 2266724 | A_55_P1996946 | Cdc20          |
| 2265415 | A_52_P186262  | ENSMUST0000010 |
| 2270408 | A_52_P546162  | ENSMUST0000010 |
| 2291622 | A_55_P1965050 | Cks2           |
| 2258591 | A_55_P1965338 | Anxa8          |
| 2306096 | A_51_P375146  | Cd36           |
| 2262852 | A_55_P2027737 | Il1r1          |
| 2285899 | A_55_P2058028 | ENSMUST0000010 |
| 2287578 | A_55_P1986282 | Cdkn1a         |
| 2266536 | A_55_P2058023 | ENSMUST0000010 |
| 2307552 | A_51_P117581  | Cables1        |
| 2279139 | A_55_P2065510 | ENSMUST0000010 |
| 2281798 | A_55_P2066578 | Ifi204         |
| 2310147 | A_51_P284608  | Cd74           |
| 2264800 | A_51_P227004  | Cks1b          |
| 2272946 | A_55_P2092826 | Anxa1          |
| 2295994 | A_51_P241457  | Lilrb4         |
| 2306283 | A_55_P2137496 | LOC100047815   |
| 2286855 | A_55_P2061495 | Cks1b          |
| 2279835 | A_51_P271503  | Il1r1          |



| Description                                                                                                 | ANOVA p-value |
|-------------------------------------------------------------------------------------------------------------|---------------|
| Mus musculus T-cell acute lymphocytic leukemia 1 (Tal1), mRNA [NM_011527]                                   | 2,68E-07      |
| Mus musculus tumor necrosis factor, alpha-induced protein 2 (Tnfaip2), mRNA [NM_001105221]                  | 1,78E-07      |
| Mus musculus tumor necrosis factor, alpha-induced protein 2 (Tnfaip2), mRNA [NM_001105221]                  | 1,85E-07      |
| Mus musculus CD248 antigen, endosialin (Cd248), mRNA [NM_054042]                                            | 1,69E-08      |
| Mus musculus leucine rich repeat containing 36 (Lrrc36), transcript variant 1, mRNA [NM_011527]             | 2,39E-05      |
| Mus musculus CD59a antigen (Cd59a), transcript variant 2, mRNA [NM_007652]                                  | 5,22E-07      |
| Mus musculus CD24a antigen (Cd24a), mRNA [NM_009846]                                                        | 8,58E-09      |
| Mus musculus B-cell CLL/lymphoma 11A (zinc finger protein) (Bcl11a), transcript variant 1, mRNA [NM_011527] | 4,65E-09      |
| Mus musculus immunoglobulin heavy chain complex, mRNA (cDNA clone MGC:30346)                                | 1,89E-14      |
| Mus musculus cytokine receptor-like factor 1 (Crfl1), mRNA [NM_018827]                                      | 3,84E-04      |
| Mus musculus CD59b antigen (Cd59b), mRNA [NM_181858]                                                        | 3,26E-04      |
| Mus musculus cell division cycle 6 homolog (S. cerevisiae) (Cdc6), transcript variant 1, mRNA [NM_011527]   | 3,08E-06      |
| Mus musculus B-cell CLL/lymphoma 11A (zinc finger protein) (Bcl11a), transcript variant 2, mRNA [NM_011527] | 2,63E-07      |
| immunoglobulin kappa variable 6-13 [Source:MGI Symbol;Acc:MGI:1330829] [ENSMUSG:0000011527]                 | 1,04E-09      |
| Mus musculus cyclin-dependent kinase-like 1 (CDC2-related kinase) (Cdkl1), mRNA [NM_011527]                 | 1,57E-02      |
| immunoglobulin kappa chain variable 19-93 [Source:MGI Symbol;Acc:MGI:107617] [ENSMUSG:0000011527]           | 3,95E-09      |
| immunoglobulin heavy variable V1-23 [Source:MGI Symbol;Acc:MGI:3815050] [ENSMUSG:0000011527]                | 6,33E-10      |
| Mus musculus interleukin 1 receptor-like 1 (Il1rl1), transcript variant 2, mRNA [NM_010707]                 | 6,08E-03      |
| Mus musculus BCL2-associated athanogene 2 (Bag2), mRNA [NM_145392]                                          | 1,29E-06      |
| Mus musculus cyclin A2 (Ccna2), mRNA [NM_009828]                                                            | 1,06E-04      |
| Mus musculus cyclin B1 (Ccnb1), mRNA [NM_172301]                                                            | 3,92E-05      |
| Mus musculus mitogen-activated protein kinase kinase kinase 6 (Map3k6), mRNA [NM_011527]                    | 3,57E-04      |
| Mus musculus cyclin M1 (Cnm1), mRNA [NM_031396]                                                             | 8,74E-06      |
| Mus musculus RAB38, member of RAS oncogene family (Rab38), mRNA [NM_028238]                                 | 1,15E-05      |
| Mus musculus cyclin E1 (Ccne1), mRNA [NM_007633]                                                            | 1,20E-05      |
| Mus musculus antigen identified by monoclonal antibody Ki 67 (Mki67), mRNA [NM_001105221]                   | 4,09E-04      |
| PREDICTED: Mus musculus immunoglobulin heavy chain (J558 family) (Igh-VJ558), mRNA [NM_011527]              | 4,37E-17      |
| immunoglobulin heavy variable V1-67 [Source:MGI Symbol;Acc:MGI:3645228] [ENSMUSG:0000011527]                | 1,13E-12      |
| immunoglobulin heavy variable V14-3 [Source:MGI Symbol;Acc:MGI:4439764] [ENSMUSG:0000011527]                | 1,50E-11      |
| Mus musculus cell division cycle 25 homolog C (S. pombe) (Cdc25c), mRNA [NM_009846]                         | 2,94E-05      |
| Mus musculus cyclin B2 (Ccnb2), mRNA [NM_007630]                                                            | 1,15E-05      |
| Mus musculus immunoglobulin heavy chain complex, mRNA (cDNA clone MGC:118142)                               | 9,82E-10      |
| Mus musculus CDC42 binding protein kinase alpha (Cdc42bpa), mRNA [NM_0010332]                               | 7,75E-04      |
| Mus musculus interferon-induced protein 44 (Ifi44), mRNA [NM_133871]                                        | 1,68E-07      |
| Mus musculus cyclin F (Ccnf), mRNA [NM_007634]                                                              | 2,23E-06      |
| Mus musculus cyclin E1 (Ccne1), mRNA [NM_007633]                                                            | 3,32E-06      |
| Mus musculus cyclin B1 (Ccnb1), mRNA [NM_172301]                                                            | 2,33E-05      |
| Mus musculus kit oncogene (Kit), transcript variant 1, mRNA [NM_001122733]                                  | 5,64E-09      |
| immunoglobulin heavy variable V9-3 [Source:MGI Symbol;Acc:MGI:3642720] [ENSMUSG:0000011527]                 | 2,79E-08      |
| immunoglobulin kappa variable 4-86 [Source:MGI Symbol;Acc:MGI:2685305] [ENSMUSG:0000011527]                 | 5,59E-10      |
| immunoglobulin heavy variable 1-85 [Source:MGI Symbol;Acc:MGI:3645723] [ENSMUSG:0000011527]                 | 3,78E-11      |
| Mus musculus CD19 antigen (Cd19), mRNA [NM_009844]                                                          | 3,47E-04      |
| immunoglobulin kappa variable 6-20 [Source:MGI Symbol;Acc:MGI:1330836] [ENSMUSG:0000011527]                 | 2,95E-08      |
| Mus musculus CDC42 binding protein kinase alpha (Cdc42bpa), mRNA [NM_0010332]                               | 4,05E-03      |
| Mus musculus CHK2 checkpoint homolog (S. pombe) (Chek2), mRNA [NM_016681]                                   | 7,48E-05      |
| Mus musculus cyclin-dependent kinase inhibitor 3 (Cdkn3), mRNA [NM_028222]                                  | 9,93E-05      |

|                                                                                          |          |
|------------------------------------------------------------------------------------------|----------|
| Mus musculus cell division cycle associated 8 (Cdca8), mRNA [NM_026560]                  | 4,03E-05 |
| Mus musculus interleukin 31 receptor A (Il31ra), mRNA [NM_139299]                        | 9,23E-04 |
| Mus musculus BCL2-like 15 (Bcl2l15), transcript variant 1, mRNA [NM_001142959]           | 9,86E-05 |
| immunoglobulin kappa chain variable 6-29 [Source:MGI Symbol;Acc:MGI:4439616] [ENSMU      | 5,81E-09 |
| Mus musculus annexin A9 (Anxa9), transcript variant 1, mRNA [NM_001085383]               | 3,20E-04 |
| immunoglobulin kappa variable 6-32 [Source:MGI Symbol;Acc:MGI:3641634] [ENSMU            | 7,97E-11 |
| Mus musculus tumor necrosis factor receptor superfamily, member 21 (Tnfrsf21), mRNA      | 9,26E-06 |
| immunoglobulin kappa variable 4-80 [Source:MGI Symbol;Acc:MGI:4439653] [ENSMU            | 7,78E-13 |
| Mus musculus CDC42 binding protein kinase alpha (Cdc42bpa), mRNA [NM_0010332             | 5,94E-03 |
| immunoglobulin kappa variable 6-15 [Source:MGI Symbol;Acc:MGI:1330831] [ENSMU            | 1,17E-10 |
| Mus musculus cell division cycle associated 8 (Cdca8), mRNA [NM_026560]                  | 1,23E-05 |
| Mus musculus CD300e antigen (Cd300e), mRNA [NM_172050]                                   | 2,48E-03 |
| Mus musculus isolate 311 immunoglobulin heavy chain variable region mRNA, partial c      | 1,16E-09 |
| Mus musculus chemokine (C-C motif) receptor 10 (Ccr10), mRNA [NM_007721]                 | 5,02E-13 |
| Mus musculus tumor necrosis factor (ligand) superfamily, member 4 (Tnfsf4), mRNA [NM     | 1,49E-11 |
| Mus musculus Fc receptor, IgG, low affinity IIb (Fcgr2b), transcript variant 1, mRNA [NM | 2,71E-07 |
| Mus musculus cell division cycle associated 5 (Cdca5), mRNA [NM_026410]                  | 2,26E-06 |
| Mus musculus chemokine (C-C motif) receptor 3 (Ccr3), mRNA [NM_009914]                   | 4,74E-06 |
| Mus musculus cell division cycle 20 homolog (S. cerevisiae) (Cdc20), mRNA [NM_0232       | 8,23E-05 |
| immunoglobulin kappa chain variable 6-25 [Source:MGI Symbol;Acc:MGI:4439867] [E          | 2,00E-13 |
| immunoglobulin kappa variable 4-58 [Source:MGI Symbol;Acc:MGI:2685923] [ENSMU            | 2,53E-13 |
| Mus musculus CDC28 protein kinase regulatory subunit 2 (Cks2), mRNA [NM_025415]          | 1,70E-06 |
| Mus musculus annexin A8 (Anxa8), mRNA [NM_013473]                                        | 3,39E-04 |
| Mus musculus CD36 antigen (Cd36), transcript variant 2, mRNA [NM_007643]                 | 5,05E-05 |
| Mus musculus interleukin 1 receptor-like 1 (Il1rl1), transcript variant 1, mRNA [NM_0010 | 4,12E-04 |
| immunoglobulin kappa variable 4-63 [Source:MGI Symbol;Acc:MGI:3645235] [ENSMU            | 5,78E-12 |
| Mus musculus cyclin-dependent kinase inhibitor 1A (P21) (Cdkn1a), transcript variant 2   | 4,30E-11 |
| immunoglobulin kappa variable 4-57-1 [Source:MGI Symbol;Acc:MGI:2686264] [ENSM           | 1,55E-12 |
| Mus musculus CDK5 and Abl enzyme substrate 1 (Cables1), transcript variant 2, mRNA       | 1,45E-09 |
| immunoglobulin heavy variable V1-20 [Source:MGI Symbol;Acc:MGI:3644607] [ENSM            | 4,55E-11 |
| Mus musculus interferon activated gene 204, mRNA (cDNA clone MGC:18551 IMAGE             | 4,84E-04 |
| Mus musculus CD74 antigen (invariant polypeptide of major histocompatibility complex     | 7,57E-07 |
| Mus musculus CDC28 protein kinase 1b (Cks1b), mRNA [NM_016904]                           | 6,50E-06 |
| Mus musculus annexin A1 (Anxa1), mRNA [NM_010730]                                        | 4,73E-08 |
| Mus musculus leukocyte immunoglobulin-like receptor, subfamily B, member 4 (Lilrb4),     | 9,57E-07 |
| Mus musculus CD79A antigen (immunoglobulin-associated alpha), mRNA (cDNA clone           | 1,06E-08 |
| Mus musculus CDC28 protein kinase 1b (Cks1b), mRNA [NM_016904]                           | 6,32E-06 |
| Mus musculus interleukin 1 receptor, type I (Il1r1), transcript variant 1, mRNA [NM_008  | 2,03E-05 |

| Adjusted ANOVA p-value | Tukey p-value | Fold change | Log2 ratio | Median | wt_non-stim_1 | wt_non-stim_2 | wt_non-stim_3 | wt_non-stim_4 |
|------------------------|---------------|-------------|------------|--------|---------------|---------------|---------------|---------------|
| 1,58E-06               | 1,13E-05      | 19,932      | 4,317      | 6,904  | -0,406        | -0,273        | 0,377         | 0,203         |
| 1,09E-06               | 7,87E-06      | 19,576      | 4,291      | 7,822  | -0,367        | -0,383        | -0,221        | 0,343         |
| 1,13E-06               | 1,10E-05      | 15,584      | 3,962      | 7,023  | -0,652        | -0,460        | -0,079        | 0,214         |
| 1,29E-07               | 3,18E-05      | 12,978      | 3,698      | 4,184  | 1,173         | 1,159         | 0,780         | 0,597         |
| 9,68E-05               | 1,83E-04      | 12,711      | 3,668      | 3,620  | -0,050        | -0,705        | -0,261        | 0,229         |
| 2,89E-06               | 1,52E-04      | 11,786      | 3,559      | 4,159  | 0,113         | 0,063         | -0,113        | 0,416         |
| 7,06E-08               | 5,41E-06      | 11,592      | 3,535      | 8,841  | 0,657         | 0,454         | 0,691         | 0,649         |
| 4,09E-08               | 3,71E-05      | 9,389       | 3,231      | 7,075  | 0,257         | 0,501         | 0,535         | 1,049         |
| 1,36E-12               | 7,06E-06      | 8,497       | 3,087      | 10,262 | 3,018         | 1,568         | 2,828         | 2,732         |
| 1,26E-03               | 2,01E-04      | 8,421       | 3,074      | 6,711  | -0,946        | -1,138        | -0,646        | -1,289        |
| 1,09E-03               | 1,20E-03      | 7,923       | 2,986      | 2,134  | 0,004         | -0,002        | 0,017         | -0,041        |
| 1,47E-05               | 1,48E-05      | 6,788       | 2,763      | 7,696  | -2,994        | -2,808        | -2,895        | -2,794        |
| 1,55E-06               | 2,39E-03      | 6,212       | 2,635      | 5,739  | 0,271         | 0,266         | -0,036        | 0,318         |
| 1,09E-08               | 7,14E-03      | 5,352       | 2,420      | 6,521  | 2,057         | 0,600         | 0,891         | 2,141         |
| 3,80E-02               | 3,94E-02      | 5,348       | 2,419      | 2,138  | -0,248        | 1,103         | -0,266        | -0,249        |
| 3,54E-08               | 3,33E-02      | 4,857       | 2,280      | 9,436  | 1,654         | 1,455         | 2,844         | 1,827         |
| 7,07E-09               | 1,64E-02      | 4,827       | 2,271      | 5,936  | 1,318         | 2,745         | 2,574         | 0,959         |
| 1,60E-02               | 1,32E-02      | 4,656       | 2,219      | 4,575  | -0,444        | -1,375        | -1,526        | -2,263        |
| 6,63E-06               | 1,55E-05      | 4,579       | 2,195      | 9,061  | -2,537        | -2,325        | -2,336        | -2,193        |
| 3,85E-04               | 3,43E-04      | 4,380       | 2,131      | 11,879 | -2,097        | -1,652        | -1,966        | -2,189        |
| 1,53E-04               | 1,04E-04      | 4,356       | 2,123      | 10,940 | -1,999        | -1,615        | -1,900        | -2,117        |
| 1,18E-03               | 1,09E-03      | 4,272       | 2,095      | 4,772  | -1,601        | -0,721        | -0,853        | -0,718        |
| 3,84E-05               | 5,44E-05      | 4,249       | 2,087      | 5,115  | -3,224        | -2,341        | -3,237        | -2,184        |
| 4,93E-05               | 5,97E-04      | 4,187       | 2,066      | 6,362  | -0,076        | -0,285        | 0,275         | 0,321         |
| 5,13E-05               | 1,46E-04      | 4,155       | 2,055      | 12,326 | -2,463        | -2,166        | -2,369        | -2,242        |
| 1,34E-03               | 2,02E-04      | 4,056       | 2,020      | 12,761 | -1,437        | -1,177        | -1,433        | -1,673        |
| 1,94E-14               | 1,37E-06      | 4,053       | 2,019      | 14,047 | 2,644         | 1,617         | 2,475         | 2,367         |
| 3,41E-11               | 5,07E-04      | 3,840       | 1,941      | 9,697  | 1,345         | 1,539         | 2,148         | 1,650         |
| 2,83E-10               | 3,08E-03      | 3,558       | 1,831      | 11,483 | 1,607         | 1,342         | 2,012         | 1,514         |
| 1,17E-04               | 1,50E-04      | 3,543       | 1,825      | 7,105  | -1,830        | -1,678        | -2,401        | -2,067        |
| 4,93E-05               | 9,62E-05      | 3,465       | 1,793      | 11,146 | -0,421        | -0,084        | -0,239        | -0,326        |
| 1,04E-08               | 3,13E-02      | 3,425       | 1,776      | 7,989  | 1,482         | 1,615         | 1,944         | 1,574         |
| 2,42E-03               | 1,47E-03      | 3,385       | 1,759      | 3,974  | -0,942        | -2,188        | -1,052        | -1,431        |
| 1,03E-06               | 2,29E-03      | 3,340       | 1,740      | 3,951  | 0,262         | -0,208        | 0,239         | 1,469         |
| 1,09E-05               | 2,52E-04      | 3,317       | 1,730      | 9,819  | -2,287        | -2,450        | -2,532        | -2,478        |
| 1,58E-05               | 5,54E-04      | 3,276       | 1,712      | 7,250  | -3,121        | -2,421        | -2,664        | -2,958        |
| 9,46E-05               | 1,32E-04      | 3,251       | 1,701      | 8,579  | -1,749        | -1,434        | -1,812        | -1,868        |
| 4,85E-08               | 3,32E-05      | 3,240       | 1,696      | 7,847  | -0,029        | 0,068         | 0,163         | 0,029         |
| 2,02E-07               | 4,63E-02      | 3,184       | 1,671      | 8,565  | 1,359         | 1,864         | 1,294         | 0,694         |
| 6,34E-09               | 4,23E-02      | 3,180       | 1,669      | 8,696  | 2,370         | 1,584         | 2,512         | 0,951         |
| 6,22E-10               | 1,28E-02      | 3,173       | 1,666      | 10,629 | 1,808         | 1,686         | 2,282         | 1,798         |
| 1,15E-03               | 2,18E-02      | 3,147       | 1,654      | 8,944  | -0,401        | -1,145        | -1,150        | -1,302        |
| 2,13E-07               | 4,70E-02      | 3,091       | 1,628      | 6,601  | 1,137         | 0,832         | 1,381         | 0,930         |
| 1,10E-02               | 2,36E-03      | 3,078       | 1,622      | 5,332  | -0,233        | -0,935        | -0,645        | -0,948        |
| 2,78E-04               | 5,40E-04      | 3,046       | 1,607      | 6,216  | -1,764        | -1,720        | -1,736        | -2,388        |
| 3,62E-04               | 6,98E-04      | 3,036       | 1,602      | 8,032  | -0,126        | -0,059        | -0,301        | -0,338        |

|          |          |       |       |        |        |        |        |        |
|----------|----------|-------|-------|--------|--------|--------|--------|--------|
| 1,57E-04 | 1,65E-04 | 3,031 | 1,600 | 12,619 | -1,579 | -1,235 | -1,541 | -1,606 |
| 2,84E-03 | 3,41E-02 | 2,992 | 1,581 | 3,200  | -1,353 | 0,672  | -0,053 | -0,321 |
| 3,60E-04 | 2,41E-02 | 2,986 | 1,578 | 6,002  | 0,380  | 0,322  | 0,435  | 0,132  |
| 4,98E-08 | 1,84E-02 | 2,977 | 1,574 | 6,555  | 1,105  | 0,779  | 1,369  | 0,998  |
| 1,07E-03 | 1,58E-04 | 2,971 | 1,571 | 5,598  | -0,706 | -0,442 | -0,777 | -0,549 |
| 1,18E-09 | 3,33E-02 | 2,924 | 1,548 | 8,699  | 1,668  | 1,145  | 2,032  | 1,818  |
| 4,05E-05 | 2,40E-03 | 2,916 | 1,544 | 4,859  | -2,978 | -1,555 | -2,034 | -2,396 |
| 2,52E-11 | 7,06E-03 | 2,807 | 1,489 | 10,602 | 2,233  | 1,163  | 2,355  | 1,604  |
| 1,57E-02 | 2,43E-02 | 2,738 | 1,453 | 4,859  | -2,027 | -1,032 | -3,061 | -1,306 |
| 1,63E-09 | 4,97E-03 | 2,706 | 1,436 | 9,445  | 1,843  | 1,167  | 1,892  | 1,830  |
| 5,25E-05 | 1,45E-04 | 2,668 | 1,416 | 10,229 | -1,735 | -1,390 | -1,637 | -1,997 |
| 7,06E-03 | 4,75E-02 | 2,667 | 1,415 | 2,386  | 0,388  | -0,557 | -0,559 | 1,572  |
| 1,20E-08 | 7,17E-03 | 2,663 | 1,413 | 5,257  | 1,937  | 1,419  | 2,663  | 1,904  |
| 1,75E-11 | 2,71E-03 | 2,661 | 1,412 | 5,111  | 2,524  | 1,982  | 2,057  | 1,776  |
| 2,81E-10 | 1,50E-02 | 2,617 | 1,388 | 5,732  | -2,449 | -3,097 | -3,087 | -3,786 |
| 1,59E-06 | 1,98E-02 | 2,617 | 1,388 | 5,301  | -0,075 | 0,010  | -0,055 | -0,010 |
| 1,11E-05 | 4,90E-04 | 2,530 | 1,339 | 12,369 | -2,025 | -1,757 | -2,036 | -2,208 |
| 2,19E-05 | 4,60E-02 | 2,526 | 1,337 | 5,021  | 0,182  | 0,276  | 0,123  | 0,151  |
| 3,04E-04 | 1,27E-04 | 2,521 | 1,334 | 12,441 | -1,269 | -1,040 | -1,186 | -1,356 |
| 8,28E-12 | 1,99E-04 | 2,497 | 1,320 | 9,090  | 1,975  | 1,343  | 2,008  | 2,194  |
| 1,00E-11 | 2,74E-03 | 2,474 | 1,307 | 10,069 | 2,247  | 1,337  | 2,467  | 1,597  |
| 8,51E-06 | 1,68E-04 | 2,367 | 1,243 | 9,031  | -1,654 | -1,842 | -1,994 | -1,702 |
| 1,12E-03 | 1,63E-02 | 2,312 | 1,209 | 3,914  | -2,151 | -0,634 | -1,360 | -0,204 |
| 1,94E-04 | 8,81E-03 | 2,307 | 1,206 | 3,908  | -0,171 | -0,819 | -1,091 | -0,054 |
| 1,35E-03 | 6,00E-03 | 2,286 | 1,193 | 9,511  | -0,978 | -0,860 | -0,947 | -0,889 |
| 1,26E-10 | 2,60E-02 | 2,247 | 1,168 | 11,099 | 2,184  | 1,467  | 2,889  | 1,880  |
| 6,91E-10 | 1,46E-02 | 2,215 | 1,147 | 6,361  | -4,350 | -2,982 | -1,668 | -3,607 |
| 4,43E-11 | 1,52E-02 | 2,181 | 1,125 | 11,259 | 2,071  | 1,148  | 2,661  | 1,842  |
| 1,46E-08 | 6,01E-05 | 2,172 | 1,119 | 7,342  | 0,032  | -0,032 | -0,176 | -0,429 |
| 7,26E-10 | 4,92E-02 | 2,169 | 1,117 | 9,689  | 1,768  | 1,642  | 2,070  | 1,462  |
| 1,56E-03 | 1,90E-02 | 2,169 | 1,117 | 4,098  | -0,202 | -1,672 | -0,525 | -2,217 |
| 4,06E-06 | 8,71E-03 | 2,169 | 1,117 | 13,958 | 0,214  | -0,165 | -0,093 | -0,237 |
| 2,93E-05 | 3,05E-04 | 2,139 | 1,097 | 12,494 | -1,524 | -1,345 | -1,465 | -1,570 |
| 3,26E-07 | 3,72E-02 | 2,130 | 1,091 | 9,126  | 0,154  | -0,088 | 0,270  | 0,088  |
| 5,04E-06 | 4,02E-02 | 2,126 | 1,088 | 6,723  | -0,851 | -1,387 | -1,173 | -2,056 |
| 8,52E-08 | 4,84E-02 | 2,094 | 1,066 | 9,802  | 0,552  | 0,047  | 0,130  | 0,074  |
| 2,85E-05 | 3,95E-04 | 2,091 | 1,064 | 12,167 | -1,553 | -1,425 | -1,498 | -1,711 |
| 8,33E-05 | 4,50E-03 | 2,075 | 1,053 | 5,696  | -0,282 | -0,409 | -0,562 | -0,442 |

| wt_non-stim_21 | CD4creGARPII-fl_non-stim_22 | CD4creGARPII-fl_non-stim_23 | CD4creGARPII-fl_non-stim_8 | CD4creGARPII-fl_non-stim_9 | CD4creGARPII-fl_non-stim_10 | wt_stim_11 | wt_stim_12 | wt_stim_13 | wt_stim_14 |
|----------------|-----------------------------|-----------------------------|----------------------------|----------------------------|-----------------------------|------------|------------|------------|------------|
| 1,034          | 5,869                       | 1,919                       | 4,273                      | 4,520                      | 5,300                       | -1,539     | -1,775     | -0,780     | -1,234     |
| 0,904          | 5,478                       | 1,834                       | 4,070                      | 3,937                      | 4,968                       | -1,483     | -1,926     | -1,076     | -1,234     |
| 0,638          | 5,421                       | 1,686                       | 3,882                      | 3,811                      | 4,758                       | -1,608     | -2,355     | -1,137     | -1,565     |
| 1,661          | 5,917                       | 2,399                       | 4,857                      | 4,597                      | 5,558                       | -0,597     | -1,047     | -2,317     | -0,711     |
| 0,557          | 5,249                       | 1,291                       | 3,502                      | 3,619                      | 4,794                       | -1,500     | -0,010     | -0,976     | -0,016     |
| 0,920          | 5,375                       | 1,588                       | 3,672                      | 3,323                      | 4,620                       | -2,143     | -2,152     | -2,147     | -1,664     |
| 1,448          | 5,430                       | 2,168                       | 3,539                      | 4,192                      | 4,816                       | -0,917     | -0,983     | -0,833     | -0,736     |
| 1,678          | 4,606                       | 1,969                       | 3,766                      | 3,490                      | 4,401                       | -2,078     | -2,313     | -1,745     | -2,350     |
| 2,669          | 4,774                       | 5,291                       | 5,818                      | 6,266                      | 5,838                       | -5,493     | -5,571     | -5,472     | -5,730     |
| -1,099         | 3,304                       | -0,520                      | 1,185                      | 1,975                      | 2,720                       | -0,047     | 0,012      | 0,117      | 0,292      |
| 0,010          | 4,466                       | -0,020                      | 1,900                      | 2,990                      | 3,656                       | -0,099     | -0,074     | 0,002      | -0,038     |
| -1,871         | 1,423                       | -1,449                      | -0,353                     | -0,045                     | 0,983                       | 0,074      | 0,107      | 0,198      | -0,019     |
| 1,752          | 3,543                       | 1,491                       | 2,906                      | 2,590                      | 3,309                       | -2,071     | -1,849     | -2,134     | -3,884     |
| 0,328          | 3,645                       | 3,311                       | 2,523                      | 3,432                      | 2,245                       | -2,852     | -4,082     | -3,357     | -4,414     |
| 0,351          | 2,825                       | -0,255                      | 0,801                      | 2,171                      | 2,922                       | -0,238     | 0,146      | -0,239     | 0,745      |
| 0,890          | 2,156                       | 3,934                       | 3,344                      | 5,025                      | 4,313                       | -4,688     | -4,925     | -4,834     | -4,275     |
| 1,893          | 2,544                       | 4,165                       | 4,680                      | 4,288                      | 2,705                       | -4,167     | -3,386     | -4,169     | -2,157     |
| 0,623          | 1,601                       | -0,138                      | 0,191                      | 1,879                      | 0,843                       | -0,432     | -0,117     | 0,117      | -0,803     |
| -1,942         | 1,098                       | -1,400                      | -0,130                     | -0,376                     | 0,499                       | -0,019     | 0,019      | 0,089      | 0,053      |
| -0,904         | 1,431                       | -1,027                      | -0,419                     | 0,166                      | 0,746                       | 0,004      | 0,011      | -0,054     | 0,007      |
| -0,875         | 1,352                       | -0,953                      | 0,070                      | 0,223                      | 0,965                       | -0,166     | -0,070     | -0,218     | -0,290     |
| -0,407         | 1,851                       | 0,190                       | 1,375                      | 1,267                      | 1,663                       | -0,050     | -0,714     | -0,433     | -0,418     |
| -1,846         | 1,534                       | -1,101                      | -0,282                     | -0,254                     | 1,065                       | 0,259      | -0,243     | 0,466      | 0,314      |
| 0,872          | 2,564                       | 0,517                       | 2,341                      | 1,812                      | 2,552                       | -0,667     | -0,911     | -0,095     | -0,816     |
| -1,715         | 1,035                       | -1,663                      | -0,339                     | -0,187                     | 0,720                       | 0,081      | 0,030      | -0,014     | 0,072      |
| -0,004         | 1,904                       | 0,004                       | 0,235                      | 0,588                      | 1,216                       | -0,428     | -0,289     | -0,363     | -0,368     |
| 2,430          | 4,036                       | 4,285                       | 4,449                      | 4,594                      | 4,503                       | -5,922     | -5,647     | -5,419     | -5,287     |
| 1,314          | 2,704                       | 3,481                       | 3,532                      | 3,860                      | 3,470                       | -3,898     | -3,622     | -3,411     | -4,278     |
| 1,198          | 2,619                       | 3,058                       | 3,345                      | 3,777                      | 3,843                       | -3,923     | -3,943     | -3,733     | -4,048     |
| -0,696         | 1,274                       | -0,706                      | -0,413                     | -0,005                     | 0,538                       | -0,028     | -0,113     | 0,005      | 0,029      |
| 0,788          | 2,750                       | 0,940                       | 1,214                      | 1,553                      | 2,257                       | -0,374     | -0,270     | -0,418     | -0,598     |
| 1,237          | 2,012                       | 3,292                       | 3,435                      | 3,968                      | 3,350                       | -2,939     | -3,497     | -3,325     | -4,284     |
| -1,259         | 1,062                       | -1,002                      | 0,501                      | 0,290                      | 0,987                       | -0,040     | 0,241      | -0,280     | -0,534     |
| 0,531          | 2,002                       | 1,971                       | 2,096                      | 2,009                      | 1,795                       | -0,901     | -0,576     | -2,062     | -2,062     |
| -1,402         | 0,752                       | -1,363                      | -1,014                     | -0,720                     | 0,082                       | 0,023      | 0,042      | -0,023     | -0,036     |
| -2,009         | 0,888                       | -2,031                      | -0,952                     | -0,965                     | 0,029                       | 0,288      | 0,398      | 0,312      | 0,442      |
| -0,957         | 1,338                       | -0,836                      | -0,105                     | -0,047                     | 0,799                       | -0,014     | 0,268      | 0,138      | 0,003      |
| 0,961          | 1,925                       | 1,478                       | 1,765                      | 1,419                      | 1,837                       | -0,913     | -1,227     | -1,049     | -1,256     |
| 0,354          | 2,964                       | 1,850                       | 3,756                      | 2,859                      | 3,030                       | -3,395     | -3,356     | -3,499     | -3,169     |
| 1,124          | 2,582                       | 2,986                       | 3,304                      | 3,903                      | 3,253                       | -3,112     | -3,819     | -3,368     | -5,135     |
| 1,395          | 2,375                       | 3,464                       | 3,472                      | 4,076                      | 3,420                       | -3,737     | -3,716     | -3,232     | -3,893     |
| 0,198          | 0,011                       | 0,674                       | 0,297                      | 0,509                      | 1,431                       | -0,883     | -1,777     | -1,334     | -2,100     |
| 0,749          | 1,851                       | 2,559                       | 3,108                      | 3,381                      | 2,017                       | -4,704     | -3,734     | -2,423     | -2,222     |
| -0,381         | 1,798                       | -0,561                      | 0,978                      | 0,937                      | 1,529                       | 0,036      | 0,168      | 0,298      | -0,360     |
| -1,041         | 1,383                       | -1,029                      | -0,370                     | -0,129                     | 0,799                       | 0,415      | 0,525      | 0,129      | 0,454      |
| 0,972          | 2,863                       | 0,865                       | 0,997                      | 1,476                      | 2,224                       | -0,290     | -0,180     | -0,378     | -0,460     |

|        |        |        |        |        |        |        |        |        |        |
|--------|--------|--------|--------|--------|--------|--------|--------|--------|--------|
| -0,589 | 1,091  | -0,561 | -0,165 | 0,059  | 0,721  | -0,005 | 0,005  | -0,068 | -0,086 |
| 1,493  | 2,064  | 1,403  | 1,661  | 1,214  | 1,528  | 0,053  | -1,361 | -1,378 | 0,387  |
| 0,191  | 2,693  | -0,132 | 1,361  | 1,900  | 2,635  | -1,325 | -0,527 | -1,341 | -0,901 |
| 0,790  | 1,855  | 2,573  | 3,293  | 3,233  | 1,943  | -4,708 | -2,987 | -3,381 | -2,015 |
| -0,674 | 1,899  | -0,270 | 0,897  | 0,800  | 1,843  | -0,108 | 0,007  | 0,050  | 0,105  |
| 1,723  | 1,627  | 2,358  | 4,006  | 3,322  | 3,272  | -2,993 | -3,457 | -2,961 | -3,839 |
| -1,259 | 0,495  | -0,838 | -0,587 | -0,489 | -0,272 | 0,747  | 1,044  | 0,730  | 0,780  |
| 1,306  | 2,662  | 3,093  | 2,935  | 3,157  | 3,314  | -3,771 | -4,307 | -3,518 | -4,867 |
| -0,761 | 1,378  | -1,774 | 0,147  | -0,472 | 1,020  | -0,035 | 0,035  | 0,425  | 0,705  |
| 0,853  | 4,601  | 2,682  | 3,380  | 3,266  | 3,175  | -3,498 | -2,870 | -4,622 | -4,601 |
| -0,840 | 0,936  | -0,741 | -0,427 | -0,222 | 0,401  | -0,007 | 0,092  | 0,007  | -0,060 |
| 0,103  | 0,051  | 1,517  | 1,285  | 1,622  | 2,561  | -0,362 | -0,564 | -0,555 | -0,558 |
| 1,153  | 2,724  | 3,216  | 3,317  | 5,033  | 4,895  | -3,404 | -3,419 | -2,174 | -3,416 |
| 2,274  | 2,979  | 4,208  | 3,468  | 3,583  | 3,253  | -3,198 | -2,415 | -2,581 | -1,776 |
| -2,342 | -2,156 | -1,215 | -1,700 | -2,549 | -1,646 | 1,890  | 2,326  | 2,109  | 2,759  |
| 1,178  | 1,493  | 1,135  | 1,070  | 1,377  | 1,795  | -1,877 | -2,223 | -1,662 | -2,274 |
| -1,178 | 0,415  | -1,251 | -0,741 | -0,686 | 0,092  | 0,009  | 0,017  | -0,009 | -0,011 |
| 1,664  | 2,024  | 2,118  | 1,219  | 1,307  | 1,519  | -0,847 | -0,746 | -1,086 | -1,262 |
| -0,454 | 1,147  | -0,431 | 0,020  | 0,148  | 0,766  | -0,121 | -0,020 | -0,107 | -0,213 |
| 1,167  | 2,673  | 3,296  | 3,703  | 4,046  | 3,229  | -3,297 | -3,423 | -3,380 | -3,701 |
| 1,326  | 2,382  | 2,903  | 2,803  | 3,416  | 3,604  | -3,185 | -3,584 | -3,159 | -3,930 |
| -1,213 | 0,358  | -1,279 | -0,577 | -0,460 | 0,102  | 0,150  | 0,144  | 0,062  | 0,053  |
| -1,465 | 0,288  | -0,152 | -0,750 | -0,061 | -0,266 | 0,255  | 0,061  | 0,449  | 0,387  |
| -0,035 | 1,886  | 0,035  | 0,191  | 1,035  | 1,513  | -0,765 | -0,617 | -1,976 | -1,401 |
| 0,304  | 0,911  | 0,304  | -0,020 | 0,024  | 0,705  | -0,559 | -0,429 | -0,381 | -1,053 |
| 1,631  | 3,048  | 2,895  | 2,697  | 3,625  | 3,859  | -3,602 | -3,734 | -3,230 | -3,612 |
| -2,807 | -1,834 | -1,684 | -2,085 | -2,053 | -1,642 | 1,732  | 2,103  | 1,987  | 2,479  |
| 1,371  | 2,685  | 2,966  | 2,863  | 3,084  | 3,499  | -3,750 | -4,023 | -3,357 | -4,203 |
| 0,505  | 0,983  | 1,250  | 1,087  | 0,993  | 1,476  | -1,452 | -1,707 | -1,407 | -2,022 |
| 1,372  | 2,605  | 2,584  | 2,759  | 3,422  | 2,923  | -4,075 | -3,135 | -3,353 | -3,420 |
| -0,146 | 0,565  | 0,891  | 0,592  | 0,724  | 0,062  | -1,417 | -0,650 | -0,062 | -1,646 |
| 0,469  | 0,547  | 1,034  | 0,769  | 1,023  | 1,412  | -1,066 | -1,526 | -1,379 | -1,869 |
| -0,822 | 0,445  | -0,927 | -0,368 | -0,436 | 0,305  | 0,052  | 0,016  | -0,011 | -0,018 |
| 1,476  | 1,397  | 1,856  | 1,245  | 1,192  | 0,971  | -1,957 | -2,269 | -1,699 | -2,408 |
| -1,136 | 0,087  | 0,240  | -0,656 | -0,940 | -0,086 | 0,086  | 0,334  | 0,293  | -0,270 |
| 0,906  | 0,572  | 1,124  | 1,196  | 1,494  | 1,953  | -2,315 | -3,083 | -2,604 | -3,093 |
| -0,803 | 0,384  | -1,008 | -0,433 | -0,448 | 0,227  | 0,002  | 0,001  | -0,089 | -0,001 |
| -0,369 | 0,873  | 1,132  | 0,644  | 0,563  | 0,264  | -0,370 | -0,481 | -0,264 | -0,556 |

| wt_stim_15 | CD4creGARPII-fl_stim_24 | CD4creGARPII-fl_stim_25 | CD4creGARPII-fl_stim_18 | CD4creGARPII-fl_stim_19 | CD4creGARPII-fl_stim_20 | Refseq       | GeneID |
|------------|-------------------------|-------------------------|-------------------------|-------------------------|-------------------------|--------------|--------|
| -0,053     | 0,178                   | -1,172                  | 0,053                   | -0,175                  | -0,476                  | NM_011527    | 21349  |
| -1,224     | 1,003                   | 0,093                   | -0,093                  | -0,947                  | 0,518                   | NM_009396    | 21928  |
| -1,901     | 1,034                   | 0,079                   | -0,252                  | -0,931                  | 0,570                   | NM_009396    | 21928  |
| -1,190     | -1,380                  | -0,898                  | -2,337                  | -0,727                  | -0,951                  | NM_054042    | 70445  |
| -1,110     | 0,941                   | 0,010                   | 1,990                   | -1,011                  | -0,045                  | NM_001170788 | 270091 |
| -1,219     | 0,597                   | -0,063                  | -0,146                  | -2,134                  | -1,125                  | NM_007652    | 12509  |
| -0,886     | -0,490                  | -0,954                  | -0,748                  | -1,037                  | -0,454                  | NM_009846    | 12484  |
| -1,139     | -1,061                  | -1,366                  | -0,504                  | -1,245                  | -0,257                  | NM_016707    | 14025  |
| -7,360     | -1,568                  | -1,831                  | -2,058                  | -2,949                  | -2,655                  |              | 16061  |
| 0,645      | -0,255                  | -0,311                  | 0,190                   | -0,012                  | 0,050                   | NM_018827    | 12931  |
| 0,173      | -0,089                  | -0,060                  | 0,028                   | -0,037                  | -0,016                  | NM_181858    | 333883 |
| 0,235      | -0,293                  | 0,019                   | 0,106                   | 0,325                   | 0,138                   | NM_011799    | 23834  |
| -1,622     | -0,971                  | -2,158                  | -0,398                  | -1,188                  | 0,036                   | NM_001242934 | 14025  |
| -3,461     | -0,328                  | -1,277                  | -2,753                  | -2,004                  | -1,512                  |              |        |
| -0,243     | -0,246                  | -0,146                  | 0,921                   | -0,258                  | 0,396                   | NM_183294    | 71091  |
| -3,809     | -4,393                  | -1,253                  | -3,103                  | -0,890                  | -0,955                  |              |        |
| -4,171     | -1,337                  | -1,927                  | -1,862                  | -2,527                  | -0,959                  |              |        |
| -1,079     | 1,425                   | 1,576                   | -0,272                  | 0,451                   | 0,579                   | NM_010743    | 17082  |
| -0,258     | 0,301                   | 0,511                   | 0,074                   | 0,366                   | 0,160                   | NM_145392    | 213539 |
| 0,690      | -0,046                  | -0,004                  | 0,180                   | 0,324                   | 0,130                   | NM_009828    | 12428  |
| 0,521      | 0,369                   | 0,274                   | 0,222                   | 0,443                   | 0,432                   | NM_172301    | 268697 |
| -2,939     | 0,505                   | 0,520                   | 0,263                   | 0,483                   | 0,050                   | NM_016693    | 53608  |
| 1,303      | -0,015                  | 0,140                   | 0,375                   | 0,086                   | 0,015                   | NM_031396    | 83674  |
| -0,017     | 0,204                   | -0,458                  | 0,017                   | -0,231                  | -0,065                  | NM_028238    | 72433  |
| 0,489      | -0,176                  | 0,014                   | 0,437                   | 0,370                   | 0,421                   | NM_007633    | 12447  |
| 0,458      | -0,104                  | 0,024                   | 0,023                   | 0,068                   | 0,190                   | NM_001081117 | 17345  |
| -5,894     | -1,650                  | -1,980                  | -1,617                  | -2,899                  | -2,458                  | XM_001472091 |        |
| -5,212     | -1,314                  | -2,296                  | -3,040                  | -1,944                  | -1,653                  |              |        |
| -5,808     | -1,198                  | -2,637                  | -3,200                  | -2,271                  | -1,435                  |              |        |
| 0,151      | 0,291                   | 0,325                   | 0,231                   | 0,416                   | 0,233                   | NM_009860    | 12532  |
| 0,135      | 0,035                   | -0,015                  | -0,308                  | 0,059                   | 0,015                   | NM_007630    | 12442  |
| -5,994     | -1,237                  | -2,117                  | -3,417                  | -1,662                  | -1,510                  |              | 16061  |
| 1,090      | 0,020                   | -0,020                  | 0,510                   | 0,712                   | 0,260                   | NM_001033285 | 226751 |
| -2,059     | 0,208                   | -1,101                  | -0,894                  | -0,622                  | -0,497                  | NM_133871    | 99899  |
| 0,592      | 0,247                   | 0,215                   | 0,350                   | 0,356                   | 0,439                   | NM_007634    | 12449  |
| -0,175     | 0,108                   | 0,524                   | -0,029                  | 0,714                   | 0,464                   | NM_007633    | 12447  |
| 0,029      | 0,538                   | 0,543                   | -0,003                  | 0,626                   | 0,433                   | NM_172301    | 268697 |
| -1,262     | 0,195                   | -0,103                  | -0,876                  | -0,869                  | -0,701                  | NM_001122733 | 16590  |
| -6,528     | -0,354                  | -2,295                  | -2,828                  | -1,515                  | -1,254                  |              |        |
| -4,127     | -2,044                  | -1,977                  | -3,782                  | -0,951                  | -1,221                  |              |        |
| -5,938     | -1,395                  | -2,121                  | -2,865                  | -1,665                  | -1,516                  |              |        |
| -0,380     | 0,495                   | 0,165                   | -0,011                  | 0,613                   | 1,809                   | NM_009844    | 12478  |
| -3,321     | -0,749                  | -2,246                  | -3,728                  | -0,934                  | -2,147                  |              |        |
| 0,714      | 0,360                   | -0,036                  | -0,060                  | 0,114                   | -0,788                  | NM_001033285 | 226751 |
| -0,247     | 0,447                   | 0,467                   | -0,168                  | 0,447                   | 0,370                   | NM_016681    | 50883  |
| 0,041      | 0,326                   | -0,041                  | -0,233                  | 0,188                   | 0,270                   | NM_028222    | 72391  |

|        |        |        |        |        |        |              |        |
|--------|--------|--------|--------|--------|--------|--------------|--------|
| 0,560  | 0,168  | 0,260  | 0,286  | 0,414  | 0,481  | NM_026560    | 52276  |
| -1,360 | -0,626 | -0,675 | -0,139 | 0,206  | -1,344 | NM_139299    | 218624 |
| -0,373 | 0,416  | -0,595 | -1,074 | -0,786 | -0,507 | NM_001142959 | 229672 |
| -2,439 | -0,779 | -2,078 | -2,746 | -1,239 | -1,612 |              |        |
| -0,103 | 0,258  | 0,133  | -0,011 | 0,204  | -0,007 | NM_001085383 | 71790  |
| -4,742 | -1,145 | -1,943 | -1,712 | -1,312 | -1,210 |              |        |
| -1,022 | 0,846  | 1,063  | 0,272  | 0,990  | 0,623  | NM_178589    | 94185  |
| -5,181 | -1,501 | -1,994 | -2,609 | -1,827 | -1,163 |              |        |
| 0,539  | 0,466  | 0,461  | -0,522 | 0,476  | -0,227 | NM_001033285 | 226751 |
| -5,720 | -0,853 | -1,889 | -2,309 | -1,432 | -1,618 |              |        |
| 0,069  | 0,159  | 0,317  | 0,073  | 0,475  | 0,393  | NM_026560    | 52276  |
| -0,551 | -0,229 | -0,463 | 0,232  | -0,051 | 0,668  | NM_172050    | 217306 |
| -3,402 | -1,166 | -2,458 | -3,416 | -1,153 | -1,260 |              |        |
| -3,220 | -2,363 | -3,282 | -3,236 | -2,027 | -3,296 | NM_007721    | 12777  |
| 1,215  | 2,091  | 2,267  | 1,547  | 2,126  | 1,933  | NM_009452    | 22164  |
| -2,545 | 1,102  | 0,279  | -0,636 | -0,466 | 1,180  | NM_001077189 | 14130  |
| 0,645  | 0,074  | 0,178  | 0,343  | 0,516  | 0,513  | NM_026410    | 67849  |
| -2,623 | -0,123 | -0,630 | -1,255 | -1,795 | -0,843 | NM_009914    | 12771  |
| 0,212  | 0,332  | 0,338  | 0,024  | 0,229  | 0,238  | NM_023223    | 107995 |
| -4,463 | -1,286 | -1,621 | -2,185 | -1,167 | -1,456 |              |        |
| -3,513 | -1,664 | -2,216 | -2,311 | -1,527 | -1,326 |              |        |
| 0,036  | -0,036 | 0,189  | -0,107 | 0,242  | 0,247  | NM_025415    | 66197  |
| 0,301  | 0,067  | 0,363  | -0,152 | 0,423  | 0,431  | NM_013473    | 11752  |
| -1,934 | 0,721  | 0,638  | 0,644  | 0,198  | 0,622  | NM_007643    | 12491  |
| -0,616 | 0,994  | 0,865  | 0,020  | 0,130  | 0,455  | NM_001025602 | 17082  |
| -5,271 | -1,467 | -2,356 | -2,439 | -1,499 | -1,475 |              |        |
| 1,642  | 2,663  | 2,222  | 2,028  | 1,873  | 2,193  | NM_001111099 | 12575  |
| -5,120 | -1,572 | -2,330 | -2,549 | -1,987 | -1,148 |              |        |
| -1,495 | 0,146  | 0,129  | -0,614 | -0,367 | 0,152  | NM_022021    | 63955  |
| -5,724 | -1,372 | -2,095 | -3,140 | -1,894 | -1,869 |              |        |
| -2,218 | 1,571  | 0,634  | 0,125  | 0,491  | 1,314  |              | 15951  |
| -0,818 | 0,446  | 0,064  | -0,149 | -0,064 | 1,060  | NM_001042605 | 16149  |
| 0,283  | 0,011  | 0,140  | 0,153  | 0,311  | 0,383  | NM_016904    | 54124  |
| -2,686 | 0,378  | -0,287 | -1,088 | -0,881 | -0,806 | NM_010730    | 16952  |
| -0,519 | 3,099  | 2,177  | 0,986  | 1,404  | 1,954  | NM_013532    | 14728  |
| -1,984 | -1,010 | -1,520 | -1,550 | -1,440 | -0,047 |              | 12518  |
| 0,214  | 0,009  | 0,207  | 0,166  | 0,313  | 0,294  | NM_016904    | 54124  |
| -1,746 | 1,275  | 1,776  | 0,575  | 0,701  | 0,692  | NM_008362    | 16177  |



| SeqID   | ProbeID       | GeneName       |
|---------|---------------|----------------|
| 2276496 | A_51_P460954  | Ccl6           |
| 2268264 | A_51_P413866  | Cfb            |
| 2272748 | A_51_P509679  | Igh-VJ558      |
| 2272460 | A_55_P1960148 | AK007826       |
| 2284426 | A_55_P2214124 | Igh-VJ558      |
| 2309975 | A_51_P407657  | ENSMUST0000010 |
| 2264395 | A_66_P139367  | ENSMUST0000010 |
| 2261863 | A_55_P2094060 | Gzma           |
| 2276337 | A_55_P1998011 | Klra23         |
| 2266123 | A_55_P2038987 | Gas7           |
| 2262206 | A_55_P2186942 | ENSMUST0000010 |
| 2290842 | A_55_P1979147 | Klrb1c         |
| 2276883 | A_52_P157837  | ENSMUST0000010 |
| 2285927 | A_66_P105596  | LOC676193      |
| 2258389 | A_55_P2087429 | LOC100047162   |
| 2277494 | A_52_P165705  | Cd1d2          |
| 2271120 | A_52_P161488  | Clec4e         |
| 2288714 | A_51_P435671  | LOC631064      |
| 2271192 | A_55_P2071716 | Klre1          |
| 2287527 | A_52_P272778  | Klrk1          |
| 2269354 | A_55_P2077958 | Klra5          |
| 2288811 | A_55_P2139356 | LOC631518      |
| 2269908 | A_55_P1997997 | Klra23         |
| 2312019 | A_66_P114582  | ENSMUST0000010 |
| 2259450 | A_55_P2183369 | ENSMUST0000010 |
| 2309470 | A_51_P212782  | Il1b           |
| 2312288 | A_51_P130095  | Fcgr2b         |
| 2302264 | A_52_P265556  | ENSMUST0000010 |
| 2278988 | A_55_P2079579 | Pira7          |
| 2289563 | A_55_P1977451 | ENSMUST0000010 |
| 2284595 | A_51_P212754  | Tgfb1          |
| 2303935 | A_55_P2138386 | Il5            |
| 2287936 | A_55_P2004536 | Klra4          |
| 2281140 | A_55_P2135526 | Gzmc           |
| 2290409 | A_52_P538084  | ENSMUST0000010 |
| 2265811 | A_51_P414879  | ENSMUST0000010 |
| 2309485 | A_51_P123625  | Irg1           |
| 2306552 | A_51_P303424  | Itgax          |
| 2257024 | A_55_P2099742 | Ccl19          |
| 2264330 | A_55_P2075510 | ENSMUST0000010 |
| 2311735 | A_52_P502849  | ENSMUST0000010 |
| 2311641 | A_51_P367070  | Il9            |
| 2259452 | A_51_P301394  | Gspt2          |
| 2310444 | A_52_P765764  | ENSMUST0000010 |
| 2267512 | A_52_P212686  | Lrrk1          |
| 2304791 | A_55_P2133907 | ENSMUST0000010 |

2284193 A\_55\_P1988994 LOC100046350  
2308283 A\_55\_P2015363 C1ra  
2288477 A\_51\_P156274 Ltbr  
2261598 A\_55\_P1978033 ENSMUST0000010  
2279289 A\_66\_P102346 ENSMUST0000010  
2267713 A\_52\_P112190 LOC100047053  
2276126 A\_55\_P1979526 Cdkn2b  
2291815 A\_55\_P1966608 LOC640701  
2295954 A\_66\_P106497 ENSMUST0000010  
2276510 A\_55\_P2140286 ENSMUST0000010  
2276743 A\_51\_P154485 Fcrla  
2285899 A\_55\_P2058028 ENSMUST0000010  
2299955 A\_55\_P2187217 ENSMUST0000010  
2309508 A\_66\_P124806 Tlr4  
2286312 A\_55\_P2097279 Lilrb3  
2282902 A\_55\_P2186972 ENSMUST0000010  
2291515 A\_52\_P42245 Klrb1a  
2274816 A\_55\_P2011950 LOC435333  
2269728 A\_52\_P15405 Blk  
2287696 A\_55\_P2119377 Klri2  
2264476 A\_55\_P2103948 ENSMUST0000010  
2302088 A\_55\_P2068595 LOC100047095  
2261784 A\_52\_P614207 LOC100047222  
2281798 A\_55\_P2066578 Ifi204  
2260279 A\_55\_P2025586 ENSMUST0000010  
2276840 A\_52\_P408757 Fcgr3  
2263287 A\_51\_P322640 Ccl24  
2306096 A\_51\_P375146 Cd36  
2266536 A\_55\_P2058023 ENSMUST0000010  
2264295 A\_55\_P2187067 ENSMUST0000010  
2262142 A\_52\_P63973 ENSMUST0000010  
2287115 A\_55\_P2027731 Il1r1  
2291370 A\_55\_P2004526 Klra8  
2258950 A\_66\_P112234 LOC676175  
2285560 A\_55\_P2058040 ENSMUST0000010  
2297182 A\_66\_P133367 ENSMUST0000010  
2276960 A\_51\_P245989 Ccr2  
2301307 A\_55\_P1997756 Il6  
2265415 A\_52\_P186262 ENSMUST0000010  
2308625 A\_55\_P2051270 Tctex1d1  
2289471 A\_55\_P1979364 ENSMUST0000010  
2311225 A\_55\_P2186978 ENSMUST0000010  
2286864 A\_55\_P2062802 ENSMUST0000010  
2306362 A\_55\_P2130497 ENSMUST0000010  
2279875 A\_55\_P2003915 ENSMUST0000010  
2281868 A\_51\_P513776 LOC640979  
2260889 A\_55\_P1957459 Lilrb4  
2257552 A\_55\_P1962400 Il1m  
2300373 A\_55\_P2276221 Gm5222  
2290157 A\_51\_P288295 LOC677484  
2257556 A\_55\_P2155560 LOC630565  
2295024 A\_55\_P2060897 ENSMUST0000010  
2308773 A\_51\_P405638 LOC100045791  
2289484 A\_52\_P374653 ENSMUST0000010  
2265453 A\_51\_P500882 Ncr1  
2273411 A\_66\_P116173 Il23r

2295994 A\_51\_P241457 Lilrb4  
2299041 A\_52\_P630429 ENSMUST0000010  
2302866 A\_55\_P1974577 Nfam1  
2278427 A\_66\_P109731 ENSMUST0000010  
2270408 A\_52\_P546162 ENSMUST0000010  
2259200 A\_52\_P30641 ENSMUST0000010  
2309991 A\_55\_P2140348 Igh-VJ558  
2275786 A\_55\_P2008437 Cdkn2a  
2288305 A\_55\_P2079079 Cd19  
2289185 A\_55\_P2117342 ENSMUST0000010  
2286378 A\_52\_P578436 ENSMUST0000010  
2285307 A\_55\_P1988183 Cdkn2b  
2301163 A\_55\_P2003911 ENSMUST0000010  
2295039 A\_55\_P2026258 ENSMUST0000010  
2271312 A\_52\_P15966 ENSMUST0000010  
2273241 A\_55\_P2199202 Il22  
2298904 A\_51\_P150710 Igj  
2307634 A\_55\_P2167347 ENSMUST0000010  
2297923 A\_55\_P2180839 Il13  
2291437 A\_66\_P140474 LOC100047316  
2311645 A\_55\_P2094104 LOC100047070  
2305911 A\_55\_P1987406 ENSMUST0000010  
2287230 A\_66\_P113466 ENSMUST0000010  
2270417 A\_55\_P2057283 ENSMUST0000010  
2295017 A\_51\_P461665 Cxcl9  
2258981 A\_66\_P127412 ENSMUST0000010  
2260024 A\_55\_P2029319 Cd70  
2285366 A\_55\_P1978994 ENSMUST0000010  
2283726 A\_52\_P232813 Cxcl3  
2267745 A\_55\_P2004541 Klra7  
2279870 A\_55\_P2098697 Tnfaip2  
2303775 A\_55\_P2036693 Cd40  
2261055 A\_55\_P2030299 LOC544904  
2272642 A\_55\_P2004527 Klra8  
2302806 A\_55\_P2134277 Igh-2  
2264069 A\_55\_P2145224 ENSMUST0000010  
2272896 A\_55\_P1974014 LOC100046496  
2307552 A\_51\_P117581 Cables1  
2301716 A\_55\_P2087622 Il4i1  
2261533 A\_51\_P114462 Ccl17  
2278204 A\_55\_P1985985 Il3  
2270460 A\_51\_P185660 Ccl9  
2261676 A\_51\_P520966 Icosl  
2270800 A\_51\_P242930 Lat2  
2282732 A\_55\_P1971174 Cd1d2  
2271993 A\_51\_P390937 LOC675735  
2279139 A\_55\_P2065510 ENSMUST0000010  
2298039 A\_51\_P470079 Il1r2  
2268109 A\_55\_P2214531 Il9r  
2303110 A\_52\_P68893 Ifng  
2260776 A\_66\_P134171 ENSMUST0000010  
2301510 A\_51\_P500090 Klra7  
2305866 A\_51\_P333274 Gzmb  
2309745 A\_52\_P638459 Ccl5  
2310147 A\_51\_P284608 Cd74  
2293209 A\_51\_P327796 Itgb5

2276850 A\_51\_P104768 Gm16697  
2264647 A\_55\_P1959421 ENSMUST0000010  
2297153 A\_55\_P2016462 Cxcl10  
2272049 A\_51\_P109570 Klrb1b  
2291885 A\_55\_P1977038 Cxcl9  
2271948 A\_55\_P1964325 Klrb1b  
2290350 A\_51\_P205334 Tnfrsf8  
2261417 A\_55\_P1999033 LOC100046275  
2277497 A\_51\_P405476 Fcer1g  
2311424 A\_55\_P2067620 ENSMUST0000010  
2288611 A\_51\_P196925 Cx3cl1  
2262297 A\_66\_P120987 Cd79a  
2260255 A\_52\_P99888 Cxcl16  
2275538 A\_51\_P346668 Ifi5  
2286550 A\_55\_P1975560 Ifi204  
2305609 A\_51\_P342652 Cd79b  
2278627 A\_55\_P2032718 Klra9  
2282597 A\_55\_P2132532 ENSMUST0000010  
2294364 A\_55\_P2009375 Cdk18  
2296320 A\_55\_P2004652 Klrc1  
2288151 A\_55\_P2081164 Cd300lf  
2294087 A\_55\_P2117614 Tnfrsf13c  
2275179 A\_51\_P150302 Crtam  
2279835 A\_51\_P271503 Il1r1  
2264890 A\_55\_P2129047 Tlr7  
2306283 A\_55\_P2137496 LOC100047815  
2296282 A\_55\_P1970755 Hdac9  
2306440 A\_55\_P2106121 Il21  
2260286 A\_55\_P2014427 Il17re  
2301794 A\_55\_P1992592 Il5ra  
2309812 A\_51\_P234956 Xcl1  
2305468 A\_55\_P2132533 ENSMUST0000010  
2284569 A\_52\_P517098 Il18rap  
2298628 A\_55\_P2157829 ENSMUST0000010  
2299483 A\_55\_P2100475 Gas2l3  
2302450 A\_55\_P2063755 Naip6  
2289283 A\_51\_P378298 Faim3  
2307398 A\_55\_P1984168 Casp4  
2262852 A\_55\_P2027737 Il1r1  
2308900 A\_51\_P237865 Il4

| Description                                                                                                          | ANOVA p-value |
|----------------------------------------------------------------------------------------------------------------------|---------------|
| Mus musculus chemokine (C-C motif) ligand 6 (Ccl6), mRNA [NM_009139]                                                 | 3,92E-04      |
| Mus musculus complement factor B (Cfb), transcript variant 1, mRNA [NM_008191]                                       | 3,12E-04      |
| PREDICTED: Mus musculus immunoglobulin heavy chain (J558 family) (Igh-VJ558)                                         | 1,11E-16      |
| PREDICTED: Mus musculus immunoglobulin heavy chain (J558 family) (Igh-VJ558)                                         | 4,37E-17      |
| Mus musculus immunoglobulin heavy chain complex, mRNA (cDNA clone MGC:30000)                                         | 1,89E-14      |
| immunoglobulin kappa chain variable 19-93 [Source:MGI Symbol;Acc:MGI:1076140]                                        | 3,95E-09      |
| immunoglobulin heavy variable V12-3 [Source:MGI Symbol;Acc:MGI:3646760] [ENSGM00000100000]                           | 6,44E-04      |
| Mus musculus granzyme A (Gzma), mRNA [NM_010370]                                                                     | 6,70E-04      |
| Mus musculus killer cell lectin-like receptor subfamily A, member 23 (Klra23), mRNA [NM_008191]                      | 1,05E-03      |
| Mus musculus growth arrest specific 7 (Gas7), transcript variant 2, mRNA [NM_008191]                                 | 2,27E-06      |
| immunoglobulin kappa variable 10-94 [Source:MGI Symbol;Acc:MGI:3646140] [ENSGM00000100000]                           | 7,44E-08      |
| Mus musculus killer cell lectin-like receptor subfamily B member 1C (Klrb1c), transcript variant 1, mRNA [NM_008191] | 2,72E-12      |
| immunoglobulin kappa variable 3-9 [Source:MGI Symbol;Acc:MGI:1330856] [ENSGM00000100000]                             | 9,43E-07      |
| immunoglobulin kappa variable 3-12 [Source:MGI Symbol;Acc:MGI:1330815] [ENSGM00000100000]                            | 3,96E-08      |
| immunoglobulin kappa variable 6-15 [Source:MGI Symbol;Acc:MGI:1330831] [ENSGM00000100000]                            | 1,17E-10      |
| Mus musculus CD1d2 antigen (Cd1d2), mRNA [NM_007640]                                                                 | 7,44E-10      |
| Mus musculus C-type lectin domain family 4, member e (Clec4e), mRNA [NM_019191]                                      | 1,80E-02      |
| M.musculus mRNA for C2-Fcgamma fusion protein [X96776]                                                               | 2,56E-10      |
| Mus musculus killer cell lectin-like receptor family E member 1 (Klre1), mRNA [NM_008191]                            | 1,50E-08      |
| Mus musculus killer cell lectin-like receptor subfamily K, member 1 (Klrk1), transcript variant 1, mRNA [NM_008191]  | 1,47E-08      |
| Mus musculus killer cell lectin-like receptor, subfamily A, member 5 (Klra5), mRNA [NM_008191]                       | 3,56E-03      |
| M.musculus immunoglobulin VDJ region (A8H). [X80960]                                                                 | 1,42E-08      |
| Mus musculus killer cell lectin-like receptor subfamily A, member 23 (Klra23), mRNA [NM_008191]                      | 8,35E-03      |
| immunoglobulin heavy variable V1-54 [Source:MGI Symbol;Acc:MGI:3647133] [ENSGM00000100000]                           | 4,61E-07      |
| immunoglobulin kappa variable 3-4 [Source:MGI Symbol;Acc:MGI:1330855] [ENSGM00000100000]                             | 4,63E-08      |
| Mus musculus interleukin 1 beta (Il1b), mRNA [NM_008361]                                                             | 2,60E-03      |
| Mus musculus Fc receptor, IgG, low affinity IIb (Fcgr2b), transcript variant 1, mRNA [NM_008191]                     | 2,71E-07      |
| immunoglobulin kappa chain variable 4-91 [Source:MGI Symbol;Acc:MGI:3642270] [ENSGM00000100000]                      | 1,82E-09      |
| Mus musculus paired-Ig-like receptor A7 (Pira7), mRNA [NM_011094]                                                    | 1,46E-04      |
| immunoglobulin kappa variable 4-80 [Source:MGI Symbol;Acc:MGI:4439653] [ENSGM00000100000]                            | 7,78E-13      |
| Mus musculus transforming growth factor, beta induced (Tgfb), mRNA [NM_009319]                                       | 4,72E-04      |
| Mus musculus interleukin 5 (Il5), mRNA [NM_010558]                                                                   | 1,71E-08      |
| Mus musculus killer cell lectin-like receptor, subfamily A, member 4 (Klra4), transcript variant 1, mRNA [NM_008191] | 1,00E-03      |
| Mus musculus granzyme C (Gzmc), mRNA [NM_010371]                                                                     | 7,89E-06      |
| immunoglobulin kappa variable 1-135 [Source:MGI Symbol;Acc:MGI:3819952] [ENSGM00000100000]                           | 1,99E-08      |
| immunoglobulin kappa variable 1-133 [Source:MGI Symbol;Acc:MGI:3648380] [ENSGM00000100000]                           | 1,33E-11      |
| Mus musculus immunoresponsive gene 1 (Irg1), mRNA [NM_008392]                                                        | 1,27E-09      |
| Mus musculus integrin alpha X (Itgax), mRNA [NM_021334]                                                              | 8,42E-05      |
| Mus musculus chemokine (C-C motif) ligand 19 (Ccl19), mRNA [NM_011888]                                               | 5,22E-03      |
| immunoglobulin heavy variable V1-23 [Source:MGI Symbol;Acc:MGI:3815050] [ENSGM00000100000]                           | 6,33E-10      |
| immunoglobulin kappa variable 3-4 [Source:MGI Symbol;Acc:MGI:1330855] [ENSGM00000100000]                             | 2,24E-05      |
| Mus musculus interleukin 9 (Il9), mRNA [NM_008373]                                                                   | 4,74E-12      |
| Mus musculus G1 to S phase transition 2 (Gspt2), mRNA [NM_008179]                                                    | 7,38E-03      |
| immunoglobulin kappa variable 1-132 [Source:MGI Symbol;Acc:MGI:3648800] [ENSGM00000100000]                           | 8,05E-12      |
| Mus musculus leucine-rich repeat kinase 1 (Lrrk1), mRNA [NM_146191]                                                  | 1,38E-04      |
| immunoglobulin heavy variable V8-5 [Source:MGI Symbol;Acc:MGI:3645478] [ENSGM00000100000]                            | 8,29E-08      |

|                                                                                       |                 |
|---------------------------------------------------------------------------------------|-----------------|
| immunoglobulin kappa chain variable 1-122 [Source:MGI Symbol;Acc:MGI:44397            | <b>2,24E-11</b> |
| Mus musculus complement component 1, r subcomponent A (C1ra), mRNA [NM_               | <b>2,64E-05</b> |
| Mus musculus lymphotoxin B receptor (Ltbr), mRNA [NM_010736]                          | <b>7,13E-05</b> |
| immunoglobulin kappa variable 3-10 [Source:MGI Symbol;Acc:MGI:1330821] [EN            | <b>1,95E-06</b> |
| immunoglobulin kappa variable 1-110 [Source:MGI Symbol;Acc:MGI:4439558] [E            | <b>1,46E-10</b> |
| immunoglobulin kappa variable 6-32 [Source:MGI Symbol;Acc:MGI:3641634] [EN            | <b>7,97E-11</b> |
| Mus musculus cyclin-dependent kinase inhibitor 2B (p15, inhibits CDK4) (Cdkn2b        | <b>5,27E-03</b> |
| PREDICTED: Mus musculus similar to immunoglobulin mu-chain-like (LOC100505            | <b>4,84E-11</b> |
| immunoglobulin kappa chain variable 8-30 [Source:MGI Symbol;Acc:MGI:364225            | <b>3,68E-11</b> |
| immunoglobulin kappa variable 1-131 [Source:MGI Symbol;Acc:MGI:3645551] [E            | <b>1,90E-11</b> |
| Mus musculus Fc receptor-like A (Fcrla), transcript variant 2, mRNA [NM_145141]       | <b>3,68E-08</b> |
| immunoglobulin kappa variable 4-63 [Source:MGI Symbol;Acc:MGI:3645235] [EN            | <b>5,78E-12</b> |
| immunoglobulin heavy variable V1-42 [Source:MGI Symbol;Acc:MGI:3704123] [E            | <b>4,88E-09</b> |
| Mus musculus toll-like receptor 4 (Tlr4), mRNA [NM_021297]                            | <b>3,71E-03</b> |
| Mus musculus leukocyte immunoglobulin-like receptor, subfamily B (with TM and         | <b>5,65E-04</b> |
| Mus musculus immunoglobulin kappa light chain, variable region mRNA, clone BA         | <b>2,07E-10</b> |
| Mus musculus killer cell lectin-like receptor subfamily B member 1A (Klr1a), trans    | <b>1,21E-10</b> |
| immunoglobulin heavy variable 1-85 [Source:MGI Symbol;Acc:MGI:3645723] [EN            | <b>3,78E-11</b> |
| Mus musculus B lymphoid kinase (Blk), mRNA [NM_007549]                                | <b>8,13E-07</b> |
| Mus musculus killer cell lectin-like receptor family I member 2 (Klri2), mRNA [NM_1   | <b>3,38E-05</b> |
| immunoglobulin kappa variable 4-53 [Source:MGI Symbol;Acc:MGI:2686266] [EN            | <b>1,21E-11</b> |
| Mus musculus predicted gene, 18756 (Gm18756), transcript variant 2, non-codin         | <b>1,39E-02</b> |
| immunoglobulin kappa variable 3-7 [Source:MGI Symbol;Acc:MGI:1330852] [ENS            | <b>1,02E-06</b> |
| Mus musculus interferon activated gene 204, mRNA (cDNA clone MGC:18551 IM             | <b>4,84E-04</b> |
| immunoglobulin heavy variable V3-8 [Source:MGI Symbol;Acc:MGI:3645298] [EN            | <b>5,42E-09</b> |
| Mus musculus Fc receptor, IgG, low affinity III (Fcgr3), mRNA [NM_010188]             | <b>2,89E-04</b> |
| Mus musculus chemokine (C-C motif) ligand 24 (Ccl24), mRNA [NM_019577]                | <b>6,50E-14</b> |
| Mus musculus CD36 antigen (Cd36), transcript variant 2, mRNA [NM_007643]              | <b>5,05E-05</b> |
| immunoglobulin kappa variable 4-57-1 [Source:MGI Symbol;Acc:MGI:2686264] [I           | <b>1,55E-12</b> |
| immunoglobulin kappa variable 1-117 [Source:MGI Symbol;Acc:MGI:4439721] [E            | <b>2,38E-11</b> |
| immunoglobulin kappa chain variable 1-35 [Source:MGI Symbol;Acc:MGI:443961            | <b>3,20E-10</b> |
| Mus musculus interleukin 1 receptor-like 1 (Il1rl1), transcript variant 1, mRNA [NM]  | <b>4,30E-03</b> |
| Mus musculus killer cell lectin-like receptor, subfamily A, member 8 (Klra8), transcr | <b>1,08E-03</b> |
| Mus musculus isolate C5-12 anti-GBM immunoglobulin kappa chain variable regio         | <b>3,80E-07</b> |
| immunoglobulin kappa variable 4-73 [Source:MGI Symbol;Acc:MGI:3645825] [EN            | <b>4,44E-12</b> |
| immunoglobulin kappa chain variable 8-27 [Source:MGI Symbol;Acc:MGI:443986            | <b>4,21E-08</b> |
| Mus musculus chemokine (C-C motif) receptor 2 (Ccr2), mRNA [NM_009915]                | <b>1,01E-11</b> |
| Mus musculus interleukin 6 (Il6), mRNA [NM_031168]                                    | <b>2,48E-05</b> |
| immunoglobulin kappa chain variable 6-25 [Source:MGI Symbol;Acc:MGI:443986            | <b>2,00E-13</b> |
| Mus musculus Tctex1 domain containing 1 (Tctex1d1), transcript variant 1, mRNA        | <b>1,52E-03</b> |
| immunoglobulin heavy variable 1-83 [Source:MGI Symbol;Acc:MGI:3648939] [EN            | <b>4,72E-09</b> |
| immunoglobulin kappa variable 4-78 [Source:MGI Symbol;Acc:MGI:3819775] [EN            | <b>5,90E-13</b> |
| Mus musculus partial mRNA for immunoglobulin kappa light chain variable region        | <b>2,57E-10</b> |
| immunoglobulin heavy variable V1-67 [Source:MGI Symbol;Acc:MGI:3645228] [E            | <b>1,13E-12</b> |
| immunoglobulin kappa variable 6-13 [Source:MGI Symbol;Acc:MGI:1330829] [EN            | <b>1,04E-09</b> |
| Immunoglobulin heavy chain V gene segment [Source:IMG/GENE-DB;Acc:IGHV                | <b>2,08E-12</b> |
| Mus musculus leukocyte immunoglobulin-like receptor, subfamily B, member 4 (Li        | <b>3,42E-06</b> |
| Mus musculus interleukin 1 receptor antagonist (Il1rn), transcript variant 2, mRNA    | <b>1,73E-09</b> |
| immunoglobulin kappa variable 17-121 [Source:MGI Symbol;Acc:MGI:3647671] [I           | <b>7,90E-10</b> |
| immunoglobulin heavy variable V1-7 [Source:MGI Symbol;Acc:MGI:3704122] [EN            | <b>3,01E-12</b> |
| immunoglobulin heavy variable V1-5 [Source:MGI Symbol;Acc:MGI:3704121] [EN            | <b>2,05E-10</b> |
| immunoglobulin kappa constant [Source:MGI Symbol;Acc:MGI:96495] [ENSMUS               | <b>1,24E-12</b> |
| immunoglobulin heavy variable V9-3 [Source:MGI Symbol;Acc:MGI:3642720] [EN            | <b>2,79E-08</b> |
| immunoglobulin kappa variable 3-10 [Source:MGI Symbol;Acc:MGI:1330821] [EN            | <b>1,89E-05</b> |
| Mus musculus natural cytotoxicity triggering receptor 1 (Ncr1), mRNA [NM_01074        | <b>3,16E-05</b> |
| Mus musculus interleukin 23 receptor (Il23r), mRNA [NM_144548]                        | <b>1,01E-05</b> |

|                                                                                                                         |          |
|-------------------------------------------------------------------------------------------------------------------------|----------|
| Mus musculus leukocyte immunoglobulin-like receptor, subfamily B, member 4 (Lilrb4), mRNA [NM_010213]                   | 9,57E-07 |
| immunoglobulin kappa variable 2-116 [Source:MGI Symbol;Acc:MGI:3647785] [ENSMUSE00000102131]                            | 2,86E-11 |
| Mus musculus Nfat activating molecule with ITAM motif 1 (Nfam1), mRNA [NM_021241]                                       | 2,47E-09 |
| immunoglobulin kappa chain variable 9-124 [Source:MGI Symbol;Acc:MGI:364683] [ENSMUSE00000102131]                       | 1,38E-07 |
| immunoglobulin kappa variable 4-58 [Source:MGI Symbol;Acc:MGI:2685923] [ENSMUSE00000102131]                             | 2,53E-13 |
| immunoglobulin kappa variable 4-86 [Source:MGI Symbol;Acc:MGI:2685305] [ENSMUSE00000102131]                             | 5,59E-10 |
| Mus musculus immunoglobulin heavy chain complex, mRNA (cDNA clone MGC:118354), transcript variant 1                     | 9,82E-10 |
| Mus musculus cyclin-dependent kinase inhibitor 2A (Cdkn2a), transcript variant 1                                        | 7,68E-07 |
| Mus musculus CD19 antigen (Cd19), mRNA [NM_009844]                                                                      | 3,47E-04 |
| immunoglobulin kappa variable 2-116 [Source:MGI Symbol;Acc:MGI:3647785] [ENSMUSE00000102131]                            | 1,28E-11 |
| immunoglobulin kappa chain variable 4-71 [Source:MGI Symbol;Acc:MGI:443965] [ENSMUSE00000102131]                        | 8,21E-13 |
| Mus musculus cyclin-dependent kinase inhibitor 2B (p15, inhibits CDK4) (Cdkn2b), mRNA [NM_009843]                       | 4,35E-06 |
| immunoglobulin kappa variable 6-17 [Source:MGI Symbol;Acc:MGI:1330833] [ENSMUSE00000102131]                             | 7,25E-11 |
| immunoglobulin kappa variable 12-46 [Source:MGI Symbol;Acc:MGI:4439773] [ENSMUSE00000102131]                            | 6,58E-08 |
| immunoglobulin heavy variable 1-84 [Source:MGI Symbol;Acc:MGI:3644235] [ENSMUSE00000102131]                             | 7,02E-10 |
| Mus musculus interleukin 22 (Il22), mRNA [NM_016971]                                                                    | 5,61E-07 |
| Mus musculus immunoglobulin joining chain (Igj), mRNA [NM_152839]                                                       | 5,03E-14 |
| immunoglobulin kappa variable 14-126 [Source:MGI Symbol;Acc:MGI:3643131] [ENSMUSE00000102131]                           | 4,32E-07 |
| Mus musculus interleukin 13 (Il13), mRNA [NM_008355]                                                                    | 3,08E-14 |
| immunoglobulin kappa chain variable 4-70 [Source:MGI Symbol;Acc:MGI:268634] [ENSMUSE00000102131]                        | 6,13E-13 |
| immunoglobulin kappa variable 8-28 [Source:MGI Symbol;Acc:MGI:3642251] [ENSMUSE00000102131]                             | 3,50E-10 |
| immunoglobulin lambda variable 1 [Source:MGI Symbol;Acc:MGI:96530] [ENSMUSE00000102131]                                 | 1,02E-11 |
| immunoglobulin kappa chain variable 4-90 [Source:MGI Symbol;Acc:MGI:443983] [ENSMUSE00000102131]                        | 3,12E-10 |
| immunoglobulin lambda constant 2 [Source:MGI Symbol;Acc:MGI:99547] [ENSMUSE00000102131]                                 | 3,54E-11 |
| Mus musculus chemokine (C-X-C motif) ligand 9 (Cxcl9), mRNA [NM_008599]                                                 | 9,38E-12 |
| immunoglobulin heavy variable V11-2 [Source:MGI Symbol;Acc:MGI:4947968] [ENSMUSE00000102131]                            | 8,84E-07 |
| Mus musculus CD70 antigen (Cd70), mRNA [NM_011617]                                                                      | 4,43E-09 |
| immunoglobulin heavy variable V9-2 [Source:MGI Symbol;Acc:MGI:3643816] [ENSMUSE00000102131]                             | 1,38E-07 |
| Mus musculus chemokine (C-X-C motif) ligand 3 (Cxcl3), mRNA [NM_203320]                                                 | 1,25E-07 |
| Mus musculus killer cell lectin-like receptor, subfamily A, member 7 (Klra7), transcript variant 1                      | 7,44E-03 |
| Mus musculus tumor necrosis factor, alpha-induced protein 2 (Tnfaip2), mRNA [NM_010214]                                 | 1,85E-07 |
| Mus musculus CD40 antigen (Cd40), transcript variant 1, mRNA [NM_011611]                                                | 7,96E-08 |
| immunoglobulin heavy variable V14-3 [Source:MGI Symbol;Acc:MGI:4439764] [ENSMUSE00000102131]                            | 1,50E-11 |
| Mus musculus killer cell lectin-like receptor, subfamily A, member 8 (Klra8), transcript variant 1                      | 1,03E-03 |
| immunoglobulin heavy variable V1-18 [Source:MGI Symbol;Acc:MGI:4439780] [ENSMUSE00000102131]                            | 9,41E-10 |
| immunoglobulin lambda constant 3 [Source:MGI Symbol;Acc:MGI:99886] [ENSMUSE00000102131]                                 | 3,06E-11 |
| immunoglobulin kappa variable 2-109 [Source:MGI Symbol;Acc:MGI:3642626] [ENSMUSE00000102131]                            | 2,07E-10 |
| Mus musculus CDK5 and Abl enzyme substrate 1 (Cables1), transcript variant 2, mRNA [NM_010215]                          | 1,45E-09 |
| Mus musculus interleukin 4 induced 1 (Il4i1), mRNA [NM_010215]                                                          | 2,05E-10 |
| Mus musculus chemokine (C-C motif) ligand 17 (Ccl17), mRNA [NM_011332]                                                  | 3,43E-11 |
| Mus musculus interleukin 3 (Il3), mRNA [NM_010556]                                                                      | 6,10E-10 |
| Mus musculus chemokine (C-C motif) ligand 9 (Ccl9), mRNA [NM_011338]                                                    | 3,27E-03 |
| Mus musculus icos ligand (Icosl), mRNA [NM_015790]                                                                      | 3,57E-13 |
| Mus musculus linker for activation of T cells family, member 2 (Lat2), transcript variant 1                             | 1,04E-03 |
| Mus musculus CD1d2 antigen (Cd1d2), mRNA [NM_007640]                                                                    | 1,20E-10 |
| immunoglobulin kappa variable 14-111 [Source:MGI Symbol;Acc:MGI:4439863] [ENSMUSE00000102131]                           | 3,41E-10 |
| immunoglobulin heavy variable V1-20 [Source:MGI Symbol;Acc:MGI:3644607] [ENSMUSE00000102131]                            | 4,55E-11 |
| Mus musculus interleukin 1 receptor, type II (Il1r2), mRNA [NM_010555]                                                  | 8,06E-08 |
| Mus musculus interleukin 9 receptor (Il9r), transcript variant 1, mRNA [NM_001133]                                      | 2,32E-06 |
| Mus musculus interferon gamma (Ifng), mRNA [NM_008337]                                                                  | 2,69E-04 |
| immunoglobulin kappa chain variable 8-24 [Source:MGI Symbol;Acc:MGI:494795] [ENSMUSE00000102131]                        | 1,56E-10 |
| Mus musculus killer cell lectin-like receptor, subfamily A, member 7 (Klra7), transcript variant 1                      | 1,20E-02 |
| Mus musculus granzyme B (Gzmb), mRNA [NM_013542]                                                                        | 4,84E-09 |
| Mus musculus chemokine (C-C motif) ligand 5 (Ccl5), mRNA [NM_013653]                                                    | 8,56E-13 |
| Mus musculus CD74 antigen (invariant polypeptide of major histocompatibility complex class II) (Cd74), mRNA [NM_010213] | 7,57E-07 |
| Mus musculus integrin beta 5 (Itgb5), transcript variant 2, mRNA [NM_010580]                                            | 2,23E-08 |

|                                                                                                                         |          |
|-------------------------------------------------------------------------------------------------------------------------|----------|
| Immunoglobulin heavy chain V gene segment [Source:IMGT/GENE-DB;Acc:IGHV1-1]                                             | 3,11E-07 |
| immunoglobulin kappa chain variable 6-29 [Source:MGI Symbol;Acc:MGI:443961]                                             | 5,81E-09 |
| Mus musculus chemokine (C-X-C motif) ligand 10 (Cxcl10), mRNA [NM_021274]                                               | 2,83E-06 |
| Mus musculus killer cell lectin-like receptor subfamily B member 1B (Klrb1b), mRNA [NM_008599]                          | 2,55E-04 |
| Mus musculus chemokine (C-X-C motif) ligand 9 (Cxcl9), mRNA [NM_008599]                                                 | 4,55E-11 |
| Mus musculus killer cell lectin-like receptor subfamily B member 1B (Klrb1b), mRNA [NM_008599]                          | 8,94E-06 |
| Mus musculus tumor necrosis factor receptor superfamily, member 8 (Tnfrsf8), mRNA [NM_008599]                           | 1,11E-09 |
| immunoglobulin heavy variable V8-12 [Source:MGI Symbol;Acc:MGI:3642873] [ENSMUST000001000001]                           | 1,11E-07 |
| Mus musculus Fc receptor, IgE, high affinity I, gamma polypeptide (Fcer1g), mRNA [NM_008599]                            | 2,78E-04 |
| immunoglobulin kappa chain variable 2-137 [Source:MGI Symbol;Acc:MGI:443961]                                            | 6,92E-08 |
| Mus musculus chemokine (C-X3-C motif) ligand 1 (Cx3cl1), mRNA [NM_009142]                                               | 4,44E-05 |
| Mus musculus CD79A antigen (immunoglobulin-associated alpha) (Cd79a), mRNA [NM_008599]                                  | 1,50E-07 |
| Mus musculus chemokine (C-X-C motif) ligand 16 (Cxcl16), mRNA [NM_023158]                                               | 7,75E-04 |
| Mus musculus interferon regulatory factor 5 (Irf5), transcript variant 2, mRNA [NM_008599]                              | 5,45E-05 |
| Mus musculus interferon activated gene 204 (Ifi204), mRNA [NM_008329]                                                   | 1,13E-10 |
| Mus musculus CD79B antigen (Cd79b), mRNA [NM_008339]                                                                    | 6,00E-09 |
| Mus musculus killer cell lectin-like receptor subfamily A, member 9 (Klra9), mRNA [NM_008599]                           | 5,09E-03 |
| immunoglobulin kappa chain variable 15-103 [Source:MGI Symbol;Acc:MGI:9651]                                             | 2,42E-09 |
| Mus musculus cyclin-dependent kinase 18 (Cdk18), mRNA [NM_008795]                                                       | 1,60E-03 |
| Mus musculus killer cell lectin-like receptor subfamily C, member 1 (Klrc1), transcript variant 1, mRNA [NM_008599]     | 3,44E-04 |
| Mus musculus CD300 antigen like family member F (Cd300lf), transcript variant 1, mRNA [NM_008599]                       | 5,45E-03 |
| Mus musculus tumor necrosis factor receptor superfamily, member 13c (Tnfrsf13c), transcript variant 1, mRNA [NM_008599] | 1,50E-04 |
| Mus musculus cytotoxic and regulatory T cell molecule (Crtam), mRNA [NM_019400]                                         | 4,03E-09 |
| Mus musculus interleukin 1 receptor, type I (Il1r1), transcript variant 1, mRNA [NM_008599]                             | 2,03E-05 |
| Mus musculus toll-like receptor 7 (Tlr7), mRNA [NM_133211]                                                              | 3,01E-10 |
| Mus musculus CD79A antigen (immunoglobulin-associated alpha), mRNA (cDNA) [NM_008599]                                   | 1,06E-08 |
| Mus musculus histone deacetylase 9 (Hdac9), mRNA [NM_024124]                                                            | 1,57E-06 |
| Mus musculus interleukin 21 (Il21), mRNA [NM_021782]                                                                    | 7,52E-07 |
| Mus musculus interleukin 17 receptor E (Il17re), transcript variant 3, mRNA [NM_008599]                                 | 1,59E-08 |
| Mus musculus interleukin 5 receptor, alpha (Il5ra), mRNA [NM_008370]                                                    | 1,42E-02 |
| Mus musculus chemokine (C motif) ligand 1 (Xcl1), mRNA [NM_008510]                                                      | 1,30E-03 |
| immunoglobulin kappa chain variable 15-103 [Source:MGI Symbol;Acc:MGI:9651]                                             | 1,40E-09 |
| Mus musculus interleukin 18 receptor accessory protein (Il18rap), mRNA [NM_010000]                                      | 1,47E-07 |
| chemokine (C-C motif) ligand 1 [Source:MGI Symbol;Acc:MGI:98258] [ENSMUST000001000001]                                  | 8,64E-13 |
| Mus musculus growth arrest-specific 2 like 3 (Gas2l3), transcript variant 2, mRNA [NM_008599]                           | 8,20E-07 |
| Mus musculus NLR family, apoptosis inhibitory protein 6 (Naip6), mRNA [NM_010000]                                       | 5,25E-10 |
| Mus musculus Fas apoptotic inhibitory molecule 3 (Faim3), mRNA [NM_026976]                                              | 1,75E-09 |
| Mus musculus caspase 4, apoptosis-related cysteine peptidase (Casp4), mRNA [NM_008599]                                  | 1,62E-08 |
| Mus musculus interleukin 1 receptor-like 1 (Il1rl1), transcript variant 1, mRNA [NM_008599]                             | 4,12E-04 |
| Mus musculus interleukin 4 (Il4), mRNA [NM_021283]                                                                      | 7,07E-12 |



| Adjusted ANOVA p-value | Tukey p-value | Fold change | Log2 ratio | Median | wt_non-stim_1 | wt_non-stim_2 | wt_non-stim_3 | wt_non-stim_4 | wt_non-stim_21 |
|------------------------|---------------|-------------|------------|--------|---------------|---------------|---------------|---------------|----------------|
| 1,28E-03               | 1,05E-03      | 20,620      | 4,366      | 6,389  | -0,298        | -0,600        | -1,745        | -0,461        | 3,048          |
| 1,04E-03               | 7,90E-03      | 14,291      | 3,837      | 3,183  | -1,075        | -1,129        | -1,137        | -0,984        | -1,134         |
| 3,47E-14               | 4,90E-10      | 13,929      | 3,800      | 14,844 | 2,474         | 1,498         | 2,306         | 2,205         | 2,251          |
| 1,94E-14               | 7,47E-10      | 12,702      | 3,667      | 14,047 | 2,644         | 1,617         | 2,475         | 2,367         | 2,430          |
| 1,36E-12               | 5,05E-07      | 11,424      | 3,514      | 10,262 | 3,018         | 1,568         | 2,828         | 2,732         | 2,669          |
| 3,54E-08               | 1,09E-02      | 10,808      | 3,434      | 9,436  | 1,654         | 1,455         | 2,844         | 1,827         | 0,890          |
| 2,04E-03               | 3,80E-02      | 10,418      | 3,381      | 5,908  | -0,295        | -0,562        | 4,328         | 0,321         | 0,860          |
| 2,11E-03               | 3,08E-03      | 9,448       | 3,240      | 10,766 | -1,262        | -0,978        | -1,422        | -1,262        | 2,422          |
| 3,19E-03               | 1,30E-03      | 9,057       | 3,179      | 4,685  | -1,067        | -1,043        | -0,546        | -0,735        | 2,239          |
| 1,11E-05               | 1,66E-05      | 8,877       | 3,150      | 4,763  | -0,555        | -0,693        | -0,083        | -0,588        | 0,710          |
| 4,93E-07               | 2,29E-03      | 8,766       | 3,132      | 8,507  | 0,612         | 0,255         | 1,575         | 0,578         | 1,555          |
| 6,87E-11               | 8,66E-06      | 8,682       | 3,118      | 9,508  | 2,156         | 2,317         | 2,076         | 1,725         | 1,877          |
| 4,97E-06               | 1,09E-02      | 8,282       | 3,050      | 5,732  | 2,059         | 0,078         | 1,207         | 1,550         | 1,056          |
| 2,77E-07               | 2,07E-03      | 8,140       | 3,025      | 8,850  | 1,003         | 0,747         | 1,895         | 1,048         | 0,294          |
| 1,63E-09               | 2,23E-04      | 7,912       | 2,984      | 9,445  | 1,843         | 1,167         | 1,892         | 1,830         | 0,853          |
| 8,13E-09               | 8,66E-06      | 7,121       | 2,832      | 4,036  | -0,812        | -2,069        | -0,196        | -2,017        | -1,611         |
| 4,30E-02               | 1,66E-02      | 6,845       | 2,775      | 2,606  | -0,808        | -0,167        | 0,072         | 0,083         | -0,072         |
| 3,21E-09               | 6,70E-05      | 6,543       | 2,710      | 7,959  | 1,815         | 1,930         | 1,780         | 0,808         | 1,914          |
| 1,16E-07               | 1,11E-04      | 6,476       | 2,695      | 6,158  | 0,378         | 0,525         | 0,516         | 0,044         | 1,862          |
| 1,14E-07               | 4,38E-05      | 6,426       | 2,684      | 5,445  | 0,596         | 0,478         | 0,513         | 0,157         | 0,548          |
| 9,82E-03               | 5,80E-03      | 6,382       | 2,674      | 3,763  | -1,934        | -0,723        | -1,757        | -0,574        | 2,070          |
| 1,11E-07               | 6,47E-03      | 6,084       | 2,605      | 6,333  | 1,808         | 1,056         | 1,605         | 2,385         | 0,645          |
| 2,14E-02               | 9,87E-03      | 6,017       | 2,589      | 4,873  | -0,285        | -1,547        | -0,354        | -0,353        | 2,737          |
| 2,59E-06               | 2,18E-02      | 5,959       | 2,575      | 7,436  | 1,451         | 0,518         | 1,657         | 0,112         | -0,112         |
| 3,19E-07               | 1,92E-03      | 5,784       | 2,532      | 8,962  | 1,404         | 1,058         | 2,934         | 1,317         | 0,113          |
| 7,35E-03               | 1,71E-03      | 5,720       | 2,516      | 4,825  | 0,351         | -0,047        | -1,759        | 0,299         | -1,104         |
| 1,59E-06               | 1,97E-05      | 5,665       | 2,502      | 5,301  | -0,075        | 0,010         | -0,055        | -0,010        | 1,178          |
| 1,78E-08               | 5,65E-05      | 5,626       | 2,492      | 7,865  | 0,146         | 1,239         | 1,601         | 0,932         | 0,417          |
| 5,18E-04               | 1,23E-03      | 5,594       | 2,484      | 5,454  | -0,225        | 0,118         | -0,880        | -0,951        | 1,899          |
| 2,52E-11               | 7,96E-06      | 5,579       | 2,480      | 10,602 | 2,233         | 1,163         | 2,355         | 1,604         | 1,306          |
| 1,52E-03               | 9,59E-03      | 5,487       | 2,456      | 6,004  | -0,087        | -0,021        | -0,437        | -0,220        | 2,963          |
| 1,31E-07               | 2,36E-04      | 5,374       | 2,426      | 4,255  | -1,795        | -2,075        | -2,089        | -2,002        | -2,090         |
| 3,07E-03               | 1,70E-02      | 5,329       | 2,414      | 5,892  | 0,115         | -0,719        | -0,167        | -0,115        | 2,994          |
| 3,49E-05               | 1,40E-05      | 5,315       | 2,410      | 8,294  | 0,514         | 0,383         | 0,563         | 0,651         | 0,574          |
| 1,50E-07               | 3,15E-04      | 5,234       | 2,388      | 9,184  | 1,829         | 1,149         | 1,662         | 1,217         | 0,541          |
| 2,54E-10               | 1,44E-05      | 5,144       | 2,363      | 11,313 | 1,917         | 1,446         | 2,011         | 1,612         | 0,864          |
| 1,30E-08               | 6,49E-06      | 5,067       | 2,341      | 4,981  | -1,758        | -1,099        | -1,830        | -1,410        | -1,158         |
| 3,11E-04               | 4,40E-03      | 5,032       | 2,331      | 6,721  | -0,015        | 0,015         | -0,305        | -0,442        | 2,274          |
| 1,39E-02               | 7,73E-03      | 5,007       | 2,324      | 2,644  | 0,597         | 0,599         | -0,878        | -0,295        | 0,038          |
| 7,07E-09               | 1,07E-02      | 4,942       | 2,305      | 5,936  | 1,318         | 2,745         | 2,574         | 0,959         | 1,893          |
| 9,12E-05               | 2,59E-02      | 4,908       | 2,295      | 9,978  | 0,984         | 0,505         | 2,970         | 1,242         | -0,505         |
| 1,08E-10               | 4,26E-04      | 4,901       | 2,293      | 4,211  | -2,074        | -2,084        | -2,062        | -2,119        | -1,614         |
| 1,91E-02               | 3,87E-02      | 4,857       | 2,280      | 3,058  | -0,372        | -1,085        | -1,070        | -1,078        | 0,424          |
| 1,68E-10               | 1,88E-05      | 4,740       | 2,245      | 9,109  | 1,882         | 1,388         | 2,035         | 1,635         | 0,707          |
| 4,90E-04               | 8,68E-04      | 4,727       | 2,241      | 6,279  | -0,544        | -1,644        | -1,292        | -1,040        | 0,703          |
| 5,44E-07               | 1,95E-02      | 4,617       | 2,207      | 7,457  | 2,817         | 1,020         | 1,779         | 2,278         | 0,789          |

|          |          |       |       |        |        |        |        |        |        |
|----------|----------|-------|-------|--------|--------|--------|--------|--------|--------|
| 3,98E-10 | 4,48E-05 | 4,528 | 2,179 | 11,475 | 1,939  | 1,551  | 2,232  | 1,663  | 0,846  |
| 1,06E-04 | 4,19E-05 | 4,528 | 2,179 | 3,475  | -0,409 | -0,427 | -0,655 | -1,267 | -0,313 |
| 2,66E-04 | 1,33E-04 | 4,525 | 2,178 | 5,196  | -0,961 | -1,473 | -1,020 | -1,147 | 0,193  |
| 9,66E-06 | 3,77E-02 | 4,491 | 2,167 | 8,680  | 2,238  | 0,674  | 4,082  | 1,600  | 0,077  |
| 1,98E-09 | 2,59E-04 | 4,426 | 2,146 | 10,154 | 1,522  | 1,333  | 2,139  | 1,621  | 0,851  |
| 1,18E-09 | 3,88E-04 | 4,423 | 2,145 | 8,699  | 1,668  | 1,145  | 2,032  | 1,818  | 1,723  |
| 1,40E-02 | 2,42E-02 | 4,377 | 2,130 | 4,247  | 0,022  | -2,247 | 1,329  | -1,084 | -1,119 |
| 7,66E-10 | 9,31E-04 | 4,377 | 2,130 | 9,478  | 1,483  | 1,406  | 1,769  | 1,471  | 1,403  |
| 6,07E-10 | 2,02E-04 | 4,368 | 2,127 | 10,696 | 1,407  | 1,030  | 1,798  | 1,835  | 1,047  |
| 3,46E-10 | 2,96E-05 | 4,362 | 2,125 | 5,329  | 1,522  | 0,824  | 1,520  | 1,627  | 0,526  |
| 2,59E-07 | 2,05E-04 | 4,347 | 2,120 | 7,533  | 0,378  | -0,006 | 0,286  | 0,006  | 0,799  |
| 1,26E-10 | 3,27E-04 | 4,323 | 2,112 | 11,099 | 2,184  | 1,467  | 2,889  | 1,880  | 1,631  |
| 4,26E-08 | 3,31E-02 | 4,323 | 2,112 | 5,609  | 1,128  | 2,675  | 1,410  | 2,929  | 1,565  |
| 1,02E-02 | 3,57E-03 | 4,272 | 2,095 | 4,178  | -1,311 | -1,541 | 0,022  | -0,229 | -0,022 |
| 1,80E-03 | 1,19E-03 | 4,257 | 2,090 | 6,813  | -0,386 | -0,799 | -1,164 | -1,205 | 1,409  |
| 2,68E-09 | 9,75E-04 | 4,243 | 2,085 | 9,394  | 2,157  | 1,225  | 3,120  | 1,991  | 1,638  |
| 1,68E-09 | 6,00E-04 | 4,211 | 2,074 | 8,802  | 1,396  | 1,839  | 1,510  | 1,057  | 1,616  |
| 6,22E-10 | 7,41E-04 | 4,205 | 2,072 | 10,629 | 1,808  | 1,686  | 2,282  | 1,798  | 1,395  |
| 4,34E-06 | 5,17E-04 | 4,179 | 2,063 | 7,014  | 0,624  | 0,017  | 0,203  | -0,162 | 0,595  |
| 1,33E-04 | 4,14E-03 | 4,170 | 2,060 | 5,552  | 0,113  | -0,291 | 0,962  | -0,113 | 1,451  |
| 2,35E-10 | 9,98E-04 | 4,158 | 2,056 | 9,993  | 2,344  | 1,346  | 2,875  | 1,922  | 1,496  |
| 3,41E-02 | 4,50E-02 | 4,150 | 2,053 | 2,031  | -0,003 | -0,015 | -0,008 | 0,009  | -0,020 |
| 5,35E-06 | 2,19E-02 | 4,144 | 2,051 | 10,743 | 0,899  | 0,296  | 2,736  | 0,819  | -0,296 |
| 1,56E-03 | 1,97E-03 | 4,144 | 2,051 | 4,098  | -0,202 | -1,672 | -0,525 | -2,217 | -0,146 |
| 4,68E-08 | 8,17E-03 | 4,138 | 2,049 | 8,832  | 1,763  | 1,807  | 1,716  | 1,636  | 0,887  |
| 9,69E-04 | 4,93E-03 | 4,132 | 2,047 | 5,107  | -0,180 | -0,022 | 0,022  | 0,102  | 1,647  |
| 3,47E-12 | 2,66E-04 | 4,130 | 2,046 | 5,991  | -4,097 | -2,805 | -3,409 | -2,489 | -3,626 |
| 1,94E-04 | 4,57E-04 | 4,112 | 2,040 | 3,908  | -0,171 | -0,819 | -1,091 | -0,054 | -0,035 |
| 4,43E-11 | 6,05E-05 | 4,101 | 2,036 | 11,259 | 2,071  | 1,148  | 2,661  | 1,842  | 1,371  |
| 4,19E-10 | 6,55E-05 | 4,095 | 2,034 | 11,345 | 1,837  | 1,545  | 2,258  | 1,730  | 0,921  |
| 3,90E-09 | 7,49E-05 | 4,093 | 2,033 | 9,210  | 1,808  | 1,238  | 1,703  | 1,325  | 0,638  |
| 1,17E-02 | 6,50E-03 | 4,073 | 2,026 | 3,721  | -1,819 | 0,301  | -1,850 | -1,831 | 0,140  |
| 3,28E-03 | 1,71E-02 | 4,061 | 2,022 | 6,411  | -0,143 | -0,451 | 0,143  | -0,292 | 2,288  |
| 2,17E-06 | 2,95E-02 | 4,033 | 2,012 | 7,026  | 1,865  | 0,016  | 1,806  | 1,932  | -0,016 |
| 1,02E-10 | 2,26E-04 | 4,031 | 2,011 | 11,829 | 2,192  | 1,362  | 2,767  | 1,908  | 1,399  |
| 2,93E-07 | 1,53E-03 | 4,017 | 2,006 | 8,341  | 2,202  | 1,739  | 1,893  | 1,447  | 0,644  |
| 2,03E-10 | 4,01E-06 | 3,997 | 1,999 | 5,974  | 0,792  | 0,800  | 0,824  | 0,911  | 1,092  |
| 1,00E-04 | 9,94E-03 | 3,975 | 1,991 | 4,394  | -2,390 | -1,936 | -1,567 | -2,416 | -0,102 |
| 8,28E-12 | 1,17E-05 | 3,910 | 1,967 | 9,090  | 1,975  | 1,343  | 2,008  | 2,194  | 1,167  |
| 4,48E-03 | 4,72E-03 | 3,910 | 1,967 | 2,745  | 0,304  | -0,831 | -0,840 | -0,868 | 0,599  |
| 4,14E-08 | 1,28E-03 | 3,893 | 1,961 | 9,069  | 2,016  | 1,506  | 2,266  | 2,084  | 1,216  |
| 2,00E-11 | 6,29E-05 | 3,891 | 1,960 | 11,519 | 2,107  | 1,315  | 2,746  | 1,867  | 1,439  |
| 3,22E-09 | 6,72E-04 | 3,883 | 1,957 | 9,358  | 1,482  | 1,689  | 1,729  | 1,469  | 0,958  |
| 3,41E-11 | 1,48E-04 | 3,872 | 1,953 | 9,697  | 1,345  | 1,539  | 2,148  | 1,650  | 1,314  |
| 1,09E-08 | 2,67E-03 | 3,861 | 1,949 | 6,521  | 2,057  | 0,600  | 0,891  | 2,141  | 0,328  |
| 5,56E-11 | 1,68E-04 | 3,792 | 1,923 | 11,027 | 1,781  | 1,666  | 2,225  | 1,882  | 1,384  |
| 1,62E-05 | 3,53E-05 | 3,789 | 1,922 | 9,050  | -0,697 | -0,384 | -0,666 | -1,017 | -0,446 |
| 1,71E-08 | 6,01E-04 | 3,776 | 1,917 | 3,889  | -1,779 | -1,809 | -1,810 | -0,816 | -1,813 |
| 8,57E-09 | 5,57E-04 | 3,774 | 1,916 | 8,917  | 2,401  | 1,132  | 1,814  | 1,153  | 0,813  |
| 7,45E-11 | 1,90E-04 | 3,753 | 1,908 | 11,234 | 1,779  | 1,619  | 2,246  | 1,711  | 1,363  |
| 2,66E-09 | 1,58E-03 | 3,753 | 1,908 | 7,887  | 1,858  | 1,712  | 2,138  | 1,919  | 1,555  |
| 3,68E-11 | 3,08E-06 | 3,704 | 1,889 | 16,491 | 1,060  | 0,946  | 1,197  | 0,953  | 0,700  |
| 2,02E-07 | 7,43E-03 | 3,681 | 1,880 | 8,565  | 1,359  | 1,864  | 1,294  | 0,694  | 0,354  |
| 7,79E-05 | 4,92E-02 | 3,668 | 1,875 | 8,648  | 2,205  | 0,703  | 4,076  | 1,632  | 0,130  |
| 1,25E-04 | 1,56E-02 | 3,650 | 1,868 | 4,678  | -0,364 | 0,048  | 0,337  | -0,330 | 2,421  |
| 4,38E-05 | 1,67E-05 | 3,650 | 1,868 | 6,478  | -0,219 | -0,120 | 0,119  | -0,612 | -0,809 |

|          |          |       |       |        |        |        |        |        |        |
|----------|----------|-------|-------|--------|--------|--------|--------|--------|--------|
| 5,04E-06 | 2,59E-04 | 3,650 | 1,868 | 6,723  | -0,851 | -1,387 | -1,173 | -2,056 | -1,136 |
| 4,90E-10 | 2,03E-04 | 3,615 | 1,854 | 9,672  | 1,595  | 1,618  | 1,846  | 1,541  | 0,949  |
| 2,33E-08 | 6,76E-05 | 3,610 | 1,852 | 6,554  | 0,534  | 0,263  | 0,299  | 0,393  | 1,836  |
| 8,62E-07 | 3,78E-02 | 3,603 | 1,849 | 9,450  | 1,944  | 1,463  | 2,055  | 2,032  | 0,742  |
| 1,00E-11 | 1,32E-04 | 3,600 | 1,848 | 10,069 | 2,247  | 1,337  | 2,467  | 1,597  | 1,326  |
| 6,34E-09 | 8,10E-03 | 3,585 | 1,842 | 8,696  | 2,370  | 1,584  | 2,512  | 0,951  | 1,124  |
| 1,04E-08 | 7,44E-03 | 3,565 | 1,834 | 7,989  | 1,482  | 1,615  | 1,944  | 1,574  | 1,237  |
| 4,12E-06 | 3,69E-05 | 3,563 | 1,833 | 6,066  | -0,733 | -0,519 | -0,886 | -0,752 | -0,453 |
| 1,15E-03 | 1,33E-03 | 3,555 | 1,830 | 8,944  | -0,401 | -1,145 | -1,150 | -1,302 | 0,198  |
| 2,46E-10 | 6,11E-05 | 3,548 | 1,827 | 10,323 | 1,644  | 1,472  | 1,769  | 1,521  | 0,911  |
| 2,63E-11 | 1,02E-04 | 3,533 | 1,821 | 12,686 | 2,199  | 1,363  | 2,673  | 1,814  | 1,466  |
| 2,02E-05 | 2,22E-04 | 3,519 | 1,815 | 5,613  | -0,092 | -0,438 | -0,739 | -0,838 | -0,309 |
| 1,09E-09 | 4,27E-04 | 3,509 | 1,811 | 11,980 | 1,739  | 1,009  | 1,858  | 1,843  | 1,017  |
| 4,40E-07 | 1,41E-02 | 3,506 | 1,810 | 9,559  | 1,598  | 1,095  | 2,143  | 1,557  | 0,645  |
| 7,74E-09 | 2,05E-03 | 3,504 | 1,809 | 4,786  | 1,647  | 0,344  | 2,137  | 2,425  | 1,384  |
| 3,08E-06 | 2,09E-05 | 3,497 | 1,806 | 4,668  | -0,892 | -1,037 | -0,348 | -0,150 | -1,229 |
| 2,84E-12 | 4,62E-06 | 3,473 | 1,796 | 14,290 | 1,638  | 1,428  | 1,966  | 1,554  | 1,156  |
| 2,44E-06 | 2,90E-03 | 3,458 | 1,790 | 12,375 | 0,695  | 0,054  | 0,116  | 0,061  | 0,341  |
| 1,96E-12 | 9,84E-04 | 3,427 | 1,777 | 6,878  | -3,864 | -3,542 | -3,336 | -3,750 | -2,602 |
| 2,06E-11 | 3,21E-04 | 3,378 | 1,756 | 11,264 | 2,354  | 1,427  | 2,813  | 2,107  | 1,628  |
| 4,21E-09 | 1,37E-03 | 3,371 | 1,753 | 11,045 | 1,759  | 0,830  | 1,960  | 2,027  | 1,082  |
| 2,04E-10 | 2,88E-04 | 3,366 | 1,751 | 13,483 | 1,607  | 1,469  | 2,014  | 1,624  | 0,966  |
| 3,82E-09 | 2,20E-03 | 3,343 | 1,741 | 9,204  | 2,151  | 1,024  | 2,564  | 1,688  | 1,433  |
| 5,88E-10 | 2,63E-04 | 3,324 | 1,733 | 15,135 | 1,311  | 0,965  | 1,613  | 1,336  | 0,814  |
| 1,91E-10 | 1,46E-03 | 3,315 | 1,729 | 5,630  | -2,339 | -3,742 | -3,742 | -2,207 | -3,119 |
| 4,68E-06 | 1,93E-03 | 3,260 | 1,705 | 8,654  | 0,961  | -0,015 | 0,015  | 0,289  | 0,539  |
| 3,91E-08 | 4,82E-06 | 3,256 | 1,703 | 7,538  | -1,048 | -1,498 | -1,010 | -1,187 | -0,977 |
| 8,62E-07 | 2,59E-02 | 3,245 | 1,698 | 8,999  | 1,975  | 1,978  | 1,697  | 0,804  | 0,522  |
| 7,88E-07 | 4,62E-05 | 3,242 | 1,697 | 2,307  | -0,103 | -0,208 | -0,194 | -0,216 | -0,211 |
| 1,93E-02 | 2,02E-02 | 3,229 | 1,691 | 6,882  | -0,386 | -0,722 | -0,580 | -0,285 | 2,331  |
| 1,13E-06 | 2,14E-02 | 3,220 | 1,687 | 7,023  | -0,652 | -0,460 | -0,079 | 0,214  | 0,638  |
| 5,24E-07 | 1,99E-04 | 3,207 | 1,681 | 6,139  | -1,200 | -1,741 | -1,066 | -1,507 | -0,401 |
| 2,83E-10 | 5,86E-04 | 3,187 | 1,672 | 11,483 | 1,607  | 1,342  | 2,012  | 1,514  | 1,198  |
| 3,15E-03 | 2,96E-02 | 3,167 | 1,663 | 6,699  | 0,029  | -0,327 | 0,047  | -0,345 | 2,549  |
| 9,99E-09 | 1,26E-02 | 3,154 | 1,657 | 8,471  | 1,784  | 1,448  | 2,046  | 1,384  | 1,451  |
| 5,18E-10 | 1,55E-04 | 3,147 | 1,654 | 14,881 | 1,204  | 0,839  | 1,488  | 1,304  | 0,785  |
| 2,68E-09 | 1,52E-03 | 3,123 | 1,643 | 9,552  | 1,453  | 1,649  | 1,854  | 1,516  | 0,973  |
| 1,46E-08 | 2,97E-06 | 3,082 | 1,624 | 7,342  | 0,032  | -0,032 | -0,176 | -0,429 | 0,505  |
| 2,66E-09 | 4,56E-05 | 3,069 | 1,618 | 10,181 | -1,469 | -1,621 | -1,781 | -1,672 | -0,671 |
| 5,73E-10 | 2,96E-04 | 3,067 | 1,617 | 7,732  | -1,859 | -3,313 | -2,411 | -2,869 | -1,418 |
| 6,84E-09 | 2,72E-02 | 3,067 | 1,617 | 7,686  | -2,886 | -3,371 | -3,946 | -3,509 | -4,923 |
| 9,08E-03 | 4,60E-02 | 3,029 | 1,599 | 7,157  | -2,761 | -1,652 | -1,971 | -2,304 | 1,493  |
| 1,32E-11 | 1,22E-05 | 2,998 | 1,584 | 8,505  | 1,465  | 1,115  | 1,384  | 1,155  | 1,054  |
| 3,17E-03 | 2,85E-03 | 2,983 | 1,577 | 6,826  | -0,771 | -0,968 | -0,573 | -0,944 | 0,428  |
| 1,67E-09 | 2,82E-04 | 2,965 | 1,568 | 7,926  | 1,222  | 0,878  | 1,002  | 0,992  | 0,522  |
| 4,12E-09 | 7,56E-04 | 2,910 | 1,541 | 12,411 | 1,128  | 1,062  | 1,315  | 1,153  | 0,467  |
| 7,26E-10 | 1,92E-03 | 2,880 | 1,526 | 9,689  | 1,768  | 1,642  | 2,070  | 1,462  | 1,372  |
| 5,30E-07 | 1,09E-04 | 2,834 | 1,503 | 10,524 | -0,960 | -0,595 | -1,368 | -1,790 | -1,231 |
| 1,13E-05 | 2,10E-02 | 2,797 | 1,484 | 4,715  | 0,710  | 0,279  | 0,600  | 0,353  | 0,947  |
| 9,09E-04 | 1,44E-03 | 2,759 | 1,464 | 14,060 | -0,152 | 0,003  | 0,064  | -0,160 | -0,575 |
| 2,10E-09 | 6,62E-04 | 2,747 | 1,458 | 9,865  | 1,637  | 0,985  | 1,374  | 1,757  | 0,716  |
| 2,99E-02 | 2,05E-02 | 2,742 | 1,455 | 5,843  | -0,378 | -1,076 | -0,247 | 0,018  | 2,531  |
| 4,23E-08 | 3,22E-03 | 2,736 | 1,452 | 10,847 | -2,300 | -2,208 | -2,281 | -2,266 | -1,127 |
| 2,71E-11 | 3,17E-04 | 2,726 | 1,447 | 14,643 | 1,359  | 1,583  | 1,464  | 1,108  | 1,778  |
| 4,06E-06 | 3,83E-05 | 2,721 | 1,444 | 13,958 | 0,214  | -0,165 | -0,093 | -0,237 | 0,469  |
| 1,65E-07 | 1,03E-05 | 2,709 | 1,438 | 7,084  | 0,202  | -0,038 | -0,043 | -0,146 | 0,290  |

|          |          |       |       |        |        |        |        |        |        |
|----------|----------|-------|-------|--------|--------|--------|--------|--------|--------|
| 1,81E-06 | 2,28E-02 | 2,676 | 1,420 | 9,957  | 0,365  | 0,000  | 0,467  | 0,140  | 0,000  |
| 4,98E-08 | 3,58E-02 | 2,595 | 1,376 | 6,555  | 1,105  | 0,779  | 1,369  | 0,998  | 0,790  |
| 1,36E-05 | 6,75E-06 | 2,595 | 1,376 | 9,845  | -0,244 | -0,058 | -0,868 | -0,994 | -0,760 |
| 8,62E-04 | 1,93E-03 | 2,583 | 1,369 | 5,544  | 0,059  | -0,499 | 0,131  | -0,615 | 0,674  |
| 7,26E-10 | 5,03E-04 | 2,578 | 1,366 | 5,063  | -1,601 | -2,488 | -3,275 | -1,778 | -2,199 |
| 3,92E-05 | 4,64E-04 | 2,521 | 1,334 | 7,760  | 0,114  | -0,061 | 0,061  | -0,661 | 0,466  |
| 1,15E-08 | 2,99E-04 | 2,519 | 1,333 | 5,734  | -1,430 | -1,186 | -0,629 | -1,810 | -0,916 |
| 7,08E-07 | 3,04E-02 | 2,509 | 1,327 | 7,801  | 2,501  | 1,177  | 1,754  | 2,367  | 0,882  |
| 9,35E-04 | 6,25E-03 | 2,485 | 1,313 | 10,520 | 0,081  | -0,296 | -0,117 | -0,506 | 1,807  |
| 4,61E-07 | 2,22E-02 | 2,473 | 1,306 | 8,076  | 1,508  | 1,715  | 1,583  | 1,236  | 0,967  |
| 1,72E-04 | 1,07E-04 | 2,454 | 1,295 | 6,555  | -0,048 | -0,659 | 0,039  | -0,670 | -0,085 |
| 9,31E-07 | 2,44E-03 | 2,417 | 1,273 | 6,318  | 0,467  | 0,023  | 0,270  | -0,023 | 0,746  |
| 2,42E-03 | 5,30E-04 | 2,403 | 1,265 | 5,490  | 0,141  | 0,120  | -0,010 | 0,182  | -0,045 |
| 2,08E-04 | 4,82E-05 | 2,383 | 1,253 | 9,589  | 0,186  | -0,270 | -0,074 | -0,123 | 0,345  |
| 1,58E-09 | 7,36E-05 | 2,373 | 1,247 | 8,409  | 0,559  | 0,429  | 0,336  | 0,815  | 0,745  |
| 5,12E-08 | 5,16E-04 | 2,331 | 1,221 | 12,774 | 0,543  | 0,107  | 0,273  | 0,064  | 0,979  |
| 1,36E-02 | 4,28E-02 | 2,328 | 1,219 | 5,456  | -0,026 | -0,218 | -0,117 | 0,005  | 2,500  |
| 2,29E-08 | 1,02E-02 | 2,326 | 1,218 | 11,385 | 1,038  | 1,446  | 2,797  | 2,387  | 1,082  |
| 4,70E-03 | 3,14E-02 | 2,326 | 1,218 | 4,264  | 0,159  | -0,166 | 0,024  | -0,440 | 0,184  |
| 1,14E-03 | 5,55E-03 | 2,315 | 1,211 | 5,194  | 0,001  | 0,608  | 0,175  | 0,308  | 0,272  |
| 1,45E-02 | 2,67E-02 | 2,291 | 1,196 | 8,070  | -0,355 | -1,256 | -0,761 | -1,387 | 0,467  |
| 5,29E-04 | 4,66E-03 | 2,278 | 1,188 | 7,700  | 0,033  | -0,274 | -0,030 | -0,324 | 0,643  |
| 3,60E-08 | 4,81E-06 | 2,269 | 1,182 | 10,455 | -0,567 | -0,446 | -0,601 | -0,581 | -0,026 |
| 8,33E-05 | 7,00E-05 | 2,269 | 1,182 | 5,696  | -0,282 | -0,409 | -0,562 | -0,442 | -0,369 |
| 3,70E-09 | 2,32E-04 | 2,242 | 1,165 | 7,658  | 1,131  | 1,013  | 1,210  | 1,036  | 1,106  |
| 8,52E-08 | 1,32E-03 | 2,242 | 1,165 | 9,802  | 0,552  | 0,047  | 0,130  | 0,074  | 0,906  |
| 7,93E-06 | 7,93E-04 | 2,227 | 1,155 | 6,039  | -0,244 | 0,100  | 0,362  | 0,131  | -0,355 |
| 4,04E-06 | 2,80E-02 | 2,224 | 1,153 | 7,990  | -1,735 | -0,199 | -2,632 | -1,907 | -1,868 |
| 1,22E-07 | 1,59E-04 | 2,198 | 1,136 | 8,469  | 0,210  | 0,232  | 0,315  | 0,061  | -0,061 |
| 3,47E-02 | 1,53E-02 | 2,175 | 1,121 | 7,028  | 0,000  | -0,910 | 0,000  | -0,650 | 0,354  |
| 3,87E-03 | 2,38E-03 | 2,164 | 1,114 | 11,820 | -0,021 | 0,231  | 0,021  | -0,311 | -0,506 |
| 1,41E-08 | 1,49E-02 | 2,152 | 1,106 | 10,912 | 1,049  | 1,630  | 2,858  | 2,575  | 1,149  |
| 9,14E-07 | 7,58E-03 | 2,133 | 1,093 | 7,557  | 0,115  | 0,218  | 0,277  | 0,074  | 0,377  |
| 2,74E-11 | 1,32E-03 | 2,120 | 1,084 | 6,581  | -2,028 | -2,599 | -2,205 | -1,691 | -2,094 |
| 4,37E-06 | 4,10E-02 | 2,071 | 1,050 | 3,271  | -1,439 | -1,443 | -1,445 | -1,453 | -1,445 |
| 5,99E-09 | 1,63E-03 | 2,066 | 1,047 | 5,853  | 0,747  | 1,188  | 0,965  | 0,429  | 1,207  |
| 1,72E-08 | 3,33E-02 | 2,058 | 1,041 | 11,196 | 1,385  | 0,486  | 0,795  | 0,489  | 1,942  |
| 1,24E-07 | 6,64E-07 | 2,042 | 1,030 | 11,463 | -0,175 | -0,123 | -0,141 | -0,411 | -0,263 |
| 1,35E-03 | 4,38E-03 | 2,020 | 1,014 | 9,511  | -0,978 | -0,860 | -0,947 | -0,889 | 0,304  |
| 1,50E-10 | 1,98E-03 | 2,017 | 1,012 | 11,424 | -1,285 | -1,032 | -1,039 | -1,471 | -1,897 |

| CD4creGARPII-fl_non-stim_22 | CD4creGARPII-fl_non-stim_23 | CD4creGARPII-fl_non-stim_8 | CD4creGARPII-fl_non-stim_9 | CD4creGARPII-fl_non-stim_10 | wt_stim_11 | wt_stim_12 | wt_stim_13 | wt_stim_14 | wt_stim_15 | CD4creGARPII-fl_stim_24 |
|-----------------------------|-----------------------------|----------------------------|----------------------------|-----------------------------|------------|------------|------------|------------|------------|-------------------------|
| 2,227                       | 3,640                       | 1,003                      | 0,585                      | 0,955                       | -3,386     | -3,346     | -3,544     | -2,710     | -3,378     | 3,309                   |
| -1,188                      | -1,182                      | -0,254                     | 5,723                      | -1,141                      | 0,254      | -1,142     | 2,056      | 2,066      | 0,901      | 6,174                   |
| 3,510                       | 3,620                       | 3,664                      | 3,739                      | 3,684                       | -6,020     | -5,715     | -5,328     | -5,289     | -5,928     | -1,498                  |
| 4,036                       | 4,285                       | 4,449                      | 4,594                      | 4,503                       | -5,922     | -5,647     | -5,419     | -5,287     | -5,894     | -1,650                  |
| 4,774                       | 5,291                       | 5,818                      | 6,266                      | 5,838                       | -5,493     | -5,571     | -5,472     | -5,730     | -7,360     | -1,568                  |
| 2,156                       | 3,934                       | 3,344                      | 5,025                      | 4,313                       | -4,688     | -4,925     | -4,834     | -4,275     | -3,809     | -4,393                  |
| 0,158                       | 2,525                       | 3,928                      | 0,305                      | 2,461                       | -3,737     | -1,986     | -1,083     | -3,540     | -4,086     | 0,311                   |
| 3,527                       | 3,088                       | 1,323                      | 0,495                      | 0,530                       | -2,007     | -2,106     | -2,146     | -2,482     | -2,025     | 2,528                   |
| 0,451                       | 2,086                       | 0,219                      | 0,250                      | 0,154                       | -1,349     | -1,738     | -1,359     | -2,808     | -2,754     | 1,470                   |
| 0,251                       | 0,604                       | 0,114                      | 0,528                      | 0,468                       | -2,891     | -2,126     | -1,544     | -2,869     | -2,873     | 0,595                   |
| 1,921                       | 3,168                       | 2,260                      | 4,132                      | 2,296                       | -4,782     | -4,328     | -2,294     | -4,780     | -6,744     | -1,648                  |
| 1,423                       | 2,473                       | 2,150                      | 2,705                      | 2,074                       | -5,607     | -6,114     | -6,700     | -6,184     | -6,693     | -2,022                  |
| 0,972                       | 2,468                       | 1,700                      | 2,948                      | 1,262                       | -1,277     | -2,583     | -3,615     | -3,870     | -3,842     | -0,078                  |
| 2,300                       | 2,066                       | 1,851                      | 3,514                      | 2,547                       | -4,735     | -4,792     | -2,991     | -3,195     | -6,803     | -0,294                  |
| 4,601                       | 2,682                       | 3,380                      | 3,266                      | 3,175                       | -3,498     | -2,870     | -4,622     | -4,601     | -5,720     | -0,853                  |
| 2,946                       | 3,531                       | 3,270                      | 3,545                      | 2,998                       | -0,784     | -2,062     | -2,077     | -2,068     | -2,049     | 1,490                   |
| -0,811                      | -0,575                      | 0,527                      | 0,447                      | 1,147                       | -0,807     | 0,313      | -0,810     | -0,815     | -0,812     | 4,078                   |
| 2,478                       | 2,956                       | 2,883                      | 3,659                      | 3,191                       | -3,382     | -3,671     | -3,925     | -5,878     | -5,729     | -1,358                  |
| 1,355                       | 2,197                       | 1,193                      | 1,526                      | 1,599                       | -2,344     | -2,858     | -3,307     | -3,678     | -3,308     | -0,044                  |
| 0,648                       | 1,295                       | 0,720                      | 0,958                      | 0,479                       | -2,306     | -2,105     | -3,492     | -3,330     | -3,493     | -0,157                  |
| 0,620                       | 1,137                       | -0,248                     | 0,810                      | 0,337                       | -1,925     | -0,847     | -1,925     | -1,909     | -1,178     | 0,980                   |
| 1,840                       | 1,714                       | 3,218                      | 5,989                      | 3,799                       | -4,028     | -4,414     | -3,879     | -4,433     | -4,416     | -2,248                  |
| 0,935                       | 2,076                       | 0,204                      | 0,819                      | 0,504                       | -0,948     | -1,342     | -1,509     | -2,517     | -0,342     | 2,023                   |
| 2,807                       | 1,459                       | 1,680                      | 1,412                      | 5,488                       | -3,655     | -5,614     | -5,595     | -5,627     | -5,547     | -2,229                  |
| 2,459                       | 2,430                       | 2,582                      | 3,416                      | 2,928                       | -3,902     | -4,376     | -2,547     | -2,601     | -6,095     | -0,113                  |
| -0,826                      | -0,283                      | 1,385                      | 0,615                      | 0,329                       | -1,934     | -0,798     | -0,769     | -2,301     | -0,947     | 3,348                   |
| 1,493                       | 1,135                       | 1,070                      | 1,377                      | 1,795                       | -1,877     | -2,223     | -1,662     | -2,274     | -2,545     | 1,102                   |
| 1,386                       | 1,867                       | 2,230                      | 2,014                      | 2,061                       | -2,835     | -3,392     | -2,997     | -2,943     | -4,060     | -0,146                  |
| 0,695                       | 1,227                       | 0,456                      | 0,624                      | 1,598                       | -1,853     | -2,082     | -1,622     | -1,796     | -2,037     | 1,136                   |
| 2,662                       | 3,093                       | 2,935                      | 3,157                      | 3,314                       | -3,771     | -4,307     | -3,518     | -4,867     | -5,181     | -1,501                  |
| 1,304                       | 1,738                       | 1,104                      | 0,672                      | 1,481                       | -4,161     | -2,370     | -1,949     | -2,005     | -4,044     | 1,657                   |
| -2,197                      | -2,175                      | -2,112                     | 0,333                      | -2,083                      | 0,883      | 1,451      | 0,822      | 1,201      | -0,333     | 5,191                   |
| 1,252                       | 3,330                       | 0,563                      | 1,161                      | 0,715                       | -2,061     | -2,810     | -2,397     | -1,840     | -1,135     | 0,795                   |
| -0,641                      | -0,126                      | -0,172                     | -0,542                     | -0,825                      | -1,309     | -1,362     | -1,436     | -1,784     | -0,101     | 1,303                   |
| 1,765                       | 2,305                       | 2,250                      | 2,533                      | 2,363                       | -3,543     | -4,576     | -3,440     | -3,153     | -7,181     | -1,155                  |
| 1,561                       | 2,246                       | 2,417                      | 2,680                      | 2,150                       | -3,395     | -4,038     | -3,405     | -3,787     | -5,248     | -1,424                  |
| -0,979                      | -0,754                      | -0,227                     | -0,554                     | -0,270                      | 0,569      | 0,628      | 0,711      | 0,227      | 0,686      | 3,974                   |
| 1,799                       | 2,674                       | 0,756                      | 0,987                      | 1,177                       | -1,850     | -2,050     | -1,683     | -2,741     | -1,033     | 1,022                   |
| -0,485                      | -0,318                      | -0,711                     | -0,410                     | 0,881                       | -0,619     | -0,038     | -0,591     | 0,512      | -0,774     | 1,733                   |
| 2,544                       | 4,165                       | 4,680                      | 4,288                      | 2,705                       | -4,167     | -3,386     | -4,169     | -2,157     | -4,171     | -1,337                  |
| 1,353                       | 2,083                       | 2,199                      | 2,614                      | 6,085                       | -4,090     | -4,302     | -2,848     | -3,578     | -8,064     | -0,946                  |
| -2,137                      | -2,098                      | -2,091                     | -1,674                     | -2,055                      | 1,920      | 2,279      | 1,846      | 4,023      | 1,614      | 4,722                   |
| 0,731                       | -0,234                      | 0,183                      | -1,045                     | -0,183                      | -1,062     | 1,116      | -1,060     | 1,114      | -1,047     | 1,233                   |
| 1,272                       | 2,134                       | 2,337                      | 2,765                      | 1,971                       | -3,432     | -3,773     | -3,599     | -3,772     | -3,986     | -1,528                  |
| 0,527                       | 0,583                       | 0,768                      | 0,378                      | 0,993                       | -1,649     | -1,718     | -1,311     | -1,945     | -0,372     | 0,965                   |
| 2,120                       | 2,016                       | 3,123                      | 5,907                      | 3,930                       | -2,676     | -5,421     | -3,976     | -3,476     | -5,499     | -1,769                  |

|        |        |        |        |        |        |        |        |        |        |        |
|--------|--------|--------|--------|--------|--------|--------|--------|--------|--------|--------|
| 1,557  | 2,254  | 2,498  | 2,687  | 2,153  | -3,347 | -3,854 | -3,289 | -3,668 | -5,075 | -1,489 |
| 0,205  | -0,031 | 0,031  | 0,267  | 0,277  | -0,111 | 0,285  | -1,034 | -1,519 | -1,459 | 1,076  |
| -0,392 | 0,126  | 0,249  | -0,006 | 0,346  | -1,486 | -1,483 | -0,796 | -1,616 | 0,006  | 1,056  |
| 1,430  | 3,001  | 3,692  | 3,008  | 2,420  | -1,788 | -2,911 | -1,813 | -3,516 | -4,527 | -0,404 |
| 1,408  | 2,106  | 2,542  | 2,443  | 1,975  | -3,676 | -3,924 | -2,813 | -3,758 | -5,208 | -1,613 |
| 1,627  | 2,358  | 4,006  | 3,322  | 3,272  | -2,993 | -3,457 | -2,961 | -3,839 | -4,742 | -1,145 |
| -0,844 | -0,022 | -0,806 | -2,222 | 0,086  | 0,493  | 0,064  | -0,163 | -1,702 | -0,808 | 2,890  |
| 2,617  | 2,824  | 3,312  | 3,883  | 3,440  | -4,075 | -3,549 | -3,530 | -4,100 | -6,338 | -1,403 |
| 1,382  | 2,147  | 2,239  | 2,566  | 1,817  | -3,121 | -3,704 | -2,859 | -3,895 | -4,734 | -1,577 |
| 1,336  | 2,093  | 1,852  | 2,150  | 1,914  | -3,100 | -3,461 | -3,477 | -2,592 | -3,433 | -1,076 |
| 0,777  | 1,313  | 1,014  | 1,418  | 2,101  | -2,955 | -3,418 | -2,739 | -3,683 | -2,019 | -0,465 |
| 3,048  | 2,895  | 2,697  | 3,625  | 3,859  | -3,602 | -3,734 | -3,230 | -3,612 | -5,271 | -1,467 |
| 1,649  | 1,890  | 3,317  | 1,968  | 3,094  | -2,427 | -3,653 | -3,637 | -3,653 | -3,645 | -1,296 |
| 0,094  | 0,132  | 0,114  | -0,526 | 0,125  | 0,088  | -1,847 | -1,121 | -1,913 | -1,717 | 0,377  |
| 0,148  | 1,196  | 0,033  | 0,413  | 1,329  | -1,508 | -1,158 | -1,295 | -2,189 | -1,334 | 1,401  |
| 2,831  | 2,429  | 2,383  | 3,078  | 3,715  | -3,904 | -3,732 | -2,823 | -4,273 | -5,750 | -1,225 |
| 0,859  | 2,068  | 1,691  | 2,152  | 1,615  | -4,153 | -4,214 | -4,079 | -4,561 | -3,335 | -1,380 |
| 2,375  | 3,464  | 3,472  | 4,076  | 3,420  | -3,737 | -3,716 | -3,232 | -3,893 | -5,938 | -1,395 |
| 0,909  | 2,036  | 1,126  | 0,889  | 1,498  | -2,264 | -2,431 | -1,970 | -2,018 | -4,348 | -0,201 |
| 1,090  | 2,121  | 0,619  | 0,754  | 0,536  | -1,190 | -2,331 | -2,095 | -2,404 | -3,362 | 0,927  |
| 2,887  | 2,698  | 2,499  | 3,359  | 3,824  | -3,730 | -3,684 | -3,092 | -4,016 | -4,970 | -1,599 |
| -0,030 | 0,194  | -0,004 | 0,186  | 0,006  | -0,024 | -0,016 | 0,772  | 0,000  | 0,063  | 0,000  |
| 1,496  | 1,996  | 2,282  | 2,879  | 5,159  | -3,885 | -3,947 | -2,949 | -3,746 | -5,877 | -1,244 |
| 0,565  | 0,891  | 0,592  | 0,724  | 0,062  | -1,417 | -0,650 | -0,062 | -1,646 | -2,218 | 1,571  |
| 2,363  | 2,374  | 2,441  | 2,512  | 2,047  | -4,276 | -3,434 | -3,612 | -4,795 | -6,997 | -0,887 |
| 0,917  | 1,378  | 0,729  | -0,033 | 1,370  | -1,214 | -2,237 | -1,543 | -1,910 | -1,891 | 1,800  |
| -3,488 | -3,858 | -2,544 | -4,074 | -2,526 | 3,605  | 3,276  | 3,559  | 2,489  | 3,995  | 6,321  |
| 1,886  | 0,035  | 0,191  | 1,035  | 1,513  | -0,765 | -0,617 | -1,976 | -1,401 | -1,934 | 0,721  |
| 2,685  | 2,966  | 2,863  | 3,084  | 3,499  | -3,750 | -4,023 | -3,357 | -4,203 | -5,120 | -1,572 |
| 1,543  | 2,242  | 2,491  | 2,675  | 2,141  | -3,332 | -3,657 | -3,079 | -3,875 | -5,082 | -1,623 |
| 1,786  | 2,306  | 2,308  | 2,592  | 2,360  | -3,016 | -3,841 | -3,001 | -2,830 | -5,091 | -0,842 |
| 0,133  | -0,470 | -1,720 | 0,006  | 0,746  | -0,554 | -1,099 | -0,006 | -1,851 | -1,847 | 1,199  |
| 0,749  | 2,412  | 0,390  | 0,729  | 0,415  | -1,666 | -1,841 | -1,201 | -1,962 | -1,301 | 0,356  |
| 4,475  | 3,432  | 2,668  | 2,751  | 2,991  | -2,526 | -2,834 | -2,633 | -2,363 | -5,004 | 0,493  |
| 2,855  | 2,776  | 2,642  | 3,173  | 3,715  | -3,842 | -3,698 | -3,243 | -3,939 | -5,261 | -1,516 |
| 1,308  | 2,345  | 2,285  | 3,258  | 1,742  | -3,093 | -3,031 | -3,944 | -3,042 | -6,571 | -1,080 |
| 1,545  | 2,034  | 1,229  | 1,440  | 1,156  | -2,880 | -3,255 | -2,604 | -3,135 | -4,074 | -0,924 |
| -0,542 | 0,328  | -2,064 | -2,397 | -2,410 | 0,457  | 0,730  | 1,111  | 0,102  | -0,171 | 5,317  |
| 2,673  | 3,296  | 3,703  | 4,046  | 3,229  | -3,297 | -3,423 | -3,380 | -3,701 | -4,463 | -1,286 |
| -0,680 | 0,064  | -0,859 | -0,791 | 1,368  | -0,839 | -0,222 | 0,706  | -0,064 | -0,804 | 2,103  |
| 2,265  | 2,880  | 2,749  | 3,306  | 3,095  | -3,509 | -3,385 | -3,057 | -4,717 | -7,228 | -1,216 |
| 2,750  | 2,839  | 2,739  | 3,194  | 3,640  | -3,851 | -3,832 | -3,363 | -3,899 | -4,867 | -1,580 |
| 1,289  | 2,142  | 1,612  | 2,631  | 2,425  | -3,426 | -2,781 | -2,973 | -3,200 | -4,694 | -0,958 |
| 2,704  | 3,481  | 3,532  | 3,860  | 3,470  | -3,898 | -3,622 | -3,411 | -4,278 | -5,212 | -1,314 |
| 3,645  | 3,311  | 2,523  | 3,432  | 2,245  | -2,852 | -4,082 | -3,357 | -4,414 | -3,461 | -0,328 |
| 2,340  | 3,442  | 3,464  | 4,049  | 3,474  | -3,758 | -3,745 | -3,393 | -3,835 | -5,304 | -1,384 |
| 0,658  | 0,838  | -0,065 | -0,291 | 0,443  | -0,004 | 0,190  | 0,004  | -0,532 | -0,627 | 2,948  |
| -1,600 | -1,225 | -1,363 | -1,777 | -0,189 | 0,939  | 1,498  | 1,511  | 0,189  | 0,568  | 2,862  |
| 1,797  | 2,607  | 2,227  | 4,108  | 2,704  | -3,021 | -2,936 | -3,240 | -2,975 | -4,751 | -0,813 |
| 2,788  | 3,354  | 3,498  | 3,806  | 3,704  | -3,818 | -3,857 | -3,610 | -4,134 | -5,766 | -1,363 |
| 2,170  | 2,636  | 2,377  | 2,993  | 2,543  | -4,011 | -3,100 | -3,828 | -2,725 | -6,077 | -1,555 |
| 1,265  | 1,358  | 1,352  | 1,468  | 1,582  | -3,223 | -3,516 | -3,205 | -3,540 | -4,170 | -1,384 |
| 2,964  | 1,850  | 3,756  | 2,859  | 3,030  | -3,395 | -3,356 | -3,499 | -3,169 | -6,528 | -0,354 |
| 1,368  | 2,952  | 3,696  | 3,065  | 2,322  | -1,864 | -2,484 | -1,755 | -3,627 | -6,802 | -0,409 |
| 2,798  | 3,538  | 1,875  | 1,733  | 1,722  | -2,743 | -2,752 | -1,712 | -1,916 | -1,820 | 1,490  |
| 0,324  | 1,525  | 0,710  | 0,448  | -0,119 | -0,325 | -0,599 | -0,242 | -0,567 | -1,145 | 1,574  |

|        |        |        |        |        |        |        |        |        |        |        |
|--------|--------|--------|--------|--------|--------|--------|--------|--------|--------|--------|
| 0,087  | 0,240  | -0,656 | -0,940 | -0,086 | 0,086  | 0,334  | 0,293  | -0,270 | -0,519 | 3,099  |
| 1,334  | 2,147  | 1,849  | 2,850  | 2,379  | -3,082 | -2,762 | -2,882 | -3,547 | -4,026 | -1,017 |
| 0,910  | 1,734  | 1,151  | 1,331  | 1,502  | -2,884 | -3,705 | -2,388 | -3,347 | -2,964 | -0,520 |
| 1,399  | 2,349  | 1,811  | 3,500  | 2,239  | -2,825 | -3,393 | -4,869 | -2,737 | -6,485 | -1,543 |
| 2,382  | 2,903  | 2,803  | 3,416  | 3,604  | -3,185 | -3,584 | -3,159 | -3,930 | -3,513 | -1,664 |
| 2,582  | 2,986  | 3,304  | 3,903  | 3,253  | -3,112 | -3,819 | -3,368 | -5,135 | -4,127 | -2,044 |
| 2,012  | 3,292  | 3,435  | 3,968  | 3,350  | -2,939 | -3,497 | -3,325 | -4,284 | -5,994 | -1,237 |
| 0,156  | -0,032 | -0,259 | 0,032  | 0,794  | 0,614  | -0,224 | -0,157 | -0,620 | 0,808  | 2,596  |
| 0,011  | 0,674  | 0,297  | 0,509  | 1,431  | -0,883 | -1,777 | -1,334 | -2,100 | -0,380 | 0,495  |
| 1,451  | 2,226  | 2,075  | 2,753  | 2,417  | -3,014 | -3,093 | -3,035 | -3,555 | -4,316 | -1,093 |
| 2,738  | 2,715  | 2,669  | 3,174  | 3,426  | -3,571 | -3,654 | -3,211 | -4,011 | -4,838 | -1,538 |
| -0,418 | -0,215 | -0,292 | 0,026  | 0,647  | 0,479  | -0,026 | 0,409  | -0,201 | 0,325  | 2,882  |
| 1,795  | 2,218  | 2,734  | 2,893  | 2,125  | -3,197 | -3,532 | -3,154 | -3,739 | -5,315 | -1,721 |
| 1,519  | 3,461  | 2,429  | 3,336  | 2,804  | -3,245 | -3,202 | -2,755 | -4,546 | -6,493 | -1,435 |
| 2,814  | 1,748  | 2,586  | 2,000  | 2,621  | -2,920 | -2,461 | -2,885 | -2,900 | -2,911 | -1,091 |
| -0,368 | -0,053 | 0,366  | -0,237 | 0,241  | -0,060 | 0,391  | 0,053  | 0,566  | -0,889 | 2,971  |
| 1,842  | 2,157  | 2,347  | 2,706  | 2,821  | -3,823 | -3,960 | -3,585 | -4,023 | -4,522 | -1,946 |
| -0,054 | 0,419  | 0,936  | 1,403  | 2,066  | -2,838 | -3,532 | -3,473 | -3,775 | -2,661 | -0,681 |
| -5,101 | -3,176 | -3,264 | -2,940 | -3,379 | 3,009  | 2,937  | 2,706  | 2,602  | 3,326  | 4,926  |
| 2,752  | 2,946  | 2,712  | 3,384  | 3,853  | -3,543 | -3,424 | -3,112 | -3,730 | -4,439 | -1,595 |
| 1,984  | 2,242  | 3,071  | 3,061  | 2,746  | -3,183 | -3,508 | -2,913 | -3,661 | -5,462 | -1,755 |
| 2,146  | 2,058  | 2,402  | 3,033  | 3,053  | -3,520 | -3,697 | -2,982 | -3,878 | -4,456 | -1,167 |
| 1,793  | 2,904  | 2,666  | 2,911  | 2,943  | -3,565 | -3,379 | -2,999 | -3,900 | -5,738 | -1,824 |
| 1,284  | 1,406  | 1,616  | 2,479  | 2,025  | -3,044 | -3,730 | -3,229 | -3,668 | -3,765 | -1,056 |
| -1,714 | -1,818 | -1,903 | -3,626 | -1,787 | 2,600  | 2,187  | 2,761  | 1,714  | 2,207  | 4,932  |
| 0,433  | 0,683  | 0,871  | 1,431  | 2,292  | -2,466 | -3,543 | -3,194 | -3,156 | -2,137 | -0,152 |
| -0,106 | 0,211  | -0,465 | -0,750 | 0,087  | -0,007 | 0,091  | 0,007  | -0,159 | 0,149  | 2,060  |
| 2,994  | 1,731  | 3,814  | 2,975  | 3,269  | -3,006 | -3,154 | -3,070 | -3,158 | -6,984 | -0,522 |
| -0,282 | -0,262 | 0,383  | -0,101 | -0,203 | 1,380  | 1,549  | 0,946  | 0,047  | -0,047 | 3,530  |
| 0,600  | 1,864  | 0,285  | 0,709  | 0,702  | -0,915 | -1,744 | -1,009 | -1,687 | -0,743 | 1,354  |
| 5,421  | 1,686  | 3,882  | 3,811  | 4,758  | -1,608 | -2,355 | -1,137 | -1,565 | -1,901 | 1,034  |
| -1,124 | -0,457 | -0,562 | -0,633 | 0,631  | 0,897  | 0,393  | 0,736  | -0,393 | 0,583  | 2,475  |
| 2,619  | 3,058  | 3,345  | 3,777  | 3,843  | -3,923 | -3,943 | -3,733 | -4,048 | -5,808 | -1,198 |
| 1,142  | 2,889  | 0,494  | 0,997  | 0,572  | -1,077 | -1,953 | -1,375 | -1,693 | -1,804 | 0,713  |
| 3,156  | 2,749  | 2,602  | 3,741  | 2,998  | -3,758 | -3,443 | -2,958 | -4,066 | -6,615 | -1,384 |
| 1,173  | 1,336  | 1,472  | 2,239  | 1,913  | -3,032 | -3,662 | -3,199 | -3,785 | -3,715 | -1,035 |
| 1,272  | 2,112  | 1,741  | 2,846  | 2,446  | -2,841 | -2,483 | -2,775 | -3,436 | -4,019 | -0,973 |
| 0,983  | 1,250  | 1,087  | 0,993  | 1,476  | -1,452 | -1,707 | -1,407 | -2,022 | -1,495 | 0,146  |
| -0,822 | -0,219 | -0,725 | -0,784 | -0,357 | 0,937  | 0,535  | 0,623  | 0,219  | 0,898  | 2,346  |
| -1,576 | -1,528 | -1,832 | -1,226 | -0,772 | 1,403  | 0,878  | 1,105  | 0,772  | 1,627  | 3,076  |
| -5,025 | -3,773 | -5,787 | -4,588 | -1,903 | 2,021  | 2,121  | 2,224  | 1,903  | 2,107  | 6,071  |
| 0,908  | 1,908  | -0,218 | -0,776 | 0,001  | -0,063 | -0,001 | -0,373 | 0,092  | -0,141 | 5,190  |
| 0,919  | 1,597  | 1,683  | 1,737  | 1,385  | -2,634 | -3,161 | -2,499 | -3,359 | -3,059 | -0,919 |
| -0,117 | 0,731  | 0,310  | 0,074  | 0,401  | -1,215 | -1,147 | -0,710 | -1,085 | 0,106  | 0,715  |
| 1,219  | 1,769  | 1,628  | 1,885  | 1,459  | -1,621 | -2,355 | -1,951 | -2,350 | -3,013 | -0,544 |
| 0,889  | 1,397  | 1,572  | 2,096  | 1,779  | -3,130 | -3,664 | -3,646 | -3,571 | -3,656 | -1,040 |
| 2,605  | 2,584  | 2,759  | 3,422  | 2,923  | -4,075 | -3,135 | -3,353 | -3,420 | -5,724 | -1,372 |
| -0,400 | -0,044 | -0,710 | -1,055 | 0,099  | 0,169  | 0,331  | 0,044  | -0,480 | 0,311  | 1,916  |
| 0,988  | 1,376  | 1,353  | 0,977  | 1,047  | -2,828 | -1,185 | -2,867 | -2,050 | -0,316 | -0,279 |
| -0,179 | -0,303 | -0,003 | 0,209  | -0,246 | 0,030  | 0,338  | -0,120 | -0,225 | -0,133 | 3,864  |
| 1,468  | 1,854  | 1,955  | 2,974  | 1,820  | -3,023 | -2,900 | -2,972 | -3,311 | -4,388 | -1,565 |
| 0,527  | 2,196  | -0,018 | 0,484  | 0,429  | -1,040 | -2,291 | -0,864 | -2,182 | -0,623 | 1,584  |
| -0,585 | -1,081 | -1,872 | -2,409 | -2,482 | 0,922  | 1,024  | 0,819  | 0,585  | 0,623  | 3,190  |
| 2,383  | 2,113  | 1,798  | 1,949  | 1,845  | -4,238 | -4,214 | -4,485 | -4,789 | -4,373 | -1,108 |
| 0,547  | 1,034  | 0,769  | 1,023  | 1,412  | -1,066 | -1,526 | -1,379 | -1,869 | -0,818 | 0,446  |
| 0,453  | 1,150  | 0,439  | 0,692  | 1,012  | -1,399 | -1,425 | -1,133 | -1,563 | -0,964 | 0,038  |

|        |        |        |        |        |        |        |        |        |        |        |
|--------|--------|--------|--------|--------|--------|--------|--------|--------|--------|--------|
| 2,919  | 1,778  | 1,936  | 2,082  | 5,102  | -4,426 | -4,426 | -4,350 | -4,017 | -7,254 | -1,864 |
| 1,855  | 2,573  | 3,293  | 3,233  | 1,943  | -4,708 | -2,987 | -3,381 | -2,015 | -2,439 | -0,779 |
| 0,058  | 0,436  | 0,239  | 0,173  | 0,522  | -0,514 | -0,766 | -0,546 | -1,122 | -1,033 | 1,073  |
| 1,171  | 1,372  | 0,541  | 0,764  | 0,587  | -1,428 | -1,395 | -1,102 | -3,287 | -1,609 | 1,760  |
| -1,580 | -2,478 | -0,967 | -1,549 | -1,863 | 1,673  | 1,867  | 1,953  | 0,967  | 1,360  | 4,190  |
| 0,953  | 1,457  | 0,661  | 1,053  | 0,497  | -1,364 | -1,551 | -1,287 | -2,031 | -1,716 | 1,281  |
| -1,329 | -0,579 | -1,202 | -0,805 | -0,348 | 0,797  | 0,768  | 0,452  | 0,348  | 0,424  | 2,076  |
| 2,294  | 2,094  | 3,703  | 5,503  | 4,133  | -2,424 | -5,374 | -2,744 | -2,779 | -5,659 | -1,806 |
| 1,265  | 2,101  | 0,944  | 1,232  | 1,277  | -0,814 | -1,189 | -0,919 | -1,318 | -0,849 | 1,613  |
| 1,313  | 2,272  | 1,353  | 2,113  | 2,417  | -3,710 | -2,944 | -3,182 | -2,435 | -6,155 | -0,967 |
| 0,157  | 0,636  | 0,450  | 0,721  | 0,496  | -0,350 | -0,859 | -0,694 | -1,491 | -0,653 | 1,177  |
| 0,463  | 1,049  | 1,244  | 1,339  | 1,953  | -2,589 | -2,024 | -1,576 | -1,998 | -1,373 | -0,543 |
| -0,243 | 0,085  | -0,069 | 0,018  | -0,315 | -0,106 | -0,431 | -1,017 | -0,927 | -1,734 | 0,976  |
| 0,158  | 0,741  | -0,015 | 0,015  | 0,260  | -0,530 | -0,650 | -0,521 | -0,707 | -1,064 | 0,746  |
| 0,486  | 1,056  | 0,848  | 0,766  | 0,433  | -2,339 | -2,176 | -2,061 | -2,368 | -2,443 | -0,336 |
| 0,772  | 1,413  | 0,991  | 1,248  | 1,659  | -2,157 | -2,497 | -2,310 | -2,832 | -1,416 | -0,745 |
| 0,754  | 2,091  | 0,450  | 0,796  | 0,833  | -0,845 | -1,000 | -0,723 | -1,334 | -0,839 | 0,912  |
| 1,680  | 1,754  | 1,659  | 1,723  | 1,501  | -3,171 | -3,541 | -2,956 | -2,317 | -5,049 | -1,953 |
| 0,569  | 0,875  | 0,318  | 0,486  | 0,813  | -2,005 | -1,242 | -0,137 | -1,332 | -0,550 | 0,552  |
| -0,001 | 0,575  | 0,349  | 1,070  | 0,389  | -1,241 | -0,681 | -1,107 | -1,281 | -3,401 | 0,639  |
| 0,014  | 0,821  | 0,287  | 0,351  | 1,446  | -0,604 | -1,136 | -0,922 | -1,764 | 0,034  | 0,274  |
| 0,342  | 0,720  | 0,644  | 0,918  | 1,444  | -0,896 | -1,464 | -1,158 | -1,253 | -0,224 | -0,062 |
| -0,847 | -0,197 | -0,669 | -0,655 | -0,346 | 0,201  | 0,189  | 0,026  | 0,067  | 0,388  | 1,636  |
| 0,873  | 1,132  | 0,644  | 0,563  | 0,264  | -0,370 | -0,481 | -0,264 | -0,556 | -1,746 | 1,275  |
| 0,588  | 0,988  | 0,539  | 0,545  | 0,021  | -1,654 | -2,069 | -1,551 | -1,969 | -2,005 | -0,804 |
| 0,572  | 1,124  | 1,196  | 1,494  | 1,953  | -2,315 | -3,083 | -2,604 | -3,093 | -1,984 | -1,010 |
| 0,390  | 0,750  | 1,236  | 0,801  | 1,084  | -1,239 | -1,896 | -0,872 | -1,256 | -0,619 | -0,084 |
| -0,551 | -1,846 | -2,218 | -2,538 | -0,757 | 0,587  | 0,825  | 0,543  | 0,199  | 0,230  | 2,760  |
| 0,789  | 2,035  | 1,085  | 0,883  | 0,594  | -1,815 | -1,609 | -1,702 | -1,684 | -1,973 | -0,146 |
| -0,272 | 0,517  | -0,074 | 0,587  | 1,206  | -0,629 | -1,525 | -0,496 | -1,587 | 0,363  | 0,723  |
| -0,679 | 0,193  | 0,327  | 0,652  | 0,367  | -0,861 | -1,095 | -1,200 | -0,594 | -1,004 | 0,943  |
| 1,712  | 1,974  | 1,724  | 1,854  | 1,656  | -2,807 | -3,330 | -2,815 | -1,997 | -4,469 | -1,710 |
| 1,272  | 0,939  | 0,589  | 0,522  | 0,144  | -1,954 | -2,057 | -1,679 | -2,467 | -2,727 | -0,074 |
| -1,956 | -2,031 | -2,193 | -2,511 | -2,101 | 1,804  | 2,023  | 1,691  | 1,978  | 1,691  | 4,390  |
| 0,068  | -0,999 | -1,430 | -0,178 | -1,015 | 0,178  | 0,793  | 1,079  | -0,068 | 0,129  | 2,009  |
| 1,521  | 1,683  | 1,239  | 0,980  | 1,115  | -2,230 | -2,714 | -1,703 | -3,261 | -2,442 | -1,111 |
| 1,598  | 2,169  | 1,495  | 1,876  | 2,413  | -2,151 | -2,648 | -2,519 | -3,026 | -1,660 | -1,197 |
| 0,378  | 0,896  | 0,711  | 0,685  | 0,908  | -0,748 | -0,633 | -0,646 | -0,718 | -0,774 | 0,806  |
| 0,911  | 0,304  | -0,020 | 0,024  | 0,705  | -0,559 | -0,429 | -0,381 | -1,053 | -0,616 | 0,994  |
| -2,637 | -1,553 | -1,387 | -1,245 | -1,697 | 1,363  | 1,199  | 1,297  | 1,032  | 1,061  | 2,211  |



| CD4creGARPII-fl_stim_25 | CD4creGARPII-fl_stim_18 | CD4creGARPII-fl_stim_19 | CD4creGARPII-fl_stim_20 | Refseq       | GeneID |
|-------------------------|-------------------------|-------------------------|-------------------------|--------------|--------|
| 3,748                   | 0,298                   | -1,385                  | 0,988                   | NM_009139    | 20305  |
| 4,380                   | 4,737                   | 3,797                   | 5,578                   | NM_008198    | 14962  |
| -1,914                  | -1,612                  | -2,845                  | -2,432                  | XM_003085465 |        |
| -1,980                  | -1,617                  | -2,899                  | -2,458                  | XM_001472091 |        |
| -1,831                  | -2,058                  | -2,949                  | -2,655                  |              | 16061  |
| -1,253                  | -3,103                  | -0,890                  | -0,955                  |              |        |
| -0,259                  | -0,158                  | -1,074                  | 0,687                   |              |        |
| 2,955                   | -0,067                  | 0,067                   | 1,134                   | NM_010370    | 14938  |
| 1,592                   | 1,441                   | -0,133                  | 0,133                   | NM_024470    | 79410  |
| 0,281                   | -1,217                  | 0,503                   | 0,083                   | NM_001109657 | 14457  |
| -0,255                  | -3,085                  | -1,672                  | -1,122                  |              |        |
| -1,423                  | -4,072                  | -4,203                  | -3,066                  | NM_001159904 | 17059  |
| -2,208                  | -0,565                  | -0,188                  | -1,644                  |              |        |
| -1,710                  | -2,761                  | -2,350                  | -1,259                  |              |        |
| -1,889                  | -2,309                  | -1,432                  | -1,618                  |              |        |
| 1,358                   | 0,196                   | 0,769                   | 0,681                   | NM_007640    | 12480  |
| 3,172                   | 0,291                   | -0,575                  | 1,965                   | NM_019948    | 56619  |
| -1,215                  | -2,801                  | -0,808                  | -1,024                  | XM_904758    |        |
| -0,048                  | -1,985                  | -1,086                  | -0,612                  | NM_153590    | 243655 |
| -0,413                  | -1,959                  | -0,948                  | -0,646                  | NM_033078    | 27007  |
| 0,765                   | 0,248                   | 0,457                   | 0,903                   | NM_008463    | 16636  |
| -1,809                  | -2,652                  | -1,242                  | -0,645                  |              |        |
| 1,840                   | -0,204                  | 0,778                   | 1,246                   | NM_024470    | 79410  |
| -3,020                  | -3,840                  | -3,413                  | 0,400                   |              |        |
| -1,370                  | -1,600                  | -1,751                  | -0,898                  |              |        |
| 2,114                   | 0,365                   | 0,047                   | 1,569                   | NM_008361    | 16176  |
| 0,279                   | -0,636                  | -0,466                  | 1,180                   | NM_001077189 | 14130  |
| -1,288                  | -2,150                  | -0,505                  | -0,221                  |              |        |
| 0,949                   | -0,817                  | -0,118                  | 0,631                   | NM_011094    | 18730  |
| -1,994                  | -2,609                  | -1,827                  | -1,163                  |              |        |
| 0,021                   | 1,107                   | -2,757                  | 0,086                   | NM_009369    | 21810  |
| 3,818                   | 2,893                   | 2,957                   | 3,309                   | NM_010558    | 16191  |
| 1,625                   | -0,926                  | -0,316                  | 0,353                   | NM_010649    | 16635  |
| 1,259                   | 0,101                   | 0,379                   | 1,048                   | NM_010371    | 14940  |
| -1,228                  | -2,146                  | -1,059                  | -0,541                  |              |        |
| -1,688                  | -2,233                  | -1,365                  | -0,864                  |              |        |
| 2,970                   | 2,395                   | 1,795                   | 3,209                   | NM_008392    | 16365  |
| 0,710                   | -0,452                  | -0,511                  | 0,481                   | NM_021334    | 16411  |
| 0,655                   | 2,021                   | 0,151                   | 1,980                   | NM_011888    | 24047  |
| -1,927                  | -1,862                  | -2,527                  | -0,959                  |              |        |
| -1,949                  | -1,795                  | -2,452                  | 1,336                   |              |        |
| 4,008                   | 3,490                   | 4,213                   | 4,551                   | NM_008373    | 16198  |
| 1,684                   | 1,404                   | 1,174                   | 0,857                   | NM_008179    | 14853  |
| -1,874                  | -2,323                  | -1,109                  | -0,707                  |              |        |
| 0,838                   | -0,068                  | 0,068                   | 0,592                   | NM_146191    | 233328 |
| -2,171                  | -2,934                  | -0,889                  | -0,789                  |              |        |

|        |        |        |        |              |           |
|--------|--------|--------|--------|--------------|-----------|
| -1,796 | -2,300 | -1,332 | -0,846 |              |           |
| 0,899  | 1,185  | 1,145  | 1,762  | NM_023143    | 50909     |
| 0,476  | 0,695  | 0,663  | 1,065  | NM_010736    | 17000     |
| -1,666 | -0,077 | -0,743 | -1,159 |              |           |
| -1,913 | -2,615 | -1,480 | -0,851 |              |           |
| -1,943 | -1,712 | -1,312 | -1,210 |              |           |
| 2,028  | 0,256  | 1,410  | 1,967  | NM_007670    | 12579     |
| -2,292 | -3,119 | -1,919 | -1,946 | XM_003086781 | 100505009 |
| -2,178 | -2,384 | -1,378 | -1,030 |              |           |
| -1,342 | -2,157 | -1,308 | -0,526 |              |           |
| -0,835 | -2,066 | -0,960 | 0,147  | NM_145141    | 98752     |
| -2,356 | -2,439 | -1,499 | -1,475 |              |           |
| -1,579 | -3,654 | -1,128 | -1,533 |              |           |
| 0,350  | 0,587  | -0,353 | 0,624  | NM_021297    | 21898     |
| 0,756  | 0,096  | -0,033 | 1,007  | NM_011095    | 18733     |
| -2,368 | -2,368 | -1,820 | -1,241 |              |           |
| -0,859 | -2,725 | -3,342 | -2,080 | NM_010737    | 17057     |
| -2,121 | -2,865 | -1,665 | -1,516 |              |           |
| 0,210  | -1,532 | -0,575 | -0,017 | NM_007549    | 12143     |
| 0,436  | -1,102 | -1,201 | -0,271 | NM_177155    | 320407    |
| -2,699 | -2,674 | -1,674 | -1,346 |              |           |
| 3,007  | 2,053  | 2,592  | -0,009 | NR_045120    | 100417675 |
| -2,513 | -1,834 | -2,529 | 0,481  |              |           |
| 0,634  | 0,125  | 0,491  | 1,314  |              | 15951     |
| -2,540 | -4,087 | -2,150 | -2,227 |              |           |
| 0,156  | -1,054 | -0,625 | 0,533  | NM_010188    | 14131     |
| 5,624  | 5,197  | 4,926  | 5,605  | NM_019577    | 56221     |
| 0,638  | 0,644  | 0,198  | 0,622  | NM_007643    | 12491     |
| -2,330 | -2,549 | -1,987 | -1,148 |              |           |
| -1,821 | -2,232 | -1,332 | -0,921 |              |           |
| -1,139 | -2,138 | -0,983 | -0,638 |              |           |
| 0,927  | 0,975  | 0,905  | 0,896  | NM_001025602 | 17082     |
| 1,217  | -0,728 | -0,392 | 0,359  | NM_010650    | 16639     |
| -0,622 | -2,968 | -1,271 | -0,594 |              |           |
| -2,480 | -2,477 | -1,832 | -1,362 |              |           |
| -1,454 | -1,938 | -0,644 | -1,087 |              |           |
| -0,792 | -1,136 | -1,938 | -1,246 | NM_009915    | 12772     |
| 5,060  | 1,762  | 1,731  | 2,447  | NM_031168    | 16193     |
| -1,621 | -2,185 | -1,167 | -1,456 |              |           |
| 1,778  | 1,380  | 0,863  | 1,745  | NM_026100    | 67344     |
| -1,619 | -2,389 | -1,547 | -1,262 |              |           |
| -2,468 | -2,455 | -1,891 | -1,315 |              |           |
| -1,994 | -2,454 | -1,243 | -0,986 |              |           |
| -2,296 | -3,040 | -1,944 | -1,653 |              |           |
| -1,277 | -2,753 | -2,004 | -1,512 |              |           |
| -2,142 | -2,727 | -1,835 | -1,588 | XM_918237    | 640979    |
| 2,091  | 1,160  | 1,167  | 1,918  | NM_013532    | 14728     |
| 2,532  | 1,915  | 2,856  | 2,888  | NM_001039701 | 16181     |
| -1,298 | -1,650 | -1,056 | -1,104 |              |           |
| -2,326 | -3,072 | -1,949 | -1,596 |              |           |
| -1,565 | -2,544 | -1,921 | -1,921 |              |           |
| -2,086 | -2,246 | -1,627 | -0,700 |              |           |
| -2,295 | -2,828 | -1,515 | -1,254 |              |           |
| -1,649 | -0,130 | -0,609 | -1,031 |              |           |
| 0,830  | -2,074 | -0,048 | -0,150 | NM_010746    | 17086     |
| 1,876  | 1,046  | 1,017  | 1,302  | NM_144548    | 209590    |

|        |        |        |        |              |        |
|--------|--------|--------|--------|--------------|--------|
| 2,177  | 0,986  | 1,404  | 1,954  | NM_013532    | 14728  |
| -1,751 | -2,307 | -1,228 | -0,949 |              |        |
| -1,112 | -1,364 | -1,644 | -0,263 | NM_028728    | 74039  |
| -3,331 | -2,902 | -1,544 | -0,742 |              |        |
| -2,216 | -2,311 | -1,527 | -1,326 |              |        |
| -1,977 | -3,782 | -0,951 | -1,221 |              |        |
| -2,117 | -3,417 | -1,662 | -1,510 |              | 16061  |
| 1,582  | 1,488  | 1,675  | 2,401  | NM_009877    | 12578  |
| 0,165  | -0,011 | 0,613  | 1,809  | NM_009844    | 12478  |
| -1,544 | -2,382 | -1,265 | -0,911 |              |        |
| -2,311 | -2,563 | -1,834 | -1,363 |              |        |
| 2,139  | 0,930  | 1,384  | 2,179  | NM_007670    | 12579  |
| -2,309 | -2,296 | -1,474 | -1,009 |              |        |
| -1,987 | -3,384 | -1,286 | -0,645 |              |        |
| -2,080 | -1,626 | -0,536 | -0,344 |              |        |
| 2,620  | 1,858  | 1,556  | 1,823  | NM_016971    | 50929  |
| -2,497 | -2,339 | -2,164 | -1,156 | NM_152839    | 16069  |
| -2,323 | -2,012 | -1,682 | 0,245  |              |        |
| 4,728  | 4,000  | 4,589  | 4,713  | NM_008355    | 16163  |
| -2,590 | -2,250 | -1,786 | -1,427 |              |        |
| -2,206 | -2,363 | -1,346 | -0,830 |              |        |
| -2,488 | -2,553 | -1,946 | -0,966 |              |        |
| -2,431 | -2,500 | -1,650 | -1,024 |              |        |
| -2,512 | -2,331 | -1,935 | -0,814 |              |        |
| 3,768  | 3,935  | 3,683  | 4,673  | NM_008599    | 17329  |
| -1,671 | -1,590 | -1,451 | 0,589  |              |        |
| 1,762  | 1,014  | 1,231  | 1,710  | NM_011617    | 21948  |
| -2,431 | -2,571 | -1,457 | -1,312 |              |        |
| 2,643  | 2,925  | 2,289  | 2,202  | NM_203320    | 330122 |
| 1,225  | -0,753 | 0,361  | 0,681  | NM_001110323 | 16638  |
| 0,079  | -0,252 | -0,931 | 0,570  | NM_009396    | 21928  |
| 2,264  | 1,893  | 1,980  | 2,690  | NM_011611    | 21939  |
| -2,637 | -3,200 | -2,271 | -1,435 |              |        |
| 1,093  | -0,691 | -0,280 | -0,029 | NM_010650    | 16639  |
| -2,584 | -3,366 | -2,101 | -1,854 |              |        |
| -2,390 | -2,293 | -2,008 | -0,785 |              |        |
| -1,714 | -2,491 | -1,198 | -0,976 |              |        |
| 0,129  | -0,614 | -0,367 | 0,152  | NM_022021    | 63955  |
| 2,371  | 1,655  | 1,691  | 2,242  | NM_010215    | 14204  |
| 3,069  | 2,552  | 2,639  | 2,721  | NM_011332    | 20295  |
| 4,489  | 3,224  | 3,205  | 3,724  | NM_010556    | 16187  |
| 2,667  | 0,804  | 1,535  | 1,464  | NM_011338    | 20308  |
| -1,375 | -1,607 | -1,976 | -1,475 | NM_015790    | 50723  |
| 0,492  | 0,323  | -0,074 | 0,760  | NM_020044    | 56743  |
| -0,522 | -1,530 | -0,781 | -1,222 | NM_007640    | 12480  |
| -2,496 | -2,683 | -2,105 | -0,467 |              |        |
| -2,095 | -3,140 | -1,894 | -1,869 |              |        |
| 1,673  | 1,275  | 1,196  | 1,951  | NM_010555    | 16178  |
| -0,845 | -0,566 | -0,558 | -0,866 | NM_001134458 | 16199  |
| 1,489  | 0,982  | 1,268  | 1,344  | NM_008337    | 15978  |
| -2,254 | -1,933 | -1,256 | -0,716 |              |        |
| 1,468  | -0,340 | 0,251  | 0,414  | NM_014194    | 16638  |
| 2,912  | 1,611  | 1,954  | 2,270  | NM_013542    | 14939  |
| -2,813 | -3,366 | -3,284 | -2,926 | NM_013653    | 20304  |
| 0,064  | -0,149 | -0,064 | 1,060  | NM_001042605 | 16149  |
| 0,293  | -0,230 | -0,489 | 0,056  | NM_010580    | 16419  |

|        |        |        |        |              |           |
|--------|--------|--------|--------|--------------|-----------|
| -3,210 | -3,753 | -3,006 | 0,243  | XM_001476673 | 100046710 |
| -2,078 | -2,746 | -1,239 | -1,612 |              |           |
| 0,610  | 0,330  | 0,550  | 1,265  | NM_021274    | 15945     |
| 1,108  | -0,677 | -0,357 | -0,059 | NM_030599    | 80782     |
| 3,038  | 2,863  | 3,007  | 3,804  | NM_008599    | 17329     |
| 0,583  | -0,638 | -0,513 | -0,217 | NM_030599    | 80782     |
| 1,845  | 1,409  | 1,633  | 1,784  | NM_009401    | 21941     |
| -1,452 | -2,407 | -1,035 | -0,882 |              |           |
| 1,193  | -0,143 | -0,081 | 0,394  | NM_010185    | 14127     |
| -2,021 | -3,161 | -1,875 | -1,018 |              |           |
| 0,601  | -0,039 | 0,412  | 0,797  | NM_009142    | 20312     |
| -1,121 | -0,725 | -0,885 | 0,325  | NM_007655    | 12518     |
| 0,534  | 0,081  | 0,337  | 0,010  | NM_023158    | 66102     |
| 0,604  | -0,044 | 0,238  | 0,632  | NM_012057    | 27056     |
| -0,772 | -1,497 | -1,564 | -1,093 | NM_008329    | 15951     |
| -1,089 | -1,162 | -1,103 | -0,064 | NM_008339    | 15985     |
| 1,104  | -0,291 | -0,005 | 0,374  | NM_010651    | 16640     |
| -2,214 | -1,574 | -2,207 | -1,038 |              |           |
| -0,024 | -0,034 | -1,143 | 0,677  | NM_008795    | 18557     |
| -0,001 | -0,519 | -0,029 | -0,099 | NM_010652    | 16641     |
| -0,088 | -0,014 | 0,585  | 1,772  | NM_001169153 | 246746    |
| -0,282 | 0,030  | 0,111  | 1,188  | NM_028075    | 72049     |
| 1,766  | 1,100  | 1,063  | 1,370  | NM_019465    | 54698     |
| 1,776  | 0,575  | 0,701  | 0,692  | NM_008362    | 16177     |
| -0,936 | -1,270 | -0,755 | -0,021 | NM_133211    | 170743    |
| -1,520 | -1,550 | -1,440 | -0,047 |              | 12518     |
| 0,084  | -0,348 | -0,321 | 0,329  | NM_024124    | 79221     |
| 1,785  | 1,564  | 1,697  | 1,488  | NM_021782    | 60505     |
| 0,141  | -0,567 | -0,823 | -0,758 | NM_001034031 | 57890     |
| 0,361  | -0,020 | 0,492  | 1,849  | NM_008370    | 16192     |
| 0,259  | -0,503 | 0,110  | 0,070  | NM_008510    | 16963     |
| -2,042 | -1,529 | -1,964 | -1,049 |              |           |
| -0,865 | -1,970 | -1,408 | -0,964 | NM_010553    | 16174     |
| 3,225  | 2,416  | 2,888  | 2,717  |              | 20290     |
| 2,003  | 0,598  | 1,013  | 1,228  | NM_001079876 | 237436    |
| -1,395 | -1,424 | -1,702 | -0,429 | NM_010871    | 17952     |
| -1,479 | -1,873 | -1,803 | -0,486 | NM_026976    | 69169     |
| 0,312  | 0,123  | 0,168  | 0,635  | NM_007609    | 12363     |
| 0,865  | 0,020  | 0,130  | 0,455  | NM_001025602 | 17082     |
| 2,341  | 1,843  | 2,286  | 2,210  | NM_021283    | 16189     |
